# Supplementary material for: Sequence and Ionomic Analysis of Divergent Strains of Maize Inbred Line B73 with an Altered Growth Phenotype
Source: PLoS One. 2014 May 7;9(5):e96782. doi: 10.1371/journal.pone.0096782 (PMC4013074; doi:10.1371/journal.pone.0096782)
Supplement: Dataset S1 — Filtered SNPs in the WGS data. (TSV) [file pone.0096782.s007.tsv]

chr	pos	ref	alt	qual	setA	setB
UNKNOWN	1079664	A	G	187	0	2
UNKNOWN	1622514	G	A	46.2	2	0
UNKNOWN	2841223	G	A	214	0	2
1	475082	C	T	51.2	2	0
1	2013787	C	T	208	0	2
1	3216449	G	A	182	0	2
1	3748467	G	A	214	0	2
1	8675876	G	A	214	0	2
1	9994913	C	T	138	2	0
1	10925942	C	T	149	2	0
1	11267309	G	A	214	0	2
1	11523544	G	C	214	0	2
1	11651420	G	A	192	0	2
1	11812676	C	T	999	2	0
1	14849444	G	A	214	0	2
1	15247313	C	G	162	0	2
1	15472685	G	A	214	0	2
1	16796083	G	C	214	0	2
1	17004286	G	A	214	0	2
1	17435491	C	T	214	0	2
1	17823745	G	A	999	2	0
1	23101313	C	T	203	0	2
1	29356103	A	G	214	0	2
1	29982836	G	A	178	0	2
1	31430749	G	A	214	0	2
1	32352256	T	C	116	0	2
1	33448870	A	G	181	0	2
1	34327451	C	T	999	2	0
1	35073965	C	T	214	0	2
1	35679627	C	T	87.3	2	0
1	44956840	G	A	201	0	2
1	46619370	C	T	62.6	0	2
1	47336011	C	T	214	0	2
1	47603003	G	A	999	2	0
1	54243741	T	C	98.2	0	2
1	56979645	C	T	108	0	2
1	59965502	G	A	121	0	2
1	63042791	C	A	214	0	2
1	64506550	T	C	999	2	0
1	66752648	A	T	196	0	2
1	66916573	G	A	192	0	2
1	68303819	T	A	214	0	2
1	73259449	C	T	178	0	2
1	73827604	C	T	214	0	2
1	74613105	C	T	999	2	0
1	77871802	G	A	999	2	0
1	81348875	G	A	142	2	0
1	83844962	G	A	130	0	2
1	84381870	T	C	214	0	2
1	86813749	C	T	156	2	0
1	89688250	A	G	129	0	2
1	90058121	A	G	211	0	2
1	92965957	G	A	999	2	0
1	94595221	G	A	999	2	0
1	97225754	G	A	999	2	0
1	98316212	G	A	214	0	2
1	105013885	G	A	999	2	0
1	107322830	G	A	999	2	0
1	109622161	T	C	214	0	2
1	112818538	G	A	214	0	2
1	114578091	G	A	214	0	2
1	119477913	C	T	87.8	0	2
1	121049394	C	T	186	0	2
1	123462223	C	T	151	0	2
1	124856908	C	T	999	2	0
1	125954254	C	T	206	0	2
1	126398557	G	A	103	0	2
1	131530780	G	A	214	0	2
1	135239864	A	C	214	0	2
1	136362785	C	G	999	2	0
1	136614207	A	C	214	0	2
1	136687323	G	A	205	0	2
1	136777104	G	A	101	0	2
1	139119980	G	A	77.2	0	2
1	139126062	G	A	214	0	2
1	139893462	A	G	214	0	2
1	141769919	A	G	108	0	2
1	142801207	G	A	214	0	2
1	144432556	G	T	999	2	0
1	144921528	C	T	214	0	2
1	145692572	G	T	188	0	2
1	146443286	T	A	214	0	2
1	150733750	A	G	214	0	2
1	151041848	A	G	214	0	2
1	151048694	C	T	202	0	2
1	154042626	C	T	214	0	2
1	154325234	T	C	214	0	2
1	154733234	G	A	999	2	0
1	157038017	G	A	214	0	2
1	162430350	G	A	214	0	2
1	164836562	G	A	214	0	2
1	164944974	T	C	49	2	0
1	169389435	T	A	153	0	2
1	172784594	G	A	214	0	2
1	174307869	G	T	98.3	2	0
1	174307870	A	T	99.3	2	0
1	176352104	C	T	999	2	0
1	178496783	A	G	214	0	2
1	180121145	G	A	214	0	2
1	188446105	A	T	999	2	0
1	199423762	C	T	999	2	0
1	200053338	T	C	214	0	2
1	203344027	C	T	214	0	2
1	203624130	C	T	214	0	2
1	204496905	A	G	214	0	2
1	206161885	G	A	211	0	2
1	207719390	A	G	186	0	2
1	209771782	A	G	214	0	2
1	209776869	G	A	214	0	2
1	209920325	T	C	214	0	2
1	211929839	G	A	999	2	0
1	212172928	G	A	214	0	2
1	213846090	C	T	999	2	0
1	214787947	C	T	196	0	2
1	227677370	G	T	214	0	2
1	231303581	C	A	999	2	0
1	234003909	C	T	214	0	2
1	234594152	T	C	41	0	2
1	234624436	A	T	41.4	0	2
1	240207542	C	T	206	0	2
1	241249139	T	C	214	0	2
1	243819973	C	T	999	2	0
1	244250452	C	G	999	2	0
1	244828011	C	T	214	0	2
1	244978753	C	T	214	0	2
1	246397167	A	G	214	0	2
1	247616402	G	A	214	0	2
1	248711390	G	A	148	0	2
1	248836348	T	C	999	2	0
1	252636577	C	T	999	2	0
1	255352653	G	A	999	2	0
1	256887737	C	T	214	0	2
1	256966027	G	A	999	2	0
1	257435702	C	T	51.2	0	2
1	260200806	C	T	183	0	2
1	260766243	C	T	198	0	2
1	260767483	G	A	214	0	2
1	261757908	C	T	214	0	2
1	262064703	C	A	214	0	2
1	263059156	G	A	127	0	2
1	267944031	C	T	158	0	2
1	273301293	C	T	214	0	2
1	274339009	C	T	191	0	2
1	274634690	C	T	133	0	2
1	276447161	G	A	153	0	2
1	277289805	C	T	214	0	2
1	280670696	G	A	71.2	0	2
1	281161377	G	A	214	0	2
1	286649639	C	T	214	0	2
1	289262787	T	C	156	0	2
1	289931972	G	A	209	0	2
1	290974171	G	A	209	0	2
1	292099518	T	C	214	0	2
1	292100417	C	T	214	0	2
1	292100547	T	C	214	0	2
1	292100804	A	G	214	0	2
1	292101686	T	G	214	0	2
1	292101712	A	G	214	0	2
1	292101719	G	A	214	0	2
1	292101769	T	G	214	0	2
1	292110030	T	C	214	0	2
1	292128785	C	T	214	0	2
1	292132545	G	T	214	0	2
1	292132909	A	G	214	0	2
1	292132983	C	A	169	0	2
1	292137096	A	G	189	0	2
1	292144262	C	T	214	0	2
1	292150382	A	G	174	0	2
1	292156385	A	G	131	0	2
1	292156987	G	A	214	0	2
1	292165070	G	A	184	0	2
1	292165658	T	A	214	0	2
1	292166501	G	A	199	0	2
1	292174387	C	T	214	0	2
1	292180631	C	T	148	0	2
1	292181060	G	A	214	0	2
1	292182398	G	A	202	0	2
1	292188039	C	T	214	0	2
1	292189959	T	A	167	0	2
1	292194646	C	T	214	0	2
1	292194808	A	G	144	0	2
1	292195303	G	A	151	0	2
1	292195664	G	A	214	0	2
1	292210447	T	C	202	0	2
1	292210463	T	A	202	0	2
1	292212301	C	T	53.2	0	2
1	292214278	G	A	146	0	2
1	292214474	G	A	128	0	2
1	292215440	C	T	214	0	2
1	292221248	G	A	130	0	2
1	292221340	T	C	214	0	2
1	292226548	C	T	214	0	2
1	292226550	G	C	214	0	2
1	292226675	T	G	127	0	2
1	292226689	G	A	112	0	2
1	292226937	G	C	196	0	2
1	292226942	A	G	192	0	2
1	292226954	C	G	162	0	2
1	292227078	C	T	214	0	2
1	292227115	C	T	214	0	2
1	292227175	T	C	214	0	2
1	292227475	G	A	214	0	2
1	292227550	A	C	214	0	2
1	292228002	G	A	166	0	2
1	292228010	A	C	176	0	2
1	292228014	T	C	190	0	2
1	292228167	C	G	176	0	2
1	292228203	G	A	162	0	2
1	292228239	T	C	157	0	2
1	292228534	A	G	165	0	2
1	292232690	T	A	174	0	2
1	292232717	C	T	180	0	2
1	292232720	C	T	181	0	2
1	292236620	G	T	214	0	2
1	292236674	T	A	214	0	2
1	292236986	A	T	195	0	2
1	292237026	A	G	202	0	2
1	292238589	C	T	214	0	2
1	292238665	C	T	214	0	2
1	292238839	T	C	214	0	2
1	292238845	T	C	214	0	2
1	292239061	A	C	214	0	2
1	292239076	C	T	214	0	2
1	292239118	G	A	214	0	2
1	292239147	G	T	214	0	2
1	292239158	T	C	214	0	2
1	292239189	C	T	214	0	2
1	292239220	G	C	214	0	2
1	292239251	C	T	185	0	2
1	292239350	T	A	184	0	2
1	292239427	T	A	214	0	2
1	292239475	G	C	214	0	2
1	292239509	C	A	200	0	2
1	292239510	T	A	206	0	2
1	292239515	A	T	202	0	2
1	292239560	T	A	183	0	2
1	292276869	A	G	214	0	2
1	292276871	T	A	214	0	2
1	292276918	A	G	214	0	2
1	292276941	C	T	214	0	2
1	292277018	C	G	214	0	2
1	292277036	T	A	214	0	2
1	292277043	G	C	214	0	2
1	292277055	A	C	214	0	2
1	292277069	A	G	214	0	2
1	292277340	A	G	214	0	2
1	292277353	G	A	214	0	2
1	292277525	T	C	214	0	2
1	292277565	T	C	214	0	2
1	292277724	G	A	214	0	2
1	292278167	G	A	214	0	2
1	292278210	A	G	214	0	2
1	292278216	A	C	214	0	2
1	292278404	C	T	205	0	2
1	292278647	A	C	214	0	2
1	292278876	A	G	214	0	2
1	292279342	T	A	214	0	2
1	292279457	T	C	214	0	2
1	292279857	T	C	214	0	2
1	292280165	G	T	214	0	2
1	292281364	T	G	214	0	2
1	292281373	C	A	204	0	2
1	292281378	T	C	190	0	2
1	292281381	C	T	190	0	2
1	292281390	G	A	214	0	2
1	292281455	G	A	214	0	2
1	292281485	T	G	214	0	2
1	292281515	C	T	206	0	2
1	292282100	A	C	198	0	2
1	292282147	T	C	183	0	2
1	292282152	C	T	192	0	2
1	292282293	T	G	214	0	2
1	292282735	C	T	214	0	2
1	292282741	A	T	214	0	2
1	292282774	C	A	179	0	2
1	292283106	A	G	209	0	2
1	292283132	C	T	211	0	2
1	292283176	C	T	185	0	2
1	292283182	C	G	188	0	2
1	292283203	T	C	157	0	2
1	292298302	A	G	214	0	2
1	292298350	T	C	207	0	2
1	292298358	C	A	214	0	2
1	292298366	C	T	206	0	2
1	292298392	A	T	182	0	2
1	292298987	C	T	155	0	2
1	292299006	A	T	175	0	2
1	292299007	T	A	172	0	2
1	292322766	T	A	214	0	2
1	292322788	C	T	214	0	2
1	292322797	C	T	214	0	2
1	292322857	A	C	196	0	2
1	292325462	C	T	194	0	2
1	292325497	T	G	214	0	2
1	292325600	T	C	201	0	2
1	292325601	T	A	202	0	2
1	292325602	G	C	207	0	2
1	292325638	A	T	214	0	2
1	292338648	C	G	214	0	2
1	292347970	G	A	214	0	2
1	292348541	G	C	214	0	2
1	292348813	T	A	214	0	2
1	292350143	G	A	214	0	2
1	292352570	G	C	214	0	2
1	292352621	G	C	214	0	2
1	292352629	T	A	214	0	2
1	292352740	T	C	214	0	2
1	292352817	C	T	214	0	2
1	292352962	G	A	206	0	2
1	292353074	C	T	211	0	2
1	292357700	A	G	214	0	2
1	292361188	G	A	179	0	2
1	292392543	A	G	46.2	0	2
1	292394125	G	A	166	0	2
1	292397085	G	A	81.4	0	2
1	292414196	C	T	215	0	2
1	292417349	T	C	214	0	2
1	292417376	T	C	214	0	2
1	292417397	C	A	210	0	2
1	292417436	G	A	214	0	2
1	292417477	C	T	148	0	2
1	292417482	C	T	130	0	2
1	292417483	A	G	130	0	2
1	292417529	T	C	150	0	2
1	292417560	T	C	182	0	2
1	292417565	A	G	202	0	2
1	292417566	A	G	205	0	2
1	292417665	A	G	214	0	2
1	292417684	T	A	214	0	2
1	292430294	G	C	214	0	2
1	292430335	C	G	214	0	2
1	292430408	A	G	214	0	2
1	292430472	G	A	214	0	2
1	292430711	A	T	214	0	2
1	292430823	T	A	195	0	2
1	292430824	T	C	203	0	2
1	292431066	G	A	214	0	2
1	292431069	C	G	214	0	2
1	292431098	G	A	214	0	2
1	292431112	A	T	214	0	2
1	292431144	G	A	210	0	2
1	292431274	A	C	214	0	2
1	292431494	C	T	214	0	2
1	292431625	G	A	207	0	2
1	292431688	A	G	214	0	2
1	292431743	C	G	214	0	2
1	292431947	G	T	195	0	2
1	292432019	A	G	195	0	2
1	292432043	A	G	214	0	2
1	292432460	C	T	201	0	2
1	292433014	A	T	214	0	2
1	292433022	A	G	214	0	2
1	292433051	T	C	168	0	2
1	292433052	G	A	171	0	2
1	292433092	G	A	145	0	2
1	292433194	G	A	173	0	2
1	292433202	T	C	158	0	2
1	292433212	G	A	167	0	2
1	292434387	T	A	214	0	2
1	292434448	C	T	214	0	2
1	292435274	G	A	166	0	2
1	292435585	C	A	192	0	2
1	292435632	A	C	214	0	2
1	292435646	G	A	200	0	2
1	292435690	A	C	104	0	2
1	292435695	G	A	121	0	2
1	292435978	A	G	140	0	2
1	292436991	C	T	113	0	2
1	292436995	A	G	109	0	2
1	292437364	A	T	78.6	0	2
1	292437384	G	A	98.8	0	2
1	292466464	G	C	168	0	2
1	292466496	A	G	153	0	2
1	292466620	C	T	109	0	2
1	292466625	A	G	111	0	2
1	292477534	C	A	207	0	2
1	292477537	C	G	207	0	2
1	292477574	A	G	140	0	2
1	292478082	T	C	144	0	2
1	292478197	G	A	214	0	2
1	292478249	C	T	139	0	2
1	292478398	C	A	163	0	2
1	292478412	C	A	176	0	2
1	292478491	T	C	95.2	0	2
1	292478504	A	G	72.3	0	2
1	292478512	T	A	63.6	0	2
1	292478525	G	A	54.6	0	2
1	292478635	G	T	129	0	2
1	292479381	A	G	172	0	2
1	292480243	G	A	214	0	2
1	292480398	T	C	214	0	2
1	292480417	C	T	214	0	2
1	292480909	C	T	214	0	2
1	292480990	T	C	214	0	2
1	292481440	T	C	185	0	2
1	292481445	C	G	183	0	2
1	292481470	G	T	192	0	2
1	292481800	A	G	194	0	2
1	292484020	A	C	214	0	2
1	292504530	A	G	214	0	2
1	292504638	G	A	214	0	2
1	292504667	G	A	214	0	2
1	292504708	T	C	180	0	2
1	292504893	T	A	214	0	2
1	292505007	T	A	214	0	2
1	292505072	G	A	214	0	2
1	292505144	G	C	193	0	2
1	292505276	G	A	214	0	2
1	292505313	G	A	214	0	2
1	292505558	G	A	214	0	2
1	292505654	C	T	178	0	2
1	292506150	G	A	214	0	2
1	292516041	A	G	211	0	2
1	292516369	A	G	214	0	2
1	292517260	G	T	214	0	2
1	292517531	T	C	214	0	2
1	292517595	C	T	214	0	2
1	292517671	C	T	189	0	2
1	292517678	A	C	176	0	2
1	292517791	T	C	214	0	2
1	292517828	T	C	214	0	2
1	292517835	A	C	214	0	2
1	292518422	C	T	214	0	2
1	292519109	G	A	214	0	2
1	292519185	C	A	214	0	2
1	292519485	T	C	214	0	2
1	292519870	T	A	214	0	2
1	292519908	T	C	214	0	2
1	292519916	C	T	212	0	2
1	292521007	C	G	214	0	2
1	292522031	T	C	214	0	2
1	292522140	C	T	214	0	2
1	292522183	A	G	214	0	2
1	292522235	G	A	214	0	2
1	292522289	G	A	214	0	2
1	292524432	G	A	173	0	2
1	292524475	A	G	158	0	2
1	292524550	C	T	169	0	2
1	292524567	C	T	193	0	2
1	292524718	G	A	214	0	2
1	292528919	C	T	162	0	2
1	292529320	T	C	176	0	2
1	292530358	G	A	215	0	2
1	292530492	G	A	214	0	2
1	292531504	T	C	204	0	2
1	292531541	A	G	214	0	2
1	292531542	T	G	214	0	2
1	292531576	C	T	214	0	2
1	292531655	A	G	214	0	2
1	292531736	A	G	214	0	2
1	292531804	C	T	214	0	2
1	292531834	A	C	214	0	2
1	292532544	T	A	214	0	2
1	292532606	G	A	202	0	2
1	292533187	A	G	214	0	2
1	292533773	A	G	214	0	2
1	292534204	G	A	138	0	2
1	292534264	G	C	214	0	2
1	292534271	C	T	214	0	2
1	292534332	G	A	200	0	2
1	292534375	A	G	168	0	2
1	292534376	A	G	167	0	2
1	292534383	T	C	159	0	2
1	292534553	G	A	131	0	2
1	292534617	C	A	157	0	2
1	292534636	G	A	165	0	2
1	292534725	G	T	214	0	2
1	292534787	G	A	214	0	2
1	292534812	A	G	214	0	2
1	292534850	C	T	214	0	2
1	292534986	C	T	214	0	2
1	292534987	A	C	214	0	2
1	292534995	A	C	214	0	2
1	292537094	A	G	182	0	2
1	292537107	T	C	208	0	2
1	292537921	T	C	192	0	2
1	292537986	C	A	214	0	2
1	292538029	A	G	189	0	2
1	292538080	A	G	127	0	2
1	292539503	A	G	214	0	2
1	292539581	G	T	214	0	2
1	292539625	T	G	202	0	2
1	292539644	A	G	191	0	2
1	292540239	C	T	146	0	2
1	292540272	T	C	210	0	2
1	292540283	A	T	214	0	2
1	292540344	C	T	160	0	2
1	292540769	A	G	113	0	2
1	292540939	T	A	205	0	2
1	292540946	T	C	214	0	2
1	292540966	A	G	170	0	2
1	292541238	C	T	214	0	2
1	292541239	C	G	214	0	2
1	292541260	A	C	193	0	2
1	292571680	G	A	214	0	2
1	292571842	G	C	214	0	2
1	292571843	G	C	214	0	2
1	292573287	G	C	214	0	2
1	292573391	T	C	198	0	2
1	292573660	T	C	214	0	2
1	292573963	G	A	214	0	2
1	292573993	G	A	214	0	2
1	292575629	T	C	214	0	2
1	292576125	T	G	214	0	2
1	292576159	A	C	214	0	2
1	292576444	C	A	214	0	2
1	292576462	C	T	214	0	2
1	292576478	T	C	214	0	2
1	292576531	C	T	207	0	2
1	292577078	G	A	214	0	2
1	292577887	G	T	214	0	2
1	292577920	G	C	214	0	2
1	292577982	C	T	207	0	2
1	292578600	G	C	214	0	2
1	292578696	T	C	214	0	2
1	292578701	G	A	214	0	2
1	292579618	G	T	214	0	2
1	292579619	T	C	215	0	2
1	292579677	G	A	214	0	2
1	292580163	G	T	169	0	2
1	292581618	C	T	214	0	2
1	292585474	G	A	199	0	2
1	292585554	A	G	214	0	2
1	292586064	T	C	214	0	2
1	292588567	A	G	160	0	2
1	292588752	T	G	154	0	2
1	292592892	C	T	72.3	0	2
1	292593550	A	G	94.3	0	2
1	292596533	T	C	214	0	2
1	292599249	A	G	207	0	2
1	292601079	C	T	205	0	2
1	292601647	G	T	214	0	2
1	292604197	T	C	214	0	2
1	292605534	G	A	214	0	2
1	292607519	C	A	148	0	2
1	292609358	G	A	214	0	2
1	292614876	G	A	214	0	2
1	292616614	T	C	210	0	2
1	292617010	C	T	214	0	2
1	292617296	C	T	214	0	2
1	292627638	G	A	214	0	2
1	292630031	G	A	99.3	0	2
1	292631176	A	G	214	0	2
1	292635776	A	G	173	0	2
1	292642190	G	T	186	0	2
1	292643476	A	G	214	0	2
1	292646650	A	G	214	0	2
1	292647276	C	T	214	0	2
1	292650144	A	G	214	0	2
1	292651077	C	T	214	0	2
1	292653286	G	A	181	0	2
1	292659009	G	A	214	0	2
1	292659436	A	T	190	0	2
1	292665018	T	C	173	0	2
1	292665268	T	C	180	0	2
1	292665369	T	G	214	0	2
1	292666639	C	T	214	0	2
1	292666784	T	A	214	0	2
1	292673111	C	T	214	0	2
1	292673806	A	C	214	0	2
1	292680498	G	A	195	0	2
1	292681735	C	T	214	0	2
1	292687065	G	A	214	0	2
1	292699171	T	C	214	0	2
1	292708687	T	C	214	0	2
1	292718857	C	T	126	0	2
1	292748400	C	T	74.2	0	2
1	292749797	C	T	206	0	2
1	292750606	C	T	208	0	2
1	292753284	A	C	158	0	2
1	292763208	C	T	186	0	2
1	292763247	C	T	122	0	2
1	292770817	C	T	214	0	2
1	292770832	C	T	214	0	2
1	292782178	G	A	214	0	2
1	292782809	C	T	44	0	2
1	292783820	G	A	172	0	2
1	292785086	A	C	161	0	2
1	292787030	G	A	214	0	2
1	292788223	A	G	207	0	2
1	292788332	C	A	206	0	2
1	292789869	T	C	111	0	2
1	292790833	C	T	214	0	2
1	292793497	A	T	214	0	2
1	292797187	T	C	214	0	2
1	292797482	T	C	214	0	2
1	292797504	C	T	214	0	2
1	292797527	G	C	214	0	2
1	292798219	A	G	211	0	2
1	292798237	C	G	146	0	2
1	292798244	T	C	154	0	2
1	292798312	C	T	200	0	2
1	292801712	A	G	147	0	2
1	292801813	G	T	214	0	2
1	292801965	A	G	214	0	2
1	292802221	A	G	198	0	2
1	292802243	T	C	211	0	2
1	292802571	A	C	214	0	2
1	292802584	G	T	214	0	2
1	292802727	T	C	214	0	2
1	292802839	T	A	127	0	2
1	292812324	C	T	214	0	2
1	292812362	G	T	214	0	2
1	292812537	T	C	201	0	2
1	292813329	C	T	214	0	2
1	292813376	T	A	214	0	2
1	292813433	T	G	214	0	2
1	292813525	T	C	163	0	2
1	292813670	C	G	181	0	2
1	292813674	C	T	199	0	2
1	292814439	T	C	214	0	2
1	292814529	A	G	208	0	2
1	292814530	A	G	205	0	2
1	292814635	G	A	193	0	2
1	292814661	G	C	214	0	2
1	292814805	A	G	183	0	2
1	292814853	G	A	158	0	2
1	292814854	C	T	180	0	2
1	292815766	A	G	159	0	2
1	292815843	C	T	159	0	2
1	292815950	G	A	200	0	2
1	292816012	C	G	214	0	2
1	292816016	T	C	214	0	2
1	292816077	T	C	214	0	2
1	292816163	T	C	136	0	2
1	292816299	T	A	214	0	2
1	292816346	T	C	202	0	2
1	292816412	T	C	166	0	2
1	292816745	G	A	195	0	2
1	292816792	T	C	176	0	2
1	292816798	C	T	162	0	2
1	292816812	G	A	149	0	2
1	292816852	T	C	164	0	2
1	292816894	C	T	144	0	2
1	292818317	G	A	171	0	2
1	292818358	C	T	214	0	2
1	292818373	C	T	214	0	2
1	292818390	G	A	214	0	2
1	292818813	C	T	54.7	0	2
1	292818992	G	A	214	0	2
1	292818998	C	A	214	0	2
1	292819055	T	C	135	0	2
1	292819179	A	G	190	0	2
1	292819186	G	A	148	0	2
1	292819910	A	G	65.5	0	2
1	292820018	A	G	214	0	2
1	292820076	G	A	208	0	2
1	292820365	G	A	154	0	2
1	292820385	C	T	166	0	2
1	292820421	T	C	143	0	2
1	292820431	A	G	114	0	2
1	292821526	G	A	152	0	2
1	292821698	C	T	178	0	2
1	292821709	C	T	210	0	2
1	292821790	G	A	170	0	2
1	292821823	C	T	180	0	2
1	292822221	G	A	209	0	2
1	292822222	C	T	214	0	2
1	292822255	A	G	214	0	2
1	292822689	G	A	209	0	2
1	292822724	G	A	169	0	2
1	292822742	G	A	161	0	2
1	292826537	C	G	211	0	2
1	292826572	G	A	195	0	2
1	292827080	C	A	187	0	2
1	292827851	C	T	129	0	2
1	292827992	T	C	180	0	2
1	292828106	G	A	162	0	2
1	292828189	T	C	95.5	0	2
1	292848671	A	G	210	0	2
1	292848727	T	C	214	0	2
1	292848754	G	A	214	0	2
1	292848795	A	C	214	0	2
1	292849077	T	G	214	0	2
1	292849395	G	C	214	0	2
1	292849458	C	T	214	0	2
1	292849532	A	T	214	0	2
1	292849675	A	G	214	0	2
1	292850610	A	G	214	0	2
1	292850794	T	C	214	0	2
1	292850822	G	A	214	0	2
1	292850872	G	C	214	0	2
1	292851102	C	T	173	0	2
1	292851327	C	T	78.2	0	2
1	292851334	G	A	85.2	0	2
1	292851379	G	A	166	0	2
1	292851402	T	C	202	0	2
1	292851417	T	A	214	0	2
1	292851586	C	T	158	0	2
1	292851602	C	T	184	0	2
1	292851642	T	C	145	0	2
1	292851655	C	A	124	0	2
1	292851750	A	G	71.2	0	2
1	292851776	A	G	99.2	0	2
1	292851815	G	C	81.4	0	2
1	292851925	T	C	214	0	2
1	292852238	A	T	200	0	2
1	292852355	G	C	214	0	2
1	292852429	A	G	214	0	2
1	292852663	A	G	118	0	2
1	292852789	A	G	132	0	2
1	292852820	T	C	140	0	2
1	292852869	G	A	181	0	2
1	292853053	C	T	169	0	2
1	292853426	T	C	214	0	2
1	292853469	G	T	214	0	2
1	292853552	G	T	214	0	2
1	292853906	T	C	214	0	2
1	292853913	A	T	214	0	2
1	292854034	G	A	197	0	2
1	292854092	T	C	214	0	2
1	292854132	T	C	214	0	2
1	292854292	G	A	203	0	2
1	292854311	C	G	162	0	2
1	292854325	T	C	167	0	2
1	292854372	A	G	148	0	2
1	292854376	T	C	151	0	2
1	292854384	G	A	122	0	2
1	292854407	C	T	143	0	2
1	292854527	G	A	138	0	2
1	292854727	T	G	160	0	2
1	292854866	C	T	190	0	2
1	292854875	G	C	189	0	2
1	292854944	G	A	189	0	2
1	292855180	T	C	205	0	2
1	292855191	T	G	214	0	2
1	292855254	G	C	214	0	2
1	292855286	A	T	178	0	2
1	292855295	C	T	155	0	2
1	292855336	A	G	171	0	2
1	292855640	G	A	214	0	2
1	292855652	C	G	188	0	2
1	292855857	T	G	214	0	2
1	292855859	C	T	214	0	2
1	292855909	T	C	191	0	2
1	292855979	C	T	214	0	2
1	292856053	T	C	214	0	2
1	292856436	T	C	214	0	2
1	292857739	A	C	177	0	2
1	292857797	C	T	136	0	2
1	292857872	G	A	177	0	2
1	292858390	A	G	176	0	2
1	292859636	G	A	192	0	2
1	292859710	A	G	214	0	2
1	292862341	G	A	102	0	2
1	292862370	C	T	194	0	2
1	292864493	T	C	92.2	0	2
1	292864626	G	T	82.5	0	2
1	292864995	G	T	50.2	0	2
1	292868671	G	A	186	0	2
1	292868740	C	T	214	0	2
1	292868764	G	A	214	0	2
1	292868782	C	T	213	0	2
1	292868836	C	T	214	0	2
1	292868920	A	G	214	0	2
1	292868935	G	A	214	0	2
1	292868947	T	C	214	0	2
1	292868996	C	T	187	0	2
1	292869333	G	A	214	0	2
1	292869403	G	A	214	0	2
1	292869421	T	C	214	0	2
1	292869553	A	T	206	0	2
1	292869572	G	A	198	0	2
1	292869593	A	G	197	0	2
1	292869620	A	G	214	0	2
1	292869631	T	C	214	0	2
1	292869663	T	C	214	0	2
1	292869732	G	A	214	0	2
1	292869754	C	T	214	0	2
1	292869759	T	C	214	0	2
1	292869840	A	G	214	0	2
1	292869883	G	A	214	0	2
1	292870051	G	A	214	0	2
1	292870067	T	C	214	0	2
1	292870109	G	A	214	0	2
1	292870127	A	G	214	0	2
1	292870359	A	G	214	0	2
1	292870378	A	G	214	0	2
1	292870433	G	A	201	0	2
1	292870474	C	T	214	0	2
1	292870557	C	T	189	0	2
1	292870605	T	C	182	0	2
1	292870644	C	T	214	0	2
1	292870659	T	C	214	0	2
1	292870849	G	A	214	0	2
1	292870966	T	C	214	0	2
1	292870981	T	C	214	0	2
1	292871064	C	T	214	0	2
1	292871316	G	C	214	0	2
1	292871360	A	G	214	0	2
1	292871367	G	A	214	0	2
1	292871383	A	G	199	0	2
1	292871399	A	G	198	0	2
1	292871419	G	A	214	0	2
1	292871425	C	A	214	0	2
1	292871428	C	T	214	0	2
1	292871636	A	C	214	0	2
1	292871660	G	A	214	0	2
1	292871688	C	T	214	0	2
1	292871710	T	C	187	0	2
1	292871711	C	T	196	0	2
1	292871966	C	T	184	0	2
1	292872349	T	C	194	0	2
1	292872658	C	T	214	0	2
1	292872904	G	A	205	0	2
1	292872929	A	G	214	0	2
1	292872955	G	A	214	0	2
1	292872997	G	A	214	0	2
1	292873023	A	G	214	0	2
1	292873068	T	G	214	0	2
1	292873136	A	G	209	0	2
1	292873140	T	A	205	0	2
1	292873151	T	C	214	0	2
1	292873352	G	A	187	0	2
1	292873358	G	A	214	0	2
1	292873368	C	T	214	0	2
1	292873405	A	G	214	0	2
1	292873472	C	A	209	0	2
1	292874031	G	A	208	0	2
1	292874065	A	T	179	0	2
1	292874074	C	T	184	0	2
1	292874084	T	C	200	0	2
1	292874127	G	A	214	0	2
1	292874238	T	C	175	0	2
1	292874306	G	A	199	0	2
1	292874349	C	T	155	0	2
1	292874354	C	T	134	0	2
1	292874391	G	A	165	0	2
1	292874766	G	A	207	0	2
1	292874953	C	T	161	0	2
1	292875193	T	C	214	0	2
1	292880055	G	T	203	0	2
1	292880057	T	C	214	0	2
1	292880058	G	A	214	0	2
1	292880063	A	T	207	0	2
1	292880085	C	G	214	0	2
1	292880204	A	G	214	0	2
1	292880210	A	G	214	0	2
1	292880222	A	G	214	0	2
1	292880311	A	G	214	0	2
1	292880326	G	A	214	0	2
1	292880358	C	T	204	0	2
1	292880688	G	T	214	0	2
1	292880913	G	A	214	0	2
1	292881062	G	A	196	0	2
1	292881069	C	T	197	0	2
1	292881071	G	A	191	0	2
1	292881132	A	T	173	0	2
1	292881181	A	T	214	0	2
1	292881251	G	A	214	0	2
1	292881261	A	T	214	0	2
1	292881303	A	G	214	0	2
1	292881315	A	T	214	0	2
1	292881373	G	A	214	0	2
1	292881385	C	T	214	0	2
1	292881503	A	C	214	0	2
1	292881619	G	A	212	0	2
1	292882616	G	C	187	0	2
1	292884763	C	A	214	0	2
1	292891383	T	C	214	0	2
1	292891406	A	G	214	0	2
1	292893386	C	G	214	0	2
1	292893847	A	G	214	0	2
1	292893863	C	G	214	0	2
1	292893882	G	T	214	0	2
1	292897266	A	G	185	0	2
1	292897269	A	G	198	0	2
1	292927369	C	A	185	0	2
1	292927385	A	G	198	0	2
1	292927540	T	C	206	0	2
1	292927650	T	G	179	0	2
1	292927816	T	A	171	0	2
1	292927878	C	G	214	0	2
1	292927910	A	G	214	0	2
1	292927915	A	G	214	0	2
1	292927947	T	G	209	0	2
1	292928031	T	C	141	0	2
1	292928063	T	G	150	0	2
1	292928069	G	A	136	0	2
1	292928095	T	C	133	0	2
1	292928157	C	T	140	0	2
1	292929723	T	C	214	0	2
1	292930288	A	G	214	0	2
1	292931292	G	A	202	0	2
1	292931326	G	A	214	0	2
1	292931344	A	T	214	0	2
1	292931417	T	C	214	0	2
1	292931477	A	T	211	0	2
1	292931812	G	C	153	0	2
1	292931815	C	T	166	0	2
1	292931825	T	C	189	0	2
1	292931877	A	T	214	0	2
1	292931938	G	T	214	0	2
1	292931976	T	C	214	0	2
1	292932137	T	C	214	0	2
1	292932204	T	A	214	0	2
1	292932247	C	T	214	0	2
1	292932273	T	C	214	0	2
1	292932380	C	T	214	0	2
1	292932433	G	A	201	0	2
1	292932476	G	A	200	0	2
1	292932498	G	A	167	0	2
1	292932510	G	A	162	0	2
1	292932512	G	A	166	0	2
1	292932576	C	G	214	0	2
1	292932961	T	C	214	0	2
1	292933027	C	T	206	0	2
1	292933047	A	G	199	0	2
1	292933099	G	A	214	0	2
1	292933105	G	T	197	0	2
1	292933121	G	A	214	0	2
1	292933207	G	T	214	0	2
1	292933261	A	G	206	0	2
1	292933273	A	C	214	0	2
1	292933279	A	G	214	0	2
1	292933328	A	G	176	0	2
1	292933341	T	C	188	0	2
1	292933393	G	T	214	0	2
1	292933394	A	G	214	0	2
1	292933411	G	C	214	0	2
1	292960913	G	T	214	0	2
1	292960947	T	C	214	0	2
1	292960969	A	G	214	0	2
1	292960998	A	G	214	0	2
1	292961078	A	G	168	0	2
1	292961089	T	C	154	0	2
1	292961097	G	A	120	0	2
1	292961112	A	G	129	0	2
1	292961113	C	T	127	0	2
1	292961285	A	C	214	0	2
1	292961291	G	A	214	0	2
1	292961799	A	C	214	0	2
1	292961871	G	A	214	0	2
1	292961906	T	C	214	0	2
1	292961924	A	G	214	0	2
1	292962479	G	A	155	0	2
1	292962481	T	C	156	0	2
1	292962543	T	C	204	0	2
1	292962559	A	G	195	0	2
1	292962561	A	G	196	0	2
1	292962670	C	T	214	0	2
1	292962707	A	G	191	0	2
1	292962809	G	A	165	0	2
1	292983085	G	C	214	0	2
1	292983121	T	C	214	0	2
1	292983138	G	A	214	0	2
1	292983168	C	T	214	0	2
1	292983187	T	C	214	0	2
1	292983201	T	C	214	0	2
1	292983759	C	A	198	0	2
1	292983782	C	T	212	0	2
1	292983854	C	T	214	0	2
1	292983880	T	C	214	0	2
1	292983902	T	C	214	0	2
1	292983933	T	A	214	0	2
1	292984012	C	G	214	0	2
1	292984043	A	G	148	0	2
1	292984078	A	C	123	0	2
1	292984086	G	A	158	0	2
1	292984463	G	A	214	0	2
1	292984500	T	A	214	0	2
1	292984516	T	C	214	0	2
1	292984562	T	A	203	0	2
1	292984686	A	C	214	0	2
1	292984719	G	C	214	0	2
1	292984738	C	A	214	0	2
1	292984795	A	G	156	0	2
1	292985748	C	G	194	0	2
1	292990020	C	T	214	0	2
1	292990195	G	A	214	0	2
1	292990404	T	C	128	0	2
1	292990405	T	C	128	0	2
1	292990459	A	G	214	0	2
1	292990563	A	G	214	0	2
1	292990921	A	G	214	0	2
1	292991037	T	A	214	0	2
1	292991097	T	G	214	0	2
1	292991194	T	C	191	0	2
1	292991264	T	C	166	0	2
1	292991293	G	C	189	0	2
1	292991312	A	G	212	0	2
1	292991367	G	A	210	0	2
1	292991499	C	T	214	0	2
1	292991505	C	G	214	0	2
1	292991508	G	A	214	0	2
1	292991516	T	C	214	0	2
1	292991754	A	G	145	0	2
1	292991952	G	T	124	0	2
1	292992414	G	A	68.2	0	2
1	292992461	A	G	72.2	0	2
1	292993050	A	G	187	0	2
1	292993145	C	T	214	0	2
1	292993215	A	G	214	0	2
1	292993256	C	G	214	0	2
1	292993276	A	T	214	0	2
1	292993326	C	A	207	0	2
1	292993448	C	A	203	0	2
1	292993472	A	G	213	0	2
1	292993584	T	C	214	0	2
1	292993816	C	T	214	0	2
1	292993945	G	A	214	0	2
1	292994016	A	T	214	0	2
1	292994057	A	G	214	0	2
1	292994118	C	T	123	0	2
1	292994181	T	C	46.3	0	2
1	292994669	G	A	117	0	2
1	292994946	C	T	163	0	2
1	292994980	C	T	214	0	2
1	292995115	C	A	214	0	2
1	292995655	A	G	214	0	2
1	292995673	A	G	214	0	2
1	292995703	G	T	214	0	2
1	292995879	A	G	204	0	2
1	292995919	T	G	214	0	2
1	292995946	G	T	214	0	2
1	292996004	T	G	214	0	2
1	292996009	C	G	214	0	2
1	292996043	A	G	214	0	2
1	292996180	A	G	214	0	2
1	292996268	C	T	214	0	2
1	292996276	G	A	214	0	2
1	292996423	T	A	177	0	2
1	292996689	A	G	211	0	2
1	292996707	C	A	198	0	2
1	292996726	A	G	195	0	2
1	292997319	G	A	214	0	2
1	292997330	C	G	207	0	2
1	292997368	A	G	174	0	2
1	292997969	T	C	214	0	2
1	292998182	A	G	214	0	2
1	292998246	T	A	203	0	2
1	292998272	C	T	205	0	2
1	292998274	G	T	206	0	2
1	292998294	A	G	214	0	2
1	292998355	C	T	214	0	2
1	292998381	G	A	214	0	2
1	292998412	C	T	214	0	2
1	293001571	G	A	214	0	2
1	293001697	T	G	199	0	2
1	293001731	A	G	214	0	2
1	293001743	C	T	214	0	2
1	293001771	T	G	210	0	2
1	293001816	C	T	180	0	2
1	293005574	C	T	148	0	2
1	293008482	C	T	214	0	2
1	293008605	C	A	214	0	2
1	293008624	G	C	214	0	2
1	293008637	G	A	214	0	2
1	293008647	T	A	214	0	2
1	293008689	A	G	214	0	2
1	293009316	A	G	214	0	2
1	293010939	A	T	214	0	2
1	293013056	T	C	214	0	2
1	293016376	G	A	207	0	2
1	293016494	T	G	214	0	2
1	293017341	T	G	206	0	2
1	293020396	A	C	214	0	2
1	293026656	T	C	214	0	2
1	293030107	T	C	214	0	2
1	293042410	G	A	204	0	2
1	293051365	A	G	212	0	2
1	293051369	T	G	214	0	2
1	293051417	C	A	214	0	2
1	293051511	T	C	175	0	2
1	293051899	G	A	164	0	2
1	293051956	A	G	214	0	2
1	293052610	A	C	214	0	2
1	293052636	C	G	214	0	2
1	293052730	A	T	214	0	2
1	293052789	A	T	215	0	2
1	293052843	T	C	214	0	2
1	293052952	C	G	214	0	2
1	293052955	C	A	214	0	2
1	293053072	T	C	214	0	2
1	293053117	G	A	214	0	2
1	293053183	G	A	214	0	2
1	293053256	G	A	214	0	2
1	293053305	A	G	214	0	2
1	293053316	G	A	214	0	2
1	293053374	C	T	214	0	2
1	293053488	A	T	214	0	2
1	293053502	G	A	214	0	2
1	293053585	G	C	214	0	2
1	293053638	T	C	214	0	2
1	293053940	A	G	126	0	2
1	293054063	C	T	214	0	2
1	293054141	T	A	192	0	2
1	293054166	G	T	214	0	2
1	293054190	T	A	214	0	2
1	293054371	T	C	214	0	2
1	293054381	G	A	214	0	2
1	293054455	A	G	214	0	2
1	293054463	A	C	214	0	2
1	293054478	A	G	214	0	2
1	293054564	A	G	214	0	2
1	293054619	C	T	214	0	2
1	293054652	C	T	214	0	2
1	293054689	T	G	214	0	2
1	293054821	T	G	214	0	2
1	293055176	G	A	214	0	2
1	293055546	C	A	152	0	2
1	293055571	C	T	200	0	2
1	293056375	C	T	214	0	2
1	293057288	T	C	215	0	2
1	293057297	C	T	214	0	2
1	293057319	C	T	214	0	2
1	293057376	C	T	215	0	2
1	293057396	C	T	214	0	2
1	293057413	T	C	167	0	2
1	293057435	C	T	169	0	2
1	293057446	G	A	146	0	2
1	293057451	C	T	146	0	2
1	293057456	G	A	146	0	2
1	293057458	G	A	134	0	2
1	293057787	C	A	194	0	2
1	293057911	C	T	206	0	2
1	293058563	A	C	214	0	2
1	293058635	C	G	214	0	2
1	293058659	G	T	214	0	2
1	293058740	A	G	200	0	2
1	293058813	T	A	214	0	2
1	293058827	A	G	214	0	2
1	293058884	T	C	214	0	2
1	293058941	C	G	180	0	2
1	293058960	T	G	176	0	2
1	293059292	C	T	143	0	2
1	293059423	T	C	199	0	2
1	293059430	G	A	214	0	2
1	293059646	G	A	214	0	2
1	293060182	T	C	182	0	2
1	293060211	T	C	174	0	2
1	293060226	A	G	200	0	2
1	293060228	C	T	178	0	2
1	293060305	C	T	214	0	2
1	293060356	A	C	214	0	2
1	293060375	C	T	194	0	2
1	293060910	A	G	148	0	2
1	293087013	T	A	146	0	2
1	293087019	C	T	144	0	2
1	293087022	A	G	136	0	2
1	293087227	C	A	88.2	0	2
1	293087527	A	C	90.2	0	2
1	293087553	C	A	111	0	2
1	293087571	C	T	98.2	0	2
1	293133193	A	G	150	0	2
1	293133249	G	A	214	0	2
1	293133250	C	A	214	0	2
1	293133328	C	T	214	0	2
1	293133400	C	T	214	0	2
1	293133417	A	G	202	0	2
1	293133627	A	T	207	0	2
1	293135570	G	A	177	0	2
1	293135573	T	C	173	0	2
1	293135653	A	C	214	0	2
1	293135656	G	T	214	0	2
1	293135779	C	T	214	0	2
1	293135842	G	C	214	0	2
1	293135843	T	C	214	0	2
1	293135982	C	T	214	0	2
1	293136000	C	T	214	0	2
1	293136013	C	G	214	0	2
1	293136076	T	G	214	0	2
1	293136316	G	T	214	0	2
1	293136339	T	C	214	0	2
1	293136378	T	A	214	0	2
1	293136416	C	T	214	0	2
1	293136642	A	T	214	0	2
1	293136679	C	G	214	0	2
1	293136746	G	A	215	0	2
1	293136846	T	C	214	0	2
1	293136884	A	G	215	0	2
1	293136887	T	C	215	0	2
1	293136902	T	C	214	0	2
1	293136903	T	G	214	0	2
1	293138094	G	A	214	0	2
1	293138644	A	G	214	0	2
1	293138698	A	G	211	0	2
1	293138704	T	C	212	0	2
1	293138727	T	C	155	0	2
1	293139021	A	T	214	0	2
1	293139038	A	G	214	0	2
1	293139153	T	C	214	0	2
1	293139937	G	A	214	0	2
1	293139976	A	T	190	0	2
1	293140721	T	G	146	0	2
1	293141157	A	C	214	0	2
1	293141191	T	C	214	0	2
1	293141207	A	C	214	0	2
1	293141275	T	G	214	0	2
1	293141294	C	T	214	0	2
1	293141334	C	T	214	0	2
1	293141394	G	T	214	0	2
1	293141626	A	G	209	0	2
1	293141951	A	G	201	0	2
1	293142343	G	T	214	0	2
1	293142437	G	T	59.5	0	2
1	293142877	T	C	201	0	2
1	293144430	C	T	214	0	2
1	293144475	G	A	214	0	2
1	293144503	G	C	214	0	2
1	293144673	C	G	207	0	2
1	293144722	G	A	214	0	2
1	293145164	T	A	214	0	2
1	293145517	A	C	214	0	2
1	293145522	C	T	214	0	2
1	293145531	C	A	212	0	2
1	293145551	C	T	205	0	2
1	293145642	G	A	164	0	2
1	293145653	A	G	141	0	2
1	293145815	C	T	214	0	2
1	293145867	G	A	214	0	2
1	293145873	G	A	214	0	2
1	293145902	A	G	214	0	2
1	293145983	A	C	214	0	2
1	293146111	G	A	214	0	2
1	293146151	C	G	214	0	2
1	293146340	A	G	214	0	2
1	293146443	A	C	214	0	2
1	293146456	C	A	214	0	2
1	293146492	A	G	214	0	2
1	293146709	C	T	214	0	2
1	293146773	T	C	214	0	2
1	293146799	T	G	214	0	2
1	293146863	C	A	214	0	2
1	293147009	G	A	214	0	2
1	293147141	T	A	214	0	2
1	293147244	G	A	214	0	2
1	293147250	A	G	214	0	2
1	293147336	A	G	214	0	2
1	293147380	A	G	214	0	2
1	293147845	C	G	214	0	2
1	293147886	A	C	214	0	2
1	293148085	C	T	214	0	2
1	293148251	A	T	214	0	2
1	293148290	A	G	214	0	2
1	293148368	G	A	214	0	2
1	293148432	A	C	214	0	2
1	293148456	C	G	214	0	2
1	293148726	C	T	213	0	2
1	293148869	A	G	214	0	2
1	293148954	C	G	214	0	2
1	293149037	G	T	169	0	2
1	293149063	A	G	154	0	2
1	293149190	A	G	214	0	2
1	293150144	C	T	145	0	2
1	293150170	T	C	214	0	2
1	293150193	T	C	214	0	2
1	293150525	G	A	210	0	2
1	293150552	A	G	149	0	2
1	293151079	G	T	214	0	2
1	293151274	C	T	211	0	2
1	293151317	A	C	214	0	2
1	293151358	T	C	214	0	2
1	293151982	A	C	214	0	2
1	293152077	T	G	214	0	2
1	293152227	C	T	185	0	2
1	295155752	G	A	999	2	0
1	295485332	A	T	999	2	0
1	300623299	T	C	214	0	2
2	2867781	G	A	117	2	0
2	4165483	T	A	214	0	2
2	4708115	C	T	214	0	2
2	4753790	G	A	999	2	0
2	5226680	A	G	186	0	2
2	5851212	G	A	214	0	2
2	9797783	C	G	123	0	2
2	12301453	C	T	214	0	2
2	16222547	A	G	191	0	2
2	16367192	C	A	214	0	2
2	16662053	T	C	187	0	2
2	18051800	C	T	185	0	2
2	18448275	C	T	90.5	0	2
2	18576271	G	A	999	2	0
2	18770855	T	C	208	0	2
2	20794312	G	A	214	0	2
2	21140324	C	A	214	0	2
2	21846928	C	T	214	0	2
2	22337612	A	G	214	0	2
2	22846765	C	T	999	2	0
2	23459648	C	T	999	2	0
2	25911509	C	T	999	2	0
2	28355525	C	T	999	2	0
2	28915370	C	T	999	2	0
2	30027497	C	T	212	0	2
2	30782790	T	C	172	0	2
2	31457142	A	T	214	0	2
2	32193257	T	C	212	0	2
2	35478717	C	T	214	0	2
2	36549996	C	T	214	0	2
2	37687913	G	A	156	2	0
2	37812979	G	T	214	0	2
2	38927933	C	T	999	2	0
2	39246220	C	T	999	2	0
2	43953884	A	G	197	0	2
2	46267319	G	C	203	0	2
2	47848810	C	A	999	2	0
2	48089906	A	G	214	0	2
2	48321499	C	T	999	2	0
2	49680345	G	A	214	0	2
2	52857470	C	T	999	2	0
2	54780612	C	G	214	0	2
2	54837133	C	T	999	2	0
2	56159427	G	A	214	0	2
2	56914659	G	A	103	0	2
2	57187470	T	C	213	0	2
2	57658827	T	C	214	0	2
2	58288337	G	A	214	0	2
2	61396113	G	A	999	2	0
2	63397431	C	T	214	0	2
2	69230837	C	T	187	0	2
2	73726244	C	T	110	0	2
2	73769789	C	T	214	0	2
2	75728819	G	T	999	2	0
2	75736279	A	G	214	0	2
2	76959520	C	T	214	0	2
2	78944973	C	T	999	2	0
2	79973292	T	C	163	0	2
2	81103117	A	G	214	0	2
2	82853659	T	G	214	0	2
2	83403901	C	T	999	2	0
2	85188330	A	G	214	0	2
2	86148259	G	A	214	0	2
2	88435634	A	G	178	0	2
2	90571305	T	A	214	0	2
2	90626961	C	T	999	2	0
2	92461458	A	G	214	0	2
2	93363347	G	A	214	0	2
2	96131835	C	T	214	0	2
2	96824602	T	C	214	0	2
2	96858816	C	T	214	0	2
2	98403910	G	A	999	2	0
2	98618061	C	T	212	0	2
2	99092554	C	T	112	0	2
2	99281096	C	T	214	0	2
2	101255127	C	T	214	0	2
2	105282361	C	T	214	0	2
2	109753855	T	C	214	0	2
2	110620619	G	A	999	2	0
2	111060402	G	A	999	2	0
2	111673717	G	A	214	0	2
2	115174469	G	A	209	0	2
2	115668171	G	A	999	2	0
2	116062965	G	C	214	0	2
2	116165513	G	A	147	0	2
2	117355171	G	A	999	2	0
2	117968454	G	A	214	0	2
2	118760943	T	C	214	0	2
2	118853435	G	A	214	0	2
2	119384133	C	T	214	0	2
2	119622824	T	C	214	0	2
2	121250513	A	G	999	2	0
2	123851275	G	A	999	2	0
2	124601887	T	A	214	0	2
2	124901681	C	A	62.4	0	2
2	125193932	G	A	210	0	2
2	125650856	T	A	164	0	2
2	125951980	A	T	214	0	2
2	129331562	G	T	127	0	2
2	129976308	T	C	146	0	2
2	132593476	T	A	214	0	2
2	132606625	G	T	999	2	0
2	132982220	G	T	214	0	2
2	133699088	C	T	214	0	2
2	135551244	G	A	999	2	0
2	139727380	C	T	214	0	2
2	140882205	G	A	207	0	2
2	141623594	C	T	193	0	2
2	145045754	C	T	193	0	2
2	145413437	G	C	131	0	2
2	149003002	G	A	214	0	2
2	150512746	C	A	201	0	2
2	151279373	A	C	186	0	2
2	152424585	G	A	121	2	0
2	154756159	C	A	999	2	0
2	156584040	T	C	214	0	2
2	156706455	C	T	107	2	0
2	159093661	C	T	147	0	2
2	161159084	C	T	999	2	0
2	162367425	G	T	214	0	2
2	167756974	C	T	999	2	0
2	169951450	G	T	74.2	0	2
2	170682827	C	T	214	0	2
2	173609848	G	A	214	0	2
2	174343745	C	T	214	0	2
2	174742800	G	C	108	0	2
2	175745677	C	T	214	0	2
2	177346089	C	T	87.2	2	0
2	177645914	A	G	214	0	2
2	180287895	G	C	155	0	2
2	180553250	C	T	999	2	0
2	180980731	A	G	143	0	2
2	181412669	C	T	214	0	2
2	192298869	C	A	154	0	2
2	193526552	G	A	120	0	2
2	195008317	G	A	183	0	2
2	200631257	G	A	214	0	2
2	202263967	G	A	999	2	0
2	203415297	C	T	148	0	2
2	204946631	C	A	214	0	2
2	207414070	C	T	153	2	0
2	208562505	C	T	117	0	2
2	211367395	G	A	132	2	0
2	217216194	C	T	121	0	2
2	218547281	C	T	159	0	2
2	223080726	G	A	999	2	0
2	224520578	G	C	214	0	2
2	228678670	C	T	999	2	0
2	231993974	T	C	999	2	0
2	235594608	C	T	999	2	0
2	236496247	G	A	214	0	2
2	236822216	C	T	215	0	2
3	1106330	A	G	214	0	2
3	2521436	C	T	214	0	2
3	2835694	G	T	999	2	0
3	3499472	G	T	214	0	2
3	7693182	C	T	999	2	0
3	8298725	A	C	214	0	2
3	9267478	G	A	999	2	0
3	10557895	G	A	177	0	2
3	13917264	C	T	999	2	0
3	14431578	G	A	165	0	2
3	14475951	C	T	214	0	2
3	16106626	C	G	999	2	0
3	23805809	G	A	141	0	2
3	24425914	G	A	214	0	2
3	25816137	C	T	999	2	0
3	25877567	A	T	999	2	0
3	27251691	G	A	189	0	2
3	28493366	G	A	999	2	0
3	34018672	G	A	999	2	0
3	35246059	C	T	148	2	0
3	35466584	T	A	999	2	0
3	35466585	C	A	999	2	0
3	35679112	C	T	111	2	0
3	36304074	A	G	214	0	2
3	36808604	C	T	214	0	2
3	40386594	G	A	999	2	0
3	41317085	G	A	214	0	2
3	42015120	A	C	214	0	2
3	43041280	G	A	999	2	0
3	43563151	G	T	214	0	2
3	43706873	G	T	127	0	2
3	46524679	T	C	214	0	2
3	50409351	A	G	192	0	2
3	50603466	C	T	999	2	0
3	52128599	T	C	999	2	0
3	54403021	A	C	141	0	2
3	55373740	C	A	214	0	2
3	55373741	C	T	214	0	2
3	55705381	G	A	214	0	2
3	56704145	C	G	203	0	2
3	56813729	T	G	999	2	0
3	57443495	C	T	214	0	2
3	59057750	C	T	999	2	0
3	59934781	T	C	75.2	0	2
3	61356646	A	G	214	0	2
3	61930529	C	T	999	2	0
3	63326410	C	T	127	0	2
3	63584489	G	A	999	2	0
3	64331426	G	A	214	0	2
3	66574813	C	T	157	0	2
3	67086910	G	A	99.5	2	0
3	68029318	C	T	153	0	2
3	68127775	G	A	999	2	0
3	68564345	G	A	999	2	0
3	70164828	T	G	184	0	2
3	72990748	G	A	120	2	0
3	73924979	C	T	999	2	0
3	74208661	T	G	214	0	2
3	75355332	G	A	143	0	2
3	75570328	C	T	214	0	2
3	75876819	G	T	214	0	2
3	76048335	A	T	999	2	0
3	76447182	C	A	214	0	2
3	76764860	G	T	209	0	2
3	76771666	G	T	213	0	2
3	83925400	T	C	214	0	2
3	84527346	C	T	214	0	2
3	86832135	C	T	187	0	2
3	88307057	T	C	94.5	0	2
3	89000559	C	T	999	2	0
3	90439551	C	T	999	2	0
3	91724810	C	G	999	2	0
3	92177406	C	T	214	0	2
3	96055449	C	T	214	0	2
3	99613873	G	A	203	0	2
3	101876368	C	T	180	0	2
3	104141291	G	A	214	0	2
3	104559346	T	G	214	0	2
3	104999205	G	A	999	2	0
3	108484344	G	A	202	0	2
3	110103259	C	T	999	2	0
3	110633863	T	A	214	0	2
3	111144603	G	T	70.5	0	2
3	112703389	C	T	999	2	0
3	113728937	G	A	96.2	0	2
3	115122014	C	T	214	0	2
3	116183563	A	T	214	0	2
3	118676330	G	A	175	0	2
3	119533777	G	T	142	2	0
3	121966487	G	T	999	2	0
3	122006012	C	A	159	0	2
3	124097015	A	G	214	0	2
3	124348710	C	T	999	2	0
3	126380178	C	T	999	2	0
3	131686807	G	C	999	2	0
3	133116410	C	T	206	0	2
3	133257462	T	C	162	0	2
3	136376580	C	T	214	0	2
3	136864774	G	A	999	2	0
3	138849532	G	A	214	0	2
3	139454077	G	A	161	0	2
3	139543694	C	T	137	0	2
3	139592330	G	A	214	0	2
3	139936499	G	A	149	0	2
3	141013539	C	T	124	0	2
3	141616427	T	G	176	0	2
3	144215156	G	A	999	2	0
3	146211496	G	A	999	2	0
3	147570439	G	T	202	0	2
3	147809624	G	A	214	0	2
3	148792995	G	A	202	0	2
3	148884657	G	A	214	0	2
3	151164497	G	A	144	0	2
3	151783544	T	A	130	0	2
3	151903390	T	A	214	0	2
3	153280113	G	A	999	2	0
3	153956517	G	A	177	0	2
3	155243285	C	T	999	2	0
3	156688037	C	T	214	0	2
3	157495764	T	C	214	0	2
3	157987570	C	T	157	0	2
3	163988413	C	T	214	0	2
3	164474251	T	C	206	0	2
3	164659140	G	A	87.8	0	2
3	166448581	A	C	999	2	0
3	167100086	A	T	168	0	2
3	167897717	C	G	215	0	2
3	169120664	G	A	172	0	2
3	170926584	A	G	127	2	0
3	171085956	G	T	999	2	0
3	171904153	C	A	999	2	0
3	171935516	A	G	999	2	0
3	174793304	C	T	95.3	2	0
3	175194219	C	T	214	0	2
3	178512061	C	T	133	0	2
3	180437931	G	A	214	0	2
3	195296715	C	T	125	0	2
3	202263185	T	C	214	0	2
3	206156060	C	A	214	0	2
3	206515653	C	T	999	2	0
3	207222813	G	A	999	2	0
3	208315332	A	G	58.5	0	2
3	209487767	G	A	999	2	0
3	209603382	T	A	71.2	2	0
3	209603405	C	T	45.2	2	0
3	211847726	A	G	214	0	2
3	212688193	G	T	214	0	2
3	213825409	G	A	48.5	0	2
3	214128636	G	A	214	0	2
3	214320368	C	A	214	0	2
3	216156051	C	T	214	0	2
3	216444750	T	C	999	2	0
3	217156559	G	A	999	2	0
3	219298930	C	T	49.4	0	2
3	220164075	A	C	214	0	2
3	220439525	G	A	214	0	2
3	221159919	C	T	214	0	2
3	222882864	G	A	153	0	2
3	226431889	T	C	214	0	2
3	228475941	C	T	214	0	2
3	229598948	C	T	214	0	2
3	231517035	C	T	192	0	2
3	231553568	G	A	118	0	2
4	2186441	C	T	214	0	2
4	6873828	T	G	168	0	2
4	8568608	G	A	214	0	2
4	9235597	G	A	151	0	2
4	10157732	T	G	214	0	2
4	18133765	C	T	999	2	0
4	18184799	A	T	152	0	2
4	18440575	G	A	999	2	0
4	19537052	A	G	84.2	0	2
4	21317567	C	G	214	0	2
4	22493032	C	T	999	2	0
4	24685418	G	A	214	0	2
4	30174823	C	T	214	0	2
4	31178440	A	T	214	0	2
4	31275977	C	T	214	0	2
4	33382662	C	T	999	2	0
4	33807368	A	G	209	0	2
4	34830475	T	C	214	0	2
4	35827347	G	T	999	2	0
4	36221396	A	T	999	2	0
4	36582308	C	A	214	0	2
4	38059005	G	A	999	2	0
4	42992554	G	A	214	0	2
4	43380770	G	A	999	2	0
4	44092515	C	A	156	0	2
4	44515852	C	T	214	0	2
4	45764038	C	T	215	0	2
4	49394074	A	G	214	0	2
4	50275377	G	A	138	2	0
4	51388959	C	A	999	2	0
4	52328886	T	C	214	0	2
4	53314409	C	T	999	2	0
4	55311700	C	T	214	0	2
4	56706453	C	T	68.2	0	2
4	56814212	A	T	214	0	2
4	57464056	C	T	214	0	2
4	57727861	G	A	212	0	2
4	60111273	C	T	214	0	2
4	62606720	G	A	53.1	2	0
4	63262404	T	A	159	0	2
4	64699073	C	T	214	0	2
4	66018723	C	T	214	0	2
4	66482870	G	A	88.2	2	0
4	67000448	C	T	999	2	0
4	67409151	G	A	999	2	0
4	67449271	T	C	214	0	2
4	67592636	T	C	144	0	2
4	69942154	G	A	999	2	0
4	72884865	T	C	214	0	2
4	74149928	C	G	214	0	2
4	74262548	T	C	214	0	2
4	75309939	A	C	214	0	2
4	77098542	G	A	189	0	2
4	77798553	C	T	171	0	2
4	78179488	T	G	159	0	2
4	79191423	C	T	157	0	2
4	79465663	A	G	172	0	2
4	80054084	C	A	999	2	0
4	80224872	C	T	214	0	2
4	85052120	G	A	214	0	2
4	86063858	C	T	214	0	2
4	86323007	C	A	999	2	0
4	89091559	G	A	999	2	0
4	89843023	C	T	214	0	2
4	91360156	G	A	94.2	0	2
4	91375152	T	C	214	0	2
4	92022005	C	A	212	0	2
4	92256311	T	A	999	2	0
4	92906437	C	T	214	0	2
4	93883208	C	T	999	2	0
4	96411594	G	T	999	2	0
4	99102191	C	T	214	0	2
4	101105047	G	A	999	2	0
4	102545727	C	T	138	2	0
4	102830085	A	G	214	0	2
4	104984409	G	T	999	2	0
4	105032078	C	T	999	2	0
4	105917100	C	T	999	2	0
4	106721071	T	G	999	2	0
4	107675053	C	T	214	0	2
4	108736985	C	T	198	0	2
4	109066382	G	C	999	2	0
4	110138838	C	T	214	0	2
4	110374988	G	A	999	2	0
4	110633971	A	G	214	0	2
4	110843371	G	A	214	0	2
4	111476917	C	T	214	0	2
4	112219520	T	C	209	0	2
4	112694179	C	T	214	0	2
4	113480575	G	A	214	0	2
4	114282921	T	C	214	0	2
4	114451295	G	A	999	2	0
4	116186520	G	A	999	2	0
4	116308185	G	A	56.4	0	2
4	118825645	G	T	214	0	2
4	120378035	G	A	214	0	2
4	124174625	G	A	214	0	2
4	124183550	G	A	213	0	2
4	128515761	C	T	999	2	0
4	129478244	A	C	999	2	0
4	129490087	G	A	214	0	2
4	129511911	G	A	999	2	0
4	130655180	C	T	999	2	0
4	131832080	G	A	214	0	2
4	131942425	G	A	214	0	2
4	132834609	G	C	214	0	2
4	135616848	T	C	214	0	2
4	137233532	G	A	214	0	2
4	137353439	G	A	193	0	2
4	137588866	C	T	214	0	2
4	137873548	G	A	180	0	2
4	141130636	G	A	173	0	2
4	142169378	T	G	214	0	2
4	142581486	C	G	214	0	2
4	142952947	G	A	999	2	0
4	143789886	A	G	155	0	2
4	145375514	T	C	101	2	0
4	147886458	G	A	214	0	2
4	148524389	G	A	214	0	2
4	149953690	G	A	999	2	0
4	152216028	A	T	214	0	2
4	152839986	C	T	214	0	2
4	154835737	G	A	205	0	2
4	154880936	G	A	132	2	0
4	158507861	C	T	168	0	2
4	160291146	G	A	214	0	2
4	163969426	C	T	999	2	0
4	166229240	C	A	999	2	0
4	171321565	C	A	132	0	2
4	179573507	T	C	212	0	2
4	182587906	A	G	214	0	2
4	182663678	G	A	193	0	2
4	184093414	G	A	999	2	0
4	188410445	G	A	999	2	0
4	188798803	A	G	999	2	0
4	193447947	C	T	999	2	0
4	194409402	T	C	214	0	2
4	195894408	C	A	211	0	2
4	200183931	G	C	999	2	0
4	200893198	A	C	999	2	0
4	202640879	G	A	999	2	0
4	202995531	A	G	214	0	2
4	203132109	G	A	999	2	0
4	203910082	G	A	214	0	2
4	204385069	C	A	214	0	2
4	205536531	A	G	147	2	0
4	205642719	C	T	999	2	0
4	210321582	A	G	214	0	2
4	211686722	G	A	211	0	2
4	211754886	G	A	214	0	2
4	214425017	C	T	214	0	2
4	214967455	G	A	214	0	2
4	220405790	C	T	214	0	2
4	221011818	A	G	202	0	2
4	224268671	C	T	152	0	2
4	227350809	C	A	180	0	2
4	228007853	A	G	202	0	2
4	228105304	G	T	999	2	0
4	228224821	C	A	146	0	2
4	229112130	C	T	999	2	0
4	230152330	G	A	115	2	0
4	232339023	G	A	214	0	2
4	232865398	T	C	148	0	2
4	233163773	G	A	999	2	0
4	234367469	C	T	201	0	2
4	235921537	C	T	139	2	0
4	237609208	G	A	214	0	2
4	239522582	C	T	214	0	2
5	3476758	C	T	99.8	0	2
5	3807253	G	T	999	2	0
5	4766523	G	C	214	0	2
5	7342728	G	A	999	2	0
5	7548751	C	T	178	0	2
5	14057143	C	T	214	0	2
5	15481920	C	T	999	2	0
5	19620679	G	A	999	2	0
5	21022595	A	G	88.2	0	2
5	23761394	A	G	214	0	2
5	23890666	C	T	214	0	2
5	24735401	C	T	110	0	2
5	29166791	G	A	202	0	2
5	31086821	G	C	213	0	2
5	32734658	T	C	214	0	2
5	32850895	G	A	214	0	2
5	33399240	C	T	103	0	2
5	35729080	C	T	214	0	2
5	35845634	G	A	204	0	2
5	36523195	T	C	103	2	0
5	37242420	C	T	214	0	2
5	43234166	C	T	215	0	2
5	45835011	C	G	181	0	2
5	47037149	G	A	999	2	0
5	47362961	C	T	999	2	0
5	49049989	C	T	169	0	2
5	49290990	C	G	214	0	2
5	56090856	C	T	199	0	2
5	56400313	G	T	122	2	0
5	63491108	C	T	67.5	2	0
5	66749862	G	A	202	0	2
5	67106768	G	T	93	0	2
5	68966093	G	A	160	0	2
5	70436391	G	C	214	0	2
5	71385710	C	G	210	0	2
5	75272952	C	A	214	0	2
5	76325023	C	T	215	0	2
5	82104732	G	A	203	0	2
5	82938249	G	A	999	2	0
5	85850143	G	A	214	0	2
5	87825729	T	C	214	0	2
5	89337473	G	C	999	2	0
5	89339299	G	A	214	0	2
5	91238797	G	A	214	0	2
5	91683666	G	A	183	0	2
5	93282545	C	T	999	2	0
5	93929145	G	A	45	0	2
5	94519014	A	T	145	0	2
5	94543699	A	G	214	0	2
5	95917169	G	A	214	0	2
5	96165867	A	G	193	0	2
5	97747650	C	T	214	0	2
5	98996621	G	T	193	0	2
5	99685840	C	T	181	0	2
5	99801506	T	A	214	0	2
5	103037521	C	T	174	0	2
5	103162665	G	A	214	0	2
5	105354122	G	T	214	0	2
5	105827160	A	G	214	0	2
5	108287780	T	C	214	0	2
5	108625306	C	T	214	0	2
5	114348005	T	G	214	0	2
5	114696489	C	T	42.3	0	2
5	114705386	C	T	214	0	2
5	115784022	G	A	212	0	2
5	116219404	G	A	189	0	2
5	121381234	G	T	214	0	2
5	122102786	C	T	122	0	2
5	123576713	C	T	214	0	2
5	127566564	C	T	207	0	2
5	128495231	G	A	214	0	2
5	133840510	G	T	214	0	2
5	138021782	C	A	999	2	0
5	138307473	C	T	204	0	2
5	138499241	G	A	206	0	2
5	139805037	A	G	214	0	2
5	140895183	C	T	147	0	2
5	141459047	C	T	213	0	2
5	144408110	G	A	156	0	2
5	145567589	G	A	191	0	2
5	146364691	G	C	999	2	0
5	147151158	C	T	214	0	2
5	147248539	C	T	214	0	2
5	151504586	C	T	214	0	2
5	154520131	G	A	999	2	0
5	158105218	C	T	191	0	2
5	159445966	C	T	205	0	2
5	159475508	G	A	214	0	2
5	159907696	C	T	214	0	2
5	160584820	A	G	175	0	2
5	161541647	C	T	91.2	0	2
5	168836961	C	T	214	0	2
5	169621305	A	G	158	0	2
5	171668997	T	C	150	0	2
5	172706459	A	G	999	2	0
5	172722625	C	T	999	2	0
5	172871369	G	A	196	0	2
5	174541061	T	C	214	0	2
5	176168710	G	A	178	0	2
5	176249803	G	A	214	0	2
5	177709368	G	A	214	0	2
5	184106198	C	T	214	0	2
5	186347073	G	A	46.3	0	2
5	187493589	G	A	201	0	2
5	187533822	T	C	175	0	2
5	190852288	T	C	187	0	2
5	190878653	G	A	40.2	0	2
5	190932832	T	C	214	0	2
5	191112737	T	C	214	0	2
5	191224877	G	A	139	0	2
5	195940044	C	T	214	0	2
5	197681881	A	G	191	0	2
5	198077234	C	T	214	0	2
5	204273739	G	A	131	0	2
5	204542266	G	A	214	0	2
5	205068307	T	C	999	2	0
5	208073637	T	C	214	0	2
5	208100832	C	T	214	0	2
5	208101504	C	G	214	0	2
5	208101548	C	G	214	0	2
5	208102875	G	T	214	0	2
5	208102876	G	T	214	0	2
5	208103863	C	G	214	0	2
5	208104053	T	G	197	0	2
5	208104115	A	G	214	0	2
5	208104155	T	C	214	0	2
5	208104682	A	T	197	0	2
5	208104690	G	A	195	0	2
5	208104708	G	A	214	0	2
5	208104721	C	T	214	0	2
5	208104765	T	C	214	0	2
5	208104778	A	C	214	0	2
5	208104803	C	T	214	0	2
5	208104820	G	T	214	0	2
5	208104864	A	G	214	0	2
5	208104953	A	G	160	0	2
5	208105362	A	C	214	0	2
5	208105559	T	G	174	0	2
5	208106108	C	T	160	0	2
5	208158952	T	C	214	0	2
5	208158959	C	T	214	0	2
5	208158984	A	G	214	0	2
5	208160484	C	T	206	0	2
5	208160570	A	G	214	0	2
5	208160573	A	G	214	0	2
5	208160652	G	A	198	0	2
5	208161860	C	A	207	0	2
5	208161950	C	T	214	0	2
5	208161957	G	A	214	0	2
5	208161995	A	G	171	0	2
5	208162489	T	C	193	0	2
5	208162530	G	A	178	0	2
5	208162595	C	G	213	0	2
5	208162609	A	C	211	0	2
5	208162623	C	T	187	0	2
5	208163055	G	A	207	0	2
5	208163078	A	G	214	0	2
5	208163138	T	C	195	0	2
5	208163200	T	C	167	0	2
5	208163240	C	A	209	0	2
5	208163383	C	A	214	0	2
5	208163440	T	C	214	0	2
5	208163465	C	A	214	0	2
5	208163820	G	A	175	0	2
5	208163878	G	T	210	0	2
5	208164015	A	G	214	0	2
5	208164153	G	A	181	0	2
5	208164187	G	A	180	0	2
5	208165159	T	G	184	0	2
5	208165658	G	T	214	0	2
5	208165672	T	A	214	0	2
5	208165709	C	T	214	0	2
5	208165822	C	G	214	0	2
5	208166455	T	G	214	0	2
5	208170055	T	A	142	0	2
5	208170059	G	T	136	0	2
5	208171185	A	T	214	0	2
5	208171663	T	C	210	0	2
5	208171745	G	A	214	0	2
5	208171748	G	T	214	0	2
5	208172294	T	G	214	0	2
5	208172746	T	C	183	0	2
5	208172748	C	T	183	0	2
5	208172788	G	A	214	0	2
5	208172827	G	A	198	0	2
5	208172869	C	T	180	0	2
5	208172914	G	A	150	0	2
5	208173411	A	G	214	0	2
5	208173434	A	G	214	0	2
5	208173488	C	T	214	0	2
5	208173562	A	T	205	0	2
5	208174166	A	C	209	0	2
5	208174986	A	G	214	0	2
5	208175008	G	A	214	0	2
5	208175019	A	G	214	0	2
5	208175069	C	G	214	0	2
5	208175246	C	G	214	0	2
5	208175306	G	A	214	0	2
5	208175638	A	T	192	0	2
5	208175702	A	G	206	0	2
5	208175824	C	T	201	0	2
5	208176101	C	T	214	0	2
5	208176155	A	G	214	0	2
5	208176208	T	C	147	0	2
5	208176230	C	T	214	0	2
5	208176252	C	G	214	0	2
5	208302191	G	A	214	0	2
5	208302246	G	A	214	0	2
5	208302312	T	A	214	0	2
5	208302343	C	T	181	0	2
5	208304843	G	C	173	0	2
5	208304906	C	T	206	0	2
5	208305002	C	T	214	0	2
5	208305043	C	A	214	0	2
5	208305053	A	G	214	0	2
5	208305132	T	C	214	0	2
5	208305153	C	T	214	0	2
5	208306023	A	C	214	0	2
5	208306029	A	G	214	0	2
5	208306049	G	A	214	0	2
5	208306208	T	C	214	0	2
5	208306284	A	G	199	0	2
5	208306319	A	C	203	0	2
5	208313025	T	A	214	0	2
5	208315767	G	A	214	0	2
5	208315949	A	G	177	0	2
5	208315971	A	G	196	0	2
5	208342286	G	C	214	0	2
5	208342444	T	C	214	0	2
5	208342565	A	G	214	0	2
5	208342820	C	A	214	0	2
5	208342958	A	G	208	0	2
5	208343065	A	G	214	0	2
5	208343696	T	C	214	0	2
5	208343733	T	G	214	0	2
5	208343742	G	C	214	0	2
5	208343854	T	C	214	0	2
5	208344034	C	T	190	0	2
5	208345009	C	G	194	0	2
5	208345443	A	G	214	0	2
5	208346198	G	A	214	0	2
5	208346301	C	A	214	0	2
5	208346565	G	A	214	0	2
5	208346606	G	A	214	0	2
5	208346704	C	T	214	0	2
5	208346741	C	T	214	0	2
5	208346780	C	T	214	0	2
5	208346900	C	T	214	0	2
5	208346981	A	C	214	0	2
5	208347037	T	C	214	0	2
5	208347402	T	A	214	0	2
5	208347503	G	A	214	0	2
5	208347628	G	A	214	0	2
5	208348280	T	C	214	0	2
5	208348581	T	A	214	0	2
5	208348739	C	A	145	0	2
5	208349066	T	C	197	0	2
[truncated: 3,616 more rows]
