# Supplementary material for: Sequence and Ionomic Analysis of Divergent Strains of Maize Inbred Line B73 with an Altered Growth Phenotype
Source: PLoS One. 2014 May 7;9(5):e96782. doi: 10.1371/journal.pone.0096782 (PMC4013074; doi:10.1371/journal.pone.0096782)
Supplement: Table S1 — Functional annotation of 5,615 SNP variant sites. (XLS) [file pone.0096782.s004.xls]

## Sheet: 131022_snpeff.out
# SnpEff version SnpEff 3.2a (build 2013-04-11), by Pablo Cingolani
# Chromo	Position	Reference	Change	Change_type	Homozygous	Gene_ID	Gene_name	Bio_type	Trancript_ID	Exon_ID	Exon_Rank	Effect	old_AA/new_AA	Old_codon/New_codon	Codon_Num(CDS)	Codon_Degeneracy	CDS_size	Codons_around	AAs_around	Custom_interval_ID
1	162430350	G	A	SNP	Hom	GRMZM2G546081	GRMZM2G546081		GRMZM2G546081_T01	Exon_1_162430281_162430467	3	SYNONYMOUS_CODING	atC/atT	atC/atT	232	3
1	292238665	C	T	SNP	Hom	GRMZM2G129015	GRMZM2G129015		GRMZM2G129015_T02	Exon_1_292238594_292238678	3	SYNONYMOUS_CODING	gcC/gcT	gcC/gcT	56	4
1	292238665	C	T	SNP	Hom	GRMZM2G129015	GRMZM2G129015		GRMZM2G129015_T01	Exon_1_292238594_292238678	3	SYNONYMOUS_CODING	gcC/gcT	gcC/gcT	56	4
1	292238839	T	C	SNP	Hom	GRMZM2G129015	GRMZM2G129015		GRMZM2G129015_T02	Exon_1_292238769_292238870	4	SYNONYMOUS_CODING	gtT/gtC	gtT/gtC	84	4
1	292238839	T	C	SNP	Hom	GRMZM2G129015	GRMZM2G129015		GRMZM2G129015_T01	Exon_1_292238769_292238899	4	SYNONYMOUS_CODING	gtT/gtC	gtT/gtC	84	4
1	292238845	T	C	SNP	Hom	GRMZM2G129015	GRMZM2G129015		GRMZM2G129015_T02	Exon_1_292238769_292238870	4	SYNONYMOUS_CODING	gtT/gtC	gtT/gtC	86	4
1	292238845	T	C	SNP	Hom	GRMZM2G129015	GRMZM2G129015		GRMZM2G129015_T01	Exon_1_292238769_292238899	4	SYNONYMOUS_CODING	gtT/gtC	gtT/gtC	86	4
1	292277525	T	C	SNP	Hom	GRMZM2G031523	GRMZM2G031523		GRMZM2G031523_T01	Exon_1_292277511_292277598	9	NON_SYNONYMOUS_CODING	Atg/Gtg	Atg/Gtg	505	1
1	292277565	T	C	SNP	Hom	GRMZM2G031523	GRMZM2G031523		GRMZM2G031523_T01	Exon_1_292277511_292277598	9	SYNONYMOUS_CODING	aaA/aaG	aaA/aaG	491	2
1	292278647	A	C	SNP	Hom	GRMZM2G031523	GRMZM2G031523		GRMZM2G031523_T01	Exon_1_292278646_292278765	4	NON_SYNONYMOUS_CODING	aTt/aGt	aTt/aGt	348	1
1	292278647	A	C	SNP	Hom	GRMZM2G031523	GRMZM2G031523		GRMZM2G031523_T02	Exon_1_292278646_292278765	4	NON_SYNONYMOUS_CODING	aTt/aGt	aTt/aGt	348	1
1	292278876	A	G	SNP	Hom	GRMZM2G031523	GRMZM2G031523		GRMZM2G031523_T01	Exon_1_292278849_292278970	3	SYNONYMOUS_CODING	tcT/tcC	tcT/tcC	299	4
1	292278876	A	G	SNP	Hom	GRMZM2G031523	GRMZM2G031523		GRMZM2G031523_T02	Exon_1_292278849_292278970	3	SYNONYMOUS_CODING	tcT/tcC	tcT/tcC	299	4
1	292279857	T	C	SNP	Hom	GRMZM2G031523	GRMZM2G031523		GRMZM2G031523_T01	Exon_1_292279522_292280374	2	NON_SYNONYMOUS_CODING	aAt/aGt	aAt/aGt	156	1
1	292279857	T	C	SNP	Hom	GRMZM2G031523	GRMZM2G031523		GRMZM2G031523_T02	Exon_1_292279522_292280374	2	NON_SYNONYMOUS_CODING	aAt/aGt	aAt/aGt	156	1
1	292280165	G	T	SNP	Hom	GRMZM2G031523	GRMZM2G031523		GRMZM2G031523_T01	Exon_1_292279522_292280374	2	SYNONYMOUS_CODING	cgC/cgA	cgC/cgA	53	4
1	292280165	G	T	SNP	Hom	GRMZM2G031523	GRMZM2G031523		GRMZM2G031523_T02	Exon_1_292279522_292280374	2	SYNONYMOUS_CODING	cgC/cgA	cgC/cgA	53	4
1	292347970	G	A	SNP	Hom	GRMZM2G450920	GRMZM2G450920		GRMZM2G450920_T01	Exon_1_292347758_292348027	8	NON_SYNONYMOUS_CODING	Gct/Act	Gct/Act	567	1
1	292348541	G	C	SNP	Hom	GRMZM2G450920	GRMZM2G450920		GRMZM2G450920_T01	Exon_1_292348160_292348549	9	NON_SYNONYMOUS_CODING	cGt/cCt	cGt/cCt	713	1
1	292348813	T	A	SNP	Hom	GRMZM2G450920	GRMZM2G450920		GRMZM2G450920_T01	Exon_1_292348667_292352553	10	NON_SYNONYMOUS_CODING	Ttt/Att	Ttt/Att	765	1
1	292350143	G	A	SNP	Hom	GRMZM2G450920	GRMZM2G450920		GRMZM2G450920_T01	Exon_1_292348667_292352553	10	NON_SYNONYMOUS_CODING	gGc/gAc	gGc/gAc	1208	1
1	292353074	C	T	SNP	Hom	GRMZM2G450920	GRMZM2G450920		GRMZM2G450920_T01	Exon_1_292353057_292353571	13	SYNONYMOUS_CODING	gaC/gaT	gaC/gaT	2086	2
1	292517531	T	C	SNP	Hom	GRMZM2G139250	GRMZM2G139250		GRMZM2G139250_T01	Exon_1_292516991_292517791	4	NON_SYNONYMOUS_CODING	cAg/cGg	cAg/cGg	306	1
1	292517531	T	C	SNP	Hom	GRMZM2G139250	GRMZM2G139250		GRMZM2G139250_T02	Exon_1_292516995_292517791	4	NON_SYNONYMOUS_CODING	cAg/cGg	cAg/cGg	310	1
1	292517595	C	T	SNP	Hom	GRMZM2G139250	GRMZM2G139250		GRMZM2G139250_T01	Exon_1_292516991_292517791	4	NON_SYNONYMOUS_CODING	Ggc/Agc	Ggc/Agc	285	1
1	292517595	C	T	SNP	Hom	GRMZM2G139250	GRMZM2G139250		GRMZM2G139250_T02	Exon_1_292516995_292517791	4	NON_SYNONYMOUS_CODING	Ggc/Agc	Ggc/Agc	289	1
1	292517671	C	T	SNP	Hom	GRMZM2G139250	GRMZM2G139250		GRMZM2G139250_T01	Exon_1_292516991_292517791	4	SYNONYMOUS_CODING	tcG/tcA	tcG/tcA	259	4
1	292517671	C	T	SNP	Hom	GRMZM2G139250	GRMZM2G139250		GRMZM2G139250_T02	Exon_1_292516995_292517791	4	SYNONYMOUS_CODING	tcG/tcA	tcG/tcA	263	4
1	292517678	A	C	SNP	Hom	GRMZM2G139250	GRMZM2G139250		GRMZM2G139250_T01	Exon_1_292516991_292517791	4	NON_SYNONYMOUS_CODING	gTc/gGc	gTc/gGc	257	1
1	292517678	A	C	SNP	Hom	GRMZM2G139250	GRMZM2G139250		GRMZM2G139250_T02	Exon_1_292516995_292517791	4	NON_SYNONYMOUS_CODING	gTc/gGc	gTc/gGc	261	1
1	292517791	T	C	SNP	Hom	GRMZM2G139250	GRMZM2G139250		GRMZM2G139250_T01	Exon_1_292516991_292517791	4	SYNONYMOUS_CODING	ctA/ctG	ctA/ctG	219	4
1	292517791	T	C	SNP	Hom	GRMZM2G139250	GRMZM2G139250		GRMZM2G139250_T02	Exon_1_292516995_292517791	4	SYNONYMOUS_CODING	ctA/ctG	ctA/ctG	223	4
1	292530492	G	A	SNP	Hom	GRMZM5G826911	GRMZM5G826911		GRMZM5G826911_T01	Exon_1_292530385_292530584	3	SYNONYMOUS_CODING	atC/atT	atC/atT	227	3
1	292665018	T	C	SNP	Hom	AC206259.3_FG002	AC206259.3_FG002		AC206259.3_FGT002	Exon_1_292664512_292666242	2	SYNONYMOUS_CODING	tgT/tgC	tgT/tgC	193	2
1	292665268	T	C	SNP	Hom	AC206259.3_FG002	AC206259.3_FG002		AC206259.3_FGT002	Exon_1_292664512_292666242	2	SYNONYMOUS_CODING	Ttg/Ctg	Ttg/Ctg	277	2
1	292665369	T	G	SNP	Hom	AC206259.3_FG002	AC206259.3_FG002		AC206259.3_FGT002	Exon_1_292664512_292666242	2	NON_SYNONYMOUS_CODING	caT/caG	caT/caG	310	2
1	292666639	C	T	SNP	Hom	AC206259.3_FG002	AC206259.3_FG002		AC206259.3_FGT002	Exon_1_292666284_292667201	3	NON_SYNONYMOUS_CODING	tCt/tTt	tCt/tTt	720	1
1	292666784	T	A	SNP	Hom	AC206259.3_FG002	AC206259.3_FG002		AC206259.3_FGT002	Exon_1_292666284_292667201	3	NON_SYNONYMOUS_CODING	aaT/aaA	aaT/aaA	768	2
1	292880204	A	G	SNP	Hom	AC225147.4_FG002	AC225147.4_FG002		AC225147.4_FGT002	Exon_1_292880129_292880255	3	SYNONYMOUS_CODING	gtT/gtC	gtT/gtC	71	4
1	292880210	A	G	SNP	Hom	AC225147.4_FG002	AC225147.4_FG002		AC225147.4_FGT002	Exon_1_292880129_292880255	3	SYNONYMOUS_CODING	gcT/gcC	gcT/gcC	69	4
1	292880222	A	G	SNP	Hom	AC225147.4_FG002	AC225147.4_FG002		AC225147.4_FGT002	Exon_1_292880129_292880255	3	SYNONYMOUS_CODING	atT/atC	atT/atC	65	3
1	292880358	C	T	SNP	Hom	AC225147.4_FG002	AC225147.4_FG002		AC225147.4_FGT002	Exon_1_292880341_292880496	2	SYNONYMOUS_CODING	ggG/ggA	ggG/ggA	48	4
1	292990020	C	T	SNP	Hom	GRMZM2G155580	GRMZM2G155580		GRMZM2G155580_T03	Exon_1_292988864_292990023	1	SYNONYMOUS_CODING	aaC/aaT	aaC/aaT	327	2
1	292990020	C	T	SNP	Hom	GRMZM2G155580	GRMZM2G155580		GRMZM2G155580_T01	Exon_1_292988864_292990023	1	SYNONYMOUS_CODING	aaC/aaT	aaC/aaT	327	2
1	292990020	C	T	SNP	Hom	GRMZM2G155580	GRMZM2G155580		GRMZM2G155580_T02	Exon_1_292988885_292990023	1	SYNONYMOUS_CODING	aaC/aaT	aaC/aaT	327	2
1	292994669	G	A	SNP	Hom	GRMZM2G155580	GRMZM2G155580		GRMZM2G155580_T03	Exon_1_292994595_292994921	3	SYNONYMOUS_CODING	gaG/gaA	gaG/gaA	431	2
1	292994669	G	A	SNP	Hom	GRMZM2G155580	GRMZM2G155580		GRMZM2G155580_T01	Exon_1_292994595_292994921	3	SYNONYMOUS_CODING	gaG/gaA	gaG/gaA	431	2
1	292994669	G	A	SNP	Hom	GRMZM2G155580	GRMZM2G155580		GRMZM2G155580_T02	Exon_1_292994595_292994921	3	SYNONYMOUS_CODING	gaG/gaA	gaG/gaA	431	2
1	293053117	G	A	SNP	Hom	GRMZM2G155317	GRMZM2G155317		GRMZM2G155317_T01	Exon_1_293052692_293053765	5	NON_SYNONYMOUS_CODING	tCc/tTc	tCc/tTc	600	1
1	293053183	G	A	SNP	Hom	GRMZM2G155317	GRMZM2G155317		GRMZM2G155317_T01	Exon_1_293052692_293053765	5	NON_SYNONYMOUS_CODING	gCa/gTa	gCa/gTa	578	1
1	293053256	G	A	SNP	Hom	GRMZM2G155317	GRMZM2G155317		GRMZM2G155317_T01	Exon_1_293052692_293053765	5	NON_SYNONYMOUS_CODING	Ccc/Tcc	Ccc/Tcc	554	1
1	293053305	A	G	SNP	Hom	GRMZM2G155317	GRMZM2G155317		GRMZM2G155317_T01	Exon_1_293052692_293053765	5	SYNONYMOUS_CODING	ctT/ctC	ctT/ctC	537	4
1	293053316	G	A	SNP	Hom	GRMZM2G155317	GRMZM2G155317		GRMZM2G155317_T01	Exon_1_293052692_293053765	5	NON_SYNONYMOUS_CODING	Cca/Tca	Cca/Tca	534	1
1	293053374	C	T	SNP	Hom	GRMZM2G155317	GRMZM2G155317		GRMZM2G155317_T01	Exon_1_293052692_293053765	5	SYNONYMOUS_CODING	ccG/ccA	ccG/ccA	514	4
1	293053488	A	T	SNP	Hom	GRMZM2G155317	GRMZM2G155317		GRMZM2G155317_T01	Exon_1_293052692_293053765	5	NON_SYNONYMOUS_CODING	gaT/gaA	gaT/gaA	476	2
1	293053502	G	A	SNP	Hom	GRMZM2G155317	GRMZM2G155317		GRMZM2G155317_T01	Exon_1_293052692_293053765	5	NON_SYNONYMOUS_CODING	Cac/Tac	Cac/Tac	472	1
1	293053585	G	C	SNP	Hom	GRMZM2G155317	GRMZM2G155317		GRMZM2G155317_T01	Exon_1_293052692_293053765	5	NON_SYNONYMOUS_CODING	tCt/tGt	tCt/tGt	444	1
1	293053638	T	C	SNP	Hom	GRMZM2G155317	GRMZM2G155317		GRMZM2G155317_T01	Exon_1_293052692_293053765	5	SYNONYMOUS_CODING	caA/caG	caA/caG	426	2
1	293053940	A	G	SNP	Hom	GRMZM2G155317	GRMZM2G155317		GRMZM2G155317_T01	Exon_1_293053857_293054007	4	NON_SYNONYMOUS_CODING	gTt/gCt	gTt/gCt	356	1
1	293054371	T	C	SNP	Hom	GRMZM2G155317	GRMZM2G155317		GRMZM2G155317_T01	Exon_1_293054258_293055028	3	NON_SYNONYMOUS_CODING	Agt/Ggt	Agt/Ggt	296	1
1	293054381	G	A	SNP	Hom	GRMZM2G155317	GRMZM2G155317		GRMZM2G155317_T01	Exon_1_293054258_293055028	3	SYNONYMOUS_CODING	tgC/tgT	tgC/tgT	292	2
1	293054455	A	G	SNP	Hom	GRMZM2G155317	GRMZM2G155317		GRMZM2G155317_T01	Exon_1_293054258_293055028	3	NON_SYNONYMOUS_CODING	Tca/Cca	Tca/Cca	268	1
1	293054463	A	C	SNP	Hom	GRMZM2G155317	GRMZM2G155317		GRMZM2G155317_T01	Exon_1_293054258_293055028	3	NON_SYNONYMOUS_CODING	cTg/cGg	cTg/cGg	265	1
1	293054478	A	G	SNP	Hom	GRMZM2G155317	GRMZM2G155317		GRMZM2G155317_T01	Exon_1_293054258_293055028	3	NON_SYNONYMOUS_CODING	aTt/aCt	aTt/aCt	260	1
1	293054564	A	G	SNP	Hom	GRMZM2G155317	GRMZM2G155317		GRMZM2G155317_T01	Exon_1_293054258_293055028	3	SYNONYMOUS_CODING	gcT/gcC	gcT/gcC	231	4
1	293054619	C	T	SNP	Hom	GRMZM2G155317	GRMZM2G155317		GRMZM2G155317_T01	Exon_1_293054258_293055028	3	NON_SYNONYMOUS_CODING	aGc/aAc	aGc/aAc	213	1
1	293054652	C	T	SNP	Hom	GRMZM2G155317	GRMZM2G155317		GRMZM2G155317_T01	Exon_1_293054258_293055028	3	NON_SYNONYMOUS_CODING	cGa/cAa	cGa/cAa	202	1
1	293054689	T	G	SNP	Hom	GRMZM2G155317	GRMZM2G155317		GRMZM2G155317_T01	Exon_1_293054258_293055028	3	NON_SYNONYMOUS_CODING	Aac/Cac	Aac/Cac	190	1
1	293054821	T	G	SNP	Hom	GRMZM2G155317	GRMZM2G155317		GRMZM2G155317_T01	Exon_1_293054258_293055028	3	NON_SYNONYMOUS_CODING	Atc/Ctc	Atc/Ctc	146	1
1	293138094	G	A	SNP	Hom	GRMZM2G061900	GRMZM2G061900		GRMZM2G061900_T03	Exon_1_293138023_293138115	7	SYNONYMOUS_CODING	tcG/tcA	tcG/tcA	94	4
1	293138094	G	A	SNP	Hom	GRMZM2G061900	GRMZM2G061900		GRMZM2G061900_T02	Exon_1_293138023_293138115	8	SYNONYMOUS_CODING	tcG/tcA	tcG/tcA	182	4
1	293138094	G	A	SNP	Hom	GRMZM2G061900	GRMZM2G061900		GRMZM2G061900_T01	Exon_1_293138023_293138115	7	SYNONYMOUS_CODING	tcG/tcA	tcG/tcA	182	4
1	293142343	G	T	SNP	Hom	GRMZM2G061662	GRMZM2G061662		GRMZM2G061662_T01	Exon_1_293142240_293142403	3	SYNONYMOUS_CODING	gcG/gcT	gcG/gcT	111	4
1	293142343	G	T	SNP	Hom	GRMZM2G061662	GRMZM2G061662		GRMZM2G061662_T02	Exon_1_293142240_293142403	3	SYNONYMOUS_CODING	gcG/gcT	gcG/gcT	111	4
1	293145815	C	T	SNP	Hom	GRMZM2G061662	GRMZM2G061662		GRMZM2G061662_T01	Exon_1_293145756_293145835	5	SYNONYMOUS_CODING	aaC/aaT	aaC/aaT	188	2
1	293145815	C	T	SNP	Hom	GRMZM2G061662	GRMZM2G061662		GRMZM2G061662_T02	Exon_1_293145756_293145835	5	SYNONYMOUS_CODING	aaC/aaT	aaC/aaT	188	2
1	293145983	A	C	SNP	Hom	GRMZM2G061662	GRMZM2G061662		GRMZM2G061662_T01	Exon_1_293145934_293146084	6	NON_SYNONYMOUS_CODING	Aat/Cat	Aat/Cat	212	1
1	293145983	A	C	SNP	Hom	GRMZM2G061662	GRMZM2G061662		GRMZM2G061662_T02	Exon_1_293145934_293146084	6	NON_SYNONYMOUS_CODING	Aat/Cat	Aat/Cat	212	1
1	293147380	A	G	SNP	Hom	GRMZM2G061662	GRMZM2G061662		GRMZM2G061662_T01	Exon_1_293147380_293147468	8	NON_SYNONYMOUS_CODING	aAt/aGt	aAt/aGt	277	1
1	293147380	A	G	SNP	Hom	GRMZM2G061662	GRMZM2G061662		GRMZM2G061662_T02	Exon_1_293147380_293147468	8	NON_SYNONYMOUS_CODING	aAt/aGt	aAt/aGt	277	1
1	293148290	A	G	SNP	Hom	GRMZM2G061662	GRMZM2G061662		GRMZM2G061662_T01	Exon_1_293148281_293148443	10	SYNONYMOUS_CODING	gtA/gtG	gtA/gtG	334	4
1	293148290	A	G	SNP	Hom	GRMZM2G061662	GRMZM2G061662		GRMZM2G061662_T02	Exon_1_293148281_293148443	10	SYNONYMOUS_CODING	gtA/gtG	gtA/gtG	334	4
1	293148368	G	A	SNP	Hom	GRMZM2G061662	GRMZM2G061662		GRMZM2G061662_T01	Exon_1_293148281_293148443	10	SYNONYMOUS_CODING	aaG/aaA	aaG/aaA	360	2
1	293148368	G	A	SNP	Hom	GRMZM2G061662	GRMZM2G061662		GRMZM2G061662_T02	Exon_1_293148281_293148443	10	SYNONYMOUS_CODING	aaG/aaA	aaG/aaA	360	2
1	293148432	A	C	SNP	Hom	GRMZM2G061662	GRMZM2G061662		GRMZM2G061662_T01	Exon_1_293148281_293148443	10	SYNONYMOUS_CODING	Aga/Cga	Aga/Cga	382	2
1	293148432	A	C	SNP	Hom	GRMZM2G061662	GRMZM2G061662		GRMZM2G061662_T02	Exon_1_293148281_293148443	10	SYNONYMOUS_CODING	Aga/Cga	Aga/Cga	382	2
1	293148954	C	G	SNP	Hom	GRMZM2G061662	GRMZM2G061662		GRMZM2G061662_T01	Exon_1_293148906_293148991	11	NON_SYNONYMOUS_CODING	Cct/Gct	Cct/Gct	402	1
1	293148954	C	G	SNP	Hom	GRMZM2G061662	GRMZM2G061662		GRMZM2G061662_T02	Exon_1_293148906_293148991	11	NON_SYNONYMOUS_CODING	Cct/Gct	Cct/Gct	402	1
1	293150193	T	C	SNP	Hom	GRMZM2G061662	GRMZM2G061662		GRMZM2G061662_T01	Exon_1_293150175_293150258	12	SYNONYMOUS_CODING	taT/taC	taT/taC	420	2
1	293150193	T	C	SNP	Hom	GRMZM2G061662	GRMZM2G061662		GRMZM2G061662_T03	Exon_1_293150175_293150258	2	SYNONYMOUS_CODING	taT/taC	taT/taC	40	2
1	293150193	T	C	SNP	Hom	GRMZM2G061662	GRMZM2G061662		GRMZM2G061662_T02	Exon_1_293150175_293150258	12	SYNONYMOUS_CODING	taT/taC	taT/taC	420	2
1	293150525	G	A	SNP	Hom	GRMZM2G061662	GRMZM2G061662		GRMZM2G061662_T01	Exon_1_293150351_293150531	13	SYNONYMOUS_CODING	gtG/gtA	gtG/gtA	500	4
1	293150525	G	A	SNP	Hom	GRMZM2G061662	GRMZM2G061662		GRMZM2G061662_T03	Exon_1_293150351_293150531	3	SYNONYMOUS_CODING	gtG/gtA	gtG/gtA	120	4
1	293150525	G	A	SNP	Hom	GRMZM2G061662	GRMZM2G061662		GRMZM2G061662_T02	Exon_1_293150375_293150531	13	SYNONYMOUS_CODING	gtG/gtA	gtG/gtA	492	4
2	145045754	C	T	SNP	Hom	GRMZM2G430607	GRMZM2G430607		GRMZM2G430607_T01	Exon_2_145045588_145046244	2	NON_SYNONYMOUS_CODING	gCc/gTc	gCc/gTc	80	1
2	231993974	T	C	SNP	Hom	GRMZM2G092284	GRMZM2G092284		GRMZM2G092284_T02	Exon_2_231993890_231994144	4	SYNONYMOUS_CODING	acA/acG	acA/acG	322	4
2	231993974	T	C	SNP	Hom	GRMZM2G092284	GRMZM2G092284		GRMZM2G092284_T01	Exon_2_231993890_231994144	4	SYNONYMOUS_CODING	acA/acG	acA/acG	322	4
3	50603466	C	T	SNP	Hom	GRMZM2G170099	GRMZM2G170099		GRMZM2G170099_T01	Exon_3_50603026_50604347	2	NON_SYNONYMOUS_CODING	Cgg/Tgg	Cgg/Tgg	159	2
3	171904153	C	A	SNP	Hom	GRMZM2G467466	GRMZM2G467466		GRMZM2G467466_T01	Exon_3_171904122_171904461	1	NON_SYNONYMOUS_CODING	gaG/gaT	gaG/gaT	103	2
3	195296715	C	T	SNP	Hom	GRMZM2G393716	GRMZM2G393716		GRMZM2G393716_T01	Exon_3_195296683_195296724	8	SYNONYMOUS_CODING	taC/taT	taC/taT	257	2
4	137588866	C	T	SNP	Hom	GRMZM2G041842	GRMZM2G041842		GRMZM2G041842_T01	Exon_4_137588816_137589031	5	NON_SYNONYMOUS_CODING	Gca/Aca	Gca/Aca	668	1
4	152839986	C	T	SNP	Hom	GRMZM2G342691	GRMZM2G342691		GRMZM2G342691_T01	Exon_4_152839963_152840542	4	NON_SYNONYMOUS_CODING	gGg/gAg	gGg/gAg	319	1
4	188410445	G	A	SNP	Hom	GRMZM2G132956	GRMZM2G132956		GRMZM2G132956_T01	Exon_4_188409468_188412585	1	NON_SYNONYMOUS_CODING	cCg/cTg	cCg/cTg	640	1
4	194409402	T	C	SNP	Hom	AC190609.3_FG004	AC190609.3_FG004		AC190609.3_FGT004	Exon_4_194409209_194409433	4	NON_SYNONYMOUS_CODING	Agt/Ggt	Agt/Ggt	221	1
5	140895183	C	T	SNP	Hom	GRMZM2G000071	GRMZM2G000071		GRMZM2G000071_T01	Exon_5_140893993_140895248	2	NON_SYNONYMOUS_CODING	Cgg/Tgg	Cgg/Tgg	498	2
5	208164015	A	G	SNP	Hom	GRMZM2G055204	GRMZM2G055204		GRMZM2G055204_T01	Exon_5_208162767_208165308	1	SYNONYMOUS_CODING	tcA/tcG	tcA/tcG	43	4
5	208164153	G	A	SNP	Hom	GRMZM2G055204	GRMZM2G055204		GRMZM2G055204_T01	Exon_5_208162767_208165308	1	SYNONYMOUS_CODING	ccG/ccA	ccG/ccA	89	4
5	208164187	G	A	SNP	Hom	GRMZM2G055204	GRMZM2G055204		GRMZM2G055204_T01	Exon_5_208162767_208165308	1	NON_SYNONYMOUS_CODING	Gcc/Acc	Gcc/Acc	101	1
5	208172788	G	A	SNP	Hom	GRMZM2G055150	GRMZM2G055150		GRMZM2G055150_T01	Exon_5_208172768_208172908	2	SYNONYMOUS_CODING	ctG/ctA	ctG/ctA	86	4
5	208172827	G	A	SNP	Hom	GRMZM2G055150	GRMZM2G055150		GRMZM2G055150_T01	Exon_5_208172768_208172908	2	SYNONYMOUS_CODING	aaG/aaA	aaG/aaA	99	2
5	208172869	C	T	SNP	Hom	GRMZM2G055150	GRMZM2G055150		GRMZM2G055150_T01	Exon_5_208172768_208172908	2	SYNONYMOUS_CODING	ccC/ccT	ccC/ccT	113	4
5	208305002	C	T	SNP	Hom	GRMZM2G071180	GRMZM2G071180		GRMZM2G071180_T02	Exon_5_208304918_208305183	2	NON_SYNONYMOUS_CODING	Ctc/Ttc	Ctc/Ttc	68	1
5	208305043	C	A	SNP	Hom	GRMZM2G071180	GRMZM2G071180		GRMZM2G071180_T02	Exon_5_208304918_208305183	2	SYNONYMOUS_CODING	ggC/ggA	ggC/ggA	81	4
5	208305053	A	G	SNP	Hom	GRMZM2G071180	GRMZM2G071180		GRMZM2G071180_T02	Exon_5_208304918_208305183	2	NON_SYNONYMOUS_CODING	Act/Gct	Act/Gct	85	1
5	208305132	T	C	SNP	Hom	GRMZM2G071180	GRMZM2G071180		GRMZM2G071180_T02	Exon_5_208304918_208305183	2	NON_SYNONYMOUS_CODING	tTc/tCc	tTc/tCc	111	1
5	208305153	C	T	SNP	Hom	GRMZM2G071180	GRMZM2G071180		GRMZM2G071180_T02	Exon_5_208304918_208305183	2	NON_SYNONYMOUS_CODING	gCc/gTc	gCc/gTc	118	1
5	208306023	A	C	SNP	Hom	GRMZM2G071180	GRMZM2G071180		GRMZM2G071180_T02	Exon_5_208305582_208306241	4	NON_SYNONYMOUS_CODING	Atg/Ctg	Atg/Ctg	327	1
5	208306023	A	C	SNP	Hom	GRMZM2G071180	GRMZM2G071180		GRMZM2G071180_T01	Exon_5_208305582_208306241	3	NON_SYNONYMOUS_CODING	Atg/Ctg	Atg/Ctg	184	1
5	208306029	A	G	SNP	Hom	GRMZM2G071180	GRMZM2G071180		GRMZM2G071180_T02	Exon_5_208305582_208306241	4	NON_SYNONYMOUS_CODING	Atg/Gtg	Atg/Gtg	329	1
5	208306029	A	G	SNP	Hom	GRMZM2G071180	GRMZM2G071180		GRMZM2G071180_T01	Exon_5_208305582_208306241	3	NON_SYNONYMOUS_CODING	Atg/Gtg	Atg/Gtg	186	1
5	208306049	G	A	SNP	Hom	GRMZM2G071180	GRMZM2G071180		GRMZM2G071180_T02	Exon_5_208305582_208306241	4	SYNONYMOUS_CODING	gcG/gcA	gcG/gcA	335	4
5	208306049	G	A	SNP	Hom	GRMZM2G071180	GRMZM2G071180		GRMZM2G071180_T01	Exon_5_208305582_208306241	3	SYNONYMOUS_CODING	gcG/gcA	gcG/gcA	192	4
5	208306208	T	C	SNP	Hom	GRMZM2G071180	GRMZM2G071180		GRMZM2G071180_T02	Exon_5_208305582_208306241	4	SYNONYMOUS_CODING	ctT/ctC	ctT/ctC	388	4
5	208306208	T	C	SNP	Hom	GRMZM2G071180	GRMZM2G071180		GRMZM2G071180_T01	Exon_5_208305582_208306241	3	SYNONYMOUS_CODING	ctT/ctC	ctT/ctC	245	4
5	208343065	A	G	SNP	Hom	GRMZM2G159554	GRMZM2G159554		GRMZM2G159554_T01	Exon_5_208343054_208343539	2	NON_SYNONYMOUS_CODING	atA/atG	atA/atG	118	3
5	208349707	G	C	SNP	Hom	GRMZM2G159547	GRMZM2G159547		GRMZM2G159547_T01	Exon_5_208349356_208350289	3	SYNONYMOUS_CODING	ctC/ctG	ctC/ctG	282	4
5	208349734	C	A	SNP	Hom	GRMZM2G159547	GRMZM2G159547		GRMZM2G159547_T01	Exon_5_208349356_208350289	3	SYNONYMOUS_CODING	ctG/ctT	ctG/ctT	273	4
5	208349738	A	G	SNP	Hom	GRMZM2G159547	GRMZM2G159547		GRMZM2G159547_T01	Exon_5_208349356_208350289	3	NON_SYNONYMOUS_CODING	aTg/aCg	aTg/aCg	272	1
5	208350076	G	A	SNP	Hom	GRMZM2G159547	GRMZM2G159547		GRMZM2G159547_T01	Exon_5_208349356_208350289	3	SYNONYMOUS_CODING	gcC/gcT	gcC/gcT	159	4
5	208350205	G	C	SNP	Hom	GRMZM2G159547	GRMZM2G159547		GRMZM2G159547_T01	Exon_5_208349356_208350289	3	SYNONYMOUS_CODING	ctC/ctG	ctC/ctG	116	4
5	208367922	G	C	SNP	Hom	GRMZM2G159542	GRMZM2G159542		GRMZM2G159542_T01	Exon_5_208367671_208368034	1	NON_SYNONYMOUS_CODING	Gca/Cca	Gca/Cca	54	1
5	208367922	G	C	SNP	Hom	GRMZM2G159542	GRMZM2G159542		GRMZM2G159542_T02	Exon_5_208367671_208368034	1	NON_SYNONYMOUS_CODING	Gca/Cca	Gca/Cca	54	1
5	208367925	C	G	SNP	Hom	GRMZM2G159542	GRMZM2G159542		GRMZM2G159542_T01	Exon_5_208367671_208368034	1	NON_SYNONYMOUS_CODING	Ccc/Gcc	Ccc/Gcc	55	1
5	208367925	C	G	SNP	Hom	GRMZM2G159542	GRMZM2G159542		GRMZM2G159542_T02	Exon_5_208367671_208368034	1	NON_SYNONYMOUS_CODING	Ccc/Gcc	Ccc/Gcc	55	1
5	208367978	G	C	SNP	Hom	GRMZM2G159542	GRMZM2G159542		GRMZM2G159542_T01	Exon_5_208367671_208368034	1	SYNONYMOUS_CODING	ccG/ccC	ccG/ccC	72	4
5	208367978	G	C	SNP	Hom	GRMZM2G159542	GRMZM2G159542		GRMZM2G159542_T02	Exon_5_208367671_208368034	1	SYNONYMOUS_CODING	ccG/ccC	ccG/ccC	72	4
5	208367981	T	G	SNP	Hom	GRMZM2G159542	GRMZM2G159542		GRMZM2G159542_T01	Exon_5_208367671_208368034	1	SYNONYMOUS_CODING	ccT/ccG	ccT/ccG	73	4
5	208367981	T	G	SNP	Hom	GRMZM2G159542	GRMZM2G159542		GRMZM2G159542_T02	Exon_5_208367671_208368034	1	SYNONYMOUS_CODING	ccT/ccG	ccT/ccG	73	4
5	208368846	A	G	SNP	Hom	GRMZM2G159542	GRMZM2G159542		GRMZM2G159542_T01	Exon_5_208368737_208368861	3	NON_SYNONYMOUS_CODING	Att/Gtt	Att/Gtt	179	1
5	208368846	A	G	SNP	Hom	GRMZM2G159542	GRMZM2G159542		GRMZM2G159542_T02	Exon_5_208368737_208368861	3	NON_SYNONYMOUS_CODING	Att/Gtt	Att/Gtt	179	1
5	208370996	G	A	SNP	Hom	GRMZM2G159542	GRMZM2G159542		GRMZM2G159542_T01	Exon_5_208370819_208371001	5	NON_SYNONYMOUS_CODING	cGt/cAt	cGt/cAt	285	1
5	208370996	G	A	SNP	Hom	GRMZM2G159542	GRMZM2G159542		GRMZM2G159542_T02	Exon_5_208370819_208371001	5	NON_SYNONYMOUS_CODING	cGt/cAt	cGt/cAt	285	1
5	208371160	T	C	SNP	Hom	GRMZM2G159542	GRMZM2G159542		GRMZM2G159542_T01	Exon_5_208371093_208371237	6	SYNONYMOUS_CODING	ttT/ttC	ttT/ttC	309	2
5	208371160	T	C	SNP	Hom	GRMZM2G159542	GRMZM2G159542		GRMZM2G159542_T02	Exon_5_208371093_208371237	6	SYNONYMOUS_CODING	ttT/ttC	ttT/ttC	309	2
5	208374081	A	C	SNP	Hom	GRMZM2G159542	GRMZM2G159542		GRMZM2G159542_T01	Exon_5_208373956_208374090	8	SYNONYMOUS_CODING	ggA/ggC	ggA/ggC	433	4
5	208374081	A	C	SNP	Hom	GRMZM2G159542	GRMZM2G159542		GRMZM2G159542_T02	Exon_5_208373956_208374090	8	SYNONYMOUS_CODING	ggA/ggC	ggA/ggC	433	4
5	208374392	A	G	SNP	Hom	GRMZM2G159542	GRMZM2G159542		GRMZM2G159542_T01	Exon_5_208374198_208374401	9	SYNONYMOUS_CODING	ctA/ctG	ctA/ctG	501	4
5	208374392	A	G	SNP	Hom	GRMZM2G159542	GRMZM2G159542		GRMZM2G159542_T02	Exon_5_208374198_208374401	9	SYNONYMOUS_CODING	ctA/ctG	ctA/ctG	501	4
5	208375303	T	A	SNP	Hom	GRMZM2G159542	GRMZM2G159542		GRMZM2G159542_T02	Exon_5_208375187_208375493	11	NON_SYNONYMOUS_CODING	cTa/cAa	cTa/cAa	586	1
5	208380027	C	T	SNP	Hom	GRMZM2G159535	GRMZM2G159535		GRMZM2G159535_T01	Exon_5_208379364_208380337	4	SYNONYMOUS_CODING	caG/caA	caG/caA	270	2
5	208380263	G	T	SNP	Hom	GRMZM2G159535	GRMZM2G159535		GRMZM2G159535_T01	Exon_5_208379364_208380337	4	NON_SYNONYMOUS_CODING	Caa/Aaa	Caa/Aaa	192	1
5	208380264	C	A	SNP	Hom	GRMZM2G159535	GRMZM2G159535		GRMZM2G159535_T01	Exon_5_208379364_208380337	4	SYNONYMOUS_CODING	cgG/cgT	cgG/cgT	191	4
5	208380815	T	G	SNP	Hom	GRMZM2G159535	GRMZM2G159535		GRMZM2G159535_T01	Exon_5_208380778_208380965	2	SYNONYMOUS_CODING	Aga/Cga	Aga/Cga	113	2
5	208381709	C	T	SNP	Hom	GRMZM2G159535	GRMZM2G159535		GRMZM2G159535_T01	Exon_5_208381704_208382052	1	NON_SYNONYMOUS_CODING	Gtg/Atg	Gtg/Atg	61	1
5	208394285	G	A	SNP	Hom	GRMZM2G140893	GRMZM2G140893		GRMZM2G140893_T01	Exon_5_208394175_208394338	5	NON_SYNONYMOUS_CODING	cCa/cTa	cCa/cTa	424	1
5	208394285	G	A	SNP	Hom	GRMZM2G140893	GRMZM2G140893		GRMZM2G140893_T02	Exon_5_208394175_208394338	5	NON_SYNONYMOUS_CODING	cCa/cTa	cCa/cTa	424	1
5	208395134	C	T	SNP	Hom	GRMZM2G140893	GRMZM2G140893		GRMZM2G140893_T01	Exon_5_208394941_208395181	3	SYNONYMOUS_CODING	gcG/gcA	gcG/gcA	267	4
5	208395134	C	T	SNP	Hom	GRMZM2G140893	GRMZM2G140893		GRMZM2G140893_T02	Exon_5_208394941_208395181	3	SYNONYMOUS_CODING	gcG/gcA	gcG/gcA	267	4
5	208396258	G	A	SNP	Hom	GRMZM2G140893	GRMZM2G140893		GRMZM2G140893_T01	Exon_5_208396210_208396339	2	SYNONYMOUS_CODING	atC/atT	atC/atT	235	3
5	208396258	G	A	SNP	Hom	GRMZM2G140893	GRMZM2G140893		GRMZM2G140893_T02	Exon_5_208396210_208396339	2	SYNONYMOUS_CODING	atC/atT	atC/atT	235	3
5	208397028	A	C	SNP	Hom	GRMZM2G140893	GRMZM2G140893		GRMZM2G140893_T01	Exon_5_208396431_208397053	1	NON_SYNONYMOUS_CODING	gTg/gGg	gTg/gGg	9	1
5	208397028	A	C	SNP	Hom	GRMZM2G140893	GRMZM2G140893		GRMZM2G140893_T02	Exon_5_208396431_208397053	1	NON_SYNONYMOUS_CODING	gTg/gGg	gTg/gGg	9	1
5	208427007	C	A	SNP	Hom	GRMZM2G059958	GRMZM2G059958		GRMZM2G059958_T01	Exon_5_208426880_208429748	1	NON_SYNONYMOUS_CODING	Ctt/Att	Ctt/Att	13	1
5	208427645	C	T	SNP	Hom	GRMZM2G059958	GRMZM2G059958		GRMZM2G059958_T01	Exon_5_208426880_208429748	1	SYNONYMOUS_CODING	caC/caT	caC/caT	225	2
5	208427729	T	C	SNP	Hom	GRMZM2G059958	GRMZM2G059958		GRMZM2G059958_T01	Exon_5_208426880_208429748	1	SYNONYMOUS_CODING	ctT/ctC	ctT/ctC	253	4
5	208428317	C	T	SNP	Hom	GRMZM2G059958	GRMZM2G059958		GRMZM2G059958_T01	Exon_5_208426880_208429748	1	SYNONYMOUS_CODING	gaC/gaT	gaC/gaT	449	2
5	208428416	C	T	SNP	Hom	GRMZM2G059958	GRMZM2G059958		GRMZM2G059958_T01	Exon_5_208426880_208429748	1	SYNONYMOUS_CODING	taC/taT	taC/taT	482	2
5	208428439	G	A	SNP	Hom	GRMZM2G059958	GRMZM2G059958		GRMZM2G059958_T01	Exon_5_208426880_208429748	1	NON_SYNONYMOUS_CODING	cGa/cAa	cGa/cAa	490	1
5	208428683	T	C	SNP	Hom	GRMZM2G059958	GRMZM2G059958		GRMZM2G059958_T01	Exon_5_208426880_208429748	1	SYNONYMOUS_CODING	gaT/gaC	gaT/gaC	571	2
5	208428764	G	C	SNP	Hom	GRMZM2G059958	GRMZM2G059958		GRMZM2G059958_T01	Exon_5_208426880_208429748	1	SYNONYMOUS_CODING	gcG/gcC	gcG/gcC	598	4
5	208428857	T	C	SNP	Hom	GRMZM2G059958	GRMZM2G059958		GRMZM2G059958_T01	Exon_5_208426880_208429748	1	SYNONYMOUS_CODING	ggT/ggC	ggT/ggC	629	4
5	208429010	A	G	SNP	Hom	GRMZM2G059958	GRMZM2G059958		GRMZM2G059958_T01	Exon_5_208426880_208429748	1	SYNONYMOUS_CODING	ggA/ggG	ggA/ggG	680	4
5	208429176	C	G	SNP	Hom	GRMZM2G059958	GRMZM2G059958		GRMZM2G059958_T01	Exon_5_208426880_208429748	1	NON_SYNONYMOUS_CODING	Cta/Gta	Cta/Gta	736	2
5	208429217	T	C	SNP	Hom	GRMZM2G059958	GRMZM2G059958		GRMZM2G059958_T01	Exon_5_208426880_208429748	1	SYNONYMOUS_CODING	gaT/gaC	gaT/gaC	749	2
5	208429258	C	T	SNP	Hom	GRMZM2G059958	GRMZM2G059958		GRMZM2G059958_T01	Exon_5_208426880_208429748	1	NON_SYNONYMOUS_CODING	gCt/gTt	gCt/gTt	763	1
8	12195474	C	T	SNP	Hom	GRMZM2G081892	GRMZM2G081892		GRMZM2G081892_T01	Exon_8_12194913_12196458	2	SYNONYMOUS_CODING	ccG/ccA	ccG/ccA	248	4
8	12195474	C	T	SNP	Hom	GRMZM2G081892	GRMZM2G081892		GRMZM2G081892_T02	Exon_8_12194941_12196923	1	SYNONYMOUS_CODING	ccG/ccA	ccG/ccA	248	4
8	20085319	T	C	SNP	Hom	GRMZM2G395749	GRMZM2G395749		GRMZM2G395749_T01	Exon_8_20085205_20085387	18	SYNONYMOUS_CODING	agA/agG	agA/agG	990	2
9	76685936	A	G	SNP	Hom	GRMZM5G874366	GRMZM5G874366		GRMZM5G874366_T01	Exon_9_76685932_76685937	1	START_LOST	aTg/aCg	aTg/aCg	1	1
10	142398696	T	A	SNP	Hom	GRMZM2G354867	GRMZM2G354867		GRMZM2G354867_T01	Exon_10_142398689_142398775	2	NON_SYNONYMOUS_CODING	gaT/gaA	gaT/gaA	144	2
10	142398698	C	G	SNP	Hom	GRMZM2G354867	GRMZM2G354867		GRMZM2G354867_T01	Exon_10_142398689_142398775	2	NON_SYNONYMOUS_CODING	gCa/gGa	gCa/gGa	145	1
10	142398750	C	T	SNP	Hom	GRMZM2G354867	GRMZM2G354867		GRMZM2G354867_T01	Exon_10_142398689_142398775	2	SYNONYMOUS_CODING	agC/agT	agC/agT	162	2
10	142400378	G	A	SNP	Hom	GRMZM2G354867	GRMZM2G354867		GRMZM2G354867_T01	Exon_10_142400352_142401504	3	NON_SYNONYMOUS_CODING	Gga/Aga	Gga/Aga	180	1
10	142400452	C	T	SNP	Hom	GRMZM2G354867	GRMZM2G354867		GRMZM2G354867_T01	Exon_10_142400352_142401504	3	SYNONYMOUS_CODING	gaC/gaT	gaC/gaT	204	2
10	142400488	C	T	SNP	Hom	GRMZM2G354867	GRMZM2G354867		GRMZM2G354867_T01	Exon_10_142400352_142401504	3	SYNONYMOUS_CODING	ctC/ctT	ctC/ctT	216	4
10	142400875	G	A	SNP	Hom	GRMZM2G354867	GRMZM2G354867		GRMZM2G354867_T01	Exon_10_142400352_142401504	3	SYNONYMOUS_CODING	aaG/aaA	aaG/aaA	345	2
10	142400962	A	C	SNP	Hom	GRMZM2G354867	GRMZM2G354867		GRMZM2G354867_T01	Exon_10_142400352_142401504	3	SYNONYMOUS_CODING	acA/acC	acA/acC	374	4
10	142400974	T	C	SNP	Hom	GRMZM2G354867	GRMZM2G354867		GRMZM2G354867_T01	Exon_10_142400352_142401504	3	SYNONYMOUS_CODING	acT/acC	acT/acC	378	4
10	142400977	A	G	SNP	Hom	GRMZM2G354867	GRMZM2G354867		GRMZM2G354867_T01	Exon_10_142400352_142401504	3	SYNONYMOUS_CODING	caA/caG	caA/caG	379	2
10	142401043	C	T	SNP	Hom	GRMZM2G354867	GRMZM2G354867		GRMZM2G354867_T01	Exon_10_142400352_142401504	3	SYNONYMOUS_CODING	gaC/gaT	gaC/gaT	401	2
10	142401193	C	G	SNP	Hom	GRMZM2G354867	GRMZM2G354867		GRMZM2G354867_T01	Exon_10_142400352_142401504	3	SYNONYMOUS_CODING	ccC/ccG	ccC/ccG	451	4
10	142401202	C	G	SNP	Hom	GRMZM2G354867	GRMZM2G354867		GRMZM2G354867_T01	Exon_10_142400352_142401504	3	SYNONYMOUS_CODING	gcC/gcG	gcC/gcG	454	4
10	142402005	G	A	SNP	Hom	GRMZM2G354867	GRMZM2G354867		GRMZM2G354867_T01	Exon_10_142401834_142403289	4	SYNONYMOUS_CODING	gaG/gaA	gaG/gaA	612	2
10	142402093	A	G	SNP	Hom	GRMZM2G354867	GRMZM2G354867		GRMZM2G354867_T01	Exon_10_142401834_142403289	4	NON_SYNONYMOUS_CODING	Att/Gtt	Att/Gtt	642	1
10	142402146	C	T	SNP	Hom	GRMZM2G354867	GRMZM2G354867		GRMZM2G354867_T01	Exon_10_142401834_142403289	4	SYNONYMOUS_CODING	aaC/aaT	aaC/aaT	659	2
10	142402167	T	A	SNP	Hom	GRMZM2G354867	GRMZM2G354867		GRMZM2G354867_T01	Exon_10_142401834_142403289	4	SYNONYMOUS_CODING	tcT/tcA	tcT/tcA	666	4
10	142402194	T	C	SNP	Hom	GRMZM2G354867	GRMZM2G354867		GRMZM2G354867_T01	Exon_10_142401834_142403289	4	SYNONYMOUS_CODING	caT/caC	caT/caC	675	2
10	142402329	T	G	SNP	Hom	GRMZM2G354867	GRMZM2G354867		GRMZM2G354867_T01	Exon_10_142401834_142403289	4	SYNONYMOUS_CODING	ctT/ctG	ctT/ctG	720	4
10	142402557	T	C	SNP	Hom	GRMZM2G354867	GRMZM2G354867		GRMZM2G354867_T01	Exon_10_142401834_142403289	4	SYNONYMOUS_CODING	gtT/gtC	gtT/gtC	796	4
10	142402767	G	C	SNP	Hom	GRMZM2G354867	GRMZM2G354867		GRMZM2G354867_T01	Exon_10_142401834_142403289	4	SYNONYMOUS_CODING	gcG/gcC	gcG/gcC	866	4
10	142403269	A	G	SNP	Hom	GRMZM2G354867	GRMZM2G354867		GRMZM2G354867_T01	Exon_10_142401834_142403289	4	NON_SYNONYMOUS_CODING	Aac/Gac	Aac/Gac	1034	1
10	142409393	T	C	SNP	Hom	GRMZM2G349988	GRMZM2G349988		GRMZM2G349988_T01	Exon_10_142409337_142409469	9	NON_SYNONYMOUS_CODING	aAc/aGc	aAc/aGc	329	1
10	142409755	T	C	SNP	Hom	GRMZM2G349988	GRMZM2G349988		GRMZM2G349988_T01	Exon_10_142409717_142409759	7	SYNONYMOUS_CODING	cgA/cgG	cgA/cgG	264	4
10	142409843	C	T	SNP	Hom	GRMZM2G349988	GRMZM2G349988		GRMZM2G349988_T01	Exon_10_142409832_142410080	6	NON_SYNONYMOUS_CODING	cGc/cAc	cGc/cAc	259	1
10	142409944	A	T	SNP	Hom	GRMZM2G349988	GRMZM2G349988		GRMZM2G349988_T01	Exon_10_142409832_142410080	6	SYNONYMOUS_CODING	acT/acA	acT/acA	225	4
10	142410189	T	C	SNP	Hom	GRMZM2G349988	GRMZM2G349988		GRMZM2G349988_T01	Exon_10_142410184_142410258	5	NON_SYNONYMOUS_CODING	gAc/gGc	gAc/gGc	178	1
10	142410206	A	C	SNP	Hom	GRMZM2G349988	GRMZM2G349988		GRMZM2G349988_T01	Exon_10_142410184_142410258	5	NON_SYNONYMOUS_CODING	atT/atG	atT/atG	172	3
10	142410575	C	T	SNP	Hom	GRMZM2G349988	GRMZM2G349988		GRMZM2G349988_T01	Exon_10_142410557_142410610	3	SYNONYMOUS_CODING	ttG/ttA	ttG/ttA	126	2
10	142432221	T	C	SNP	Hom	GRMZM2G126858	GRMZM2G126858		GRMZM2G126858_T02	Exon_10_142431765_142432436	22	SYNONYMOUS_CODING	gaA/gaG	gaA/gaG	911	2
10	142432404	C	G	SNP	Hom	GRMZM2G126858	GRMZM2G126858		GRMZM2G126858_T02	Exon_10_142431765_142432436	22	SYNONYMOUS_CODING	ctG/ctC	ctG/ctC	850	4
10	142434743	G	A	SNP	Hom	GRMZM2G126858	GRMZM2G126858		GRMZM2G126858_T01	Exon_10_142434624_142434837	16	NON_SYNONYMOUS_CODING	aCt/aTt	aCt/aTt	515	1
10	142434743	G	A	SNP	Hom	GRMZM2G126858	GRMZM2G126858		GRMZM2G126858_T02	Exon_10_142434624_142434837	16	NON_SYNONYMOUS_CODING	aCt/aTt	aCt/aTt	515	1
10	142435017	T	C	SNP	Hom	GRMZM2G126858	GRMZM2G126858		GRMZM2G126858_T01	Exon_10_142434942_142435321	15	SYNONYMOUS_CODING	caA/caG	caA/caG	458	2
10	142435017	T	C	SNP	Hom	GRMZM2G126858	GRMZM2G126858		GRMZM2G126858_T02	Exon_10_142434942_142435321	15	SYNONYMOUS_CODING	caA/caG	caA/caG	458	2
10	142435056	A	G	SNP	Hom	GRMZM2G126858	GRMZM2G126858		GRMZM2G126858_T01	Exon_10_142434942_142435321	15	SYNONYMOUS_CODING	ggT/ggC	ggT/ggC	445	4
10	142435056	A	G	SNP	Hom	GRMZM2G126858	GRMZM2G126858		GRMZM2G126858_T02	Exon_10_142434942_142435321	15	SYNONYMOUS_CODING	ggT/ggC	ggT/ggC	445	4
10	142436537	A	G	SNP	Hom	GRMZM2G126858	GRMZM2G126858		GRMZM2G126858_T01	Exon_10_142436486_142436560	11	NON_SYNONYMOUS_CODING	tTt/tCt	tTt/tCt	273	1
10	142436537	A	G	SNP	Hom	GRMZM2G126858	GRMZM2G126858		GRMZM2G126858_T02	Exon_10_142436486_142436560	11	NON_SYNONYMOUS_CODING	tTt/tCt	tTt/tCt	273	1
10	142466390	G	A	SNP	Hom	GRMZM2G126957	GRMZM2G126957		GRMZM2G126957_T02	Exon_10_142466253_142466400	4	SYNONYMOUS_CODING	tcG/tcA	tcG/tcA	67	4
10	142467111	T	C	SNP	Hom	GRMZM2G126957	GRMZM2G126957		GRMZM2G126957_T02	Exon_10_142467092_142467166	6	NON_SYNONYMOUS_CODING	gTt/gCt	gTt/gCt	115	1
10	142474297	T	C	SNP	Hom	GRMZM2G155837	GRMZM2G155837		GRMZM2G155837_T02	Exon_10_142474210_142474371	15	NON_SYNONYMOUS_CODING	Att/Gtt	Att/Gtt	169	1
10	142474297	T	C	SNP	Hom	GRMZM2G155837	GRMZM2G155837		GRMZM2G155837_T01	Exon_10_142474210_142474371	15	NON_SYNONYMOUS_CODING	Att/Gtt	Att/Gtt	169	1
10	142474728	A	G	SNP	Hom	GRMZM2G155837	GRMZM2G155837		GRMZM2G155837_T02	Exon_10_142474631_142474829	14	SYNONYMOUS_CODING	ttT/ttC	ttT/ttC	111	2
10	142474728	A	G	SNP	Hom	GRMZM2G155837	GRMZM2G155837		GRMZM2G155837_T01	Exon_10_142474631_142474829	14	SYNONYMOUS_CODING	ttT/ttC	ttT/ttC	111	2
10	142506039	C	T	SNP	Hom	GRMZM2G054537	GRMZM2G054537		GRMZM2G054537_T01	Exon_10_142505503_142506104	4	NON_SYNONYMOUS_CODING	Gta/Ata	Gta/Ata	197	1
10	142506493	T	C	SNP	Hom	GRMZM2G054537	GRMZM2G054537		GRMZM2G054537_T01	Exon_10_142506462_142506559	2	SYNONYMOUS_CODING	ttA/ttG	ttA/ttG	142	2
10	142506538	C	T	SNP	Hom	GRMZM2G054537	GRMZM2G054537		GRMZM2G054537_T01	Exon_10_142506462_142506559	2	SYNONYMOUS_CODING	aaG/aaA	aaG/aaA	127	2
10	142508717	C	T	SNP	Hom	GRMZM2G054537	GRMZM2G054537		GRMZM2G054537_T01	Exon_10_142508664_142509165	1	SYNONYMOUS_CODING	tcG/tcA	tcG/tcA	102	4
10	142508720	C	A	SNP	Hom	GRMZM2G054537	GRMZM2G054537		GRMZM2G054537_T01	Exon_10_142508664_142509165	1	SYNONYMOUS_CODING	ccG/ccT	ccG/ccT	101	4
10	142589652	A	G	SNP	Hom	GRMZM2G145480	GRMZM2G145480		GRMZM2G145480_T01	Exon_10_142589065_142590829	1	SYNONYMOUS_CODING	gtA/gtG	gtA/gtG	57	4
10	142589727	C	G	SNP	Hom	GRMZM2G145480	GRMZM2G145480		GRMZM2G145480_T01	Exon_10_142589065_142590829	1	SYNONYMOUS_CODING	gcC/gcG	gcC/gcG	82	4
10	142589967	T	C	SNP	Hom	GRMZM2G145480	GRMZM2G145480		GRMZM2G145480_T01	Exon_10_142589065_142590829	1	SYNONYMOUS_CODING	caT/caC	caT/caC	162	2
10	142590050	A	G	SNP	Hom	GRMZM2G145480	GRMZM2G145480		GRMZM2G145480_T01	Exon_10_142589065_142590829	1	NON_SYNONYMOUS_CODING	tAc/tGc	tAc/tGc	190	1
10	142590135	C	T	SNP	Hom	GRMZM2G145480	GRMZM2G145480		GRMZM2G145480_T01	Exon_10_142589065_142590829	1	SYNONYMOUS_CODING	ttC/ttT	ttC/ttT	218	2
10	142590147	C	T	SNP	Hom	GRMZM2G145480	GRMZM2G145480		GRMZM2G145480_T01	Exon_10_142589065_142590829	1	SYNONYMOUS_CODING	ctC/ctT	ctC/ctT	222	4
10	142590162	G	A	SNP	Hom	GRMZM2G145480	GRMZM2G145480		GRMZM2G145480_T01	Exon_10_142589065_142590829	1	SYNONYMOUS_CODING	caG/caA	caG/caA	227	2
10	142595312	A	G	SNP	Hom	GRMZM2G145460	GRMZM2G145460		GRMZM2G145460_T01	Exon_10_142595291_142595432	7	SYNONYMOUS_CODING	tcA/tcG	tcA/tcG	174	4
10	142596037	T	C	SNP	Hom	GRMZM2G145460	GRMZM2G145460		GRMZM2G145460_T01	Exon_10_142595945_142596089	10	SYNONYMOUS_CODING	ctT/ctC	ctT/ctC	323	4
10	142596429	A	G	SNP	Hom	GRMZM2G145460	GRMZM2G145460		GRMZM2G145460_T01	Exon_10_142596212_142596824	11	SYNONYMOUS_CODING	gcA/gcG	gcA/gcG	413	4
10	142597845	T	C	SNP	Hom	GRMZM2G145175	GRMZM2G145175		GRMZM2G145175_T01	Exon_10_142597570_142597876	9	NON_SYNONYMOUS_CODING	gAt/gGt	gAt/gGt	210	1
10	142597845	T	C	SNP	Hom	GRMZM2G145175	GRMZM2G145175		GRMZM2G145175_T02	Exon_10_142597427_142597876	9	NON_SYNONYMOUS_CODING	gAt/gGt	gAt/gGt	274	1
10	142597845	T	C	SNP	Hom	GRMZM2G145175	GRMZM2G145175		GRMZM2G145175_T04	Exon_10_142597427_142597876	8	NON_SYNONYMOUS_CODING	gAt/gGt	gAt/gGt	199	1
10	142598476	C	A	SNP	Hom	GRMZM2G145175	GRMZM2G145175		GRMZM2G145175_T01	Exon_10_142598440_142598569	8	NON_SYNONYMOUS_CODING	atG/atT	atG/atT	187	1
10	142598476	C	A	SNP	Hom	GRMZM2G145175	GRMZM2G145175		GRMZM2G145175_T02	Exon_10_142598440_142598569	8	NON_SYNONYMOUS_CODING	atG/atT	atG/atT	251	1
10	142598476	C	A	SNP	Hom	GRMZM2G145175	GRMZM2G145175		GRMZM2G145175_T03	Exon_10_142598440_142598580	7	NON_SYNONYMOUS_CODING	tGg/tTg	tGg/tTg	180	1
10	142598476	C	A	SNP	Hom	GRMZM2G145175	GRMZM2G145175		GRMZM2G145175_T05	Exon_10_142598440_142598580	8	NON_SYNONYMOUS_CODING	tGg/tTg	tGg/tTg	255	1
10	142598476	C	A	SNP	Hom	GRMZM2G145175	GRMZM2G145175		GRMZM2G145175_T04	Exon_10_142598440_142598569	7	NON_SYNONYMOUS_CODING	atG/atT	atG/atT	176	1
10	142610415	G	A	SNP	Hom	GRMZM2G445617	GRMZM2G445617		GRMZM2G445617_T02	Exon_10_142610332_142610473	5	SYNONYMOUS_CODING	gtC/gtT	gtC/gtT	466	4
10	142610415	G	A	SNP	Hom	GRMZM2G445617	GRMZM2G445617		GRMZM2G445617_T01	Exon_10_142610332_142610473	5	SYNONYMOUS_CODING	gtC/gtT	gtC/gtT	466	4
10	142612510	A	G	SNP	Hom	GRMZM2G445617	GRMZM2G445617		GRMZM2G445617_T02	Exon_10_142612474_142612788	2	SYNONYMOUS_CODING	ccT/ccC	ccT/ccC	138	4
10	142612510	A	G	SNP	Hom	GRMZM2G445617	GRMZM2G445617		GRMZM2G445617_T01	Exon_10_142612474_142612788	2	SYNONYMOUS_CODING	ccT/ccC	ccT/ccC	138	4
10	142921276	G	C	SNP	Hom	GRMZM2G121612	GRMZM2G121612		GRMZM2G121612_T02	Exon_10_142921158_142922606	3	NON_SYNONYMOUS_CODING	agG/agC	agG/agC	93	2
10	142921276	G	C	SNP	Hom	GRMZM2G121612	GRMZM2G121612		GRMZM2G121612_T01	Exon_10_142921158_142922606	3	NON_SYNONYMOUS_CODING	agG/agC	agG/agC	93	2
10	142921280	A	G	SNP	Hom	GRMZM2G121612	GRMZM2G121612		GRMZM2G121612_T02	Exon_10_142921158_142922606	3	NON_SYNONYMOUS_CODING	Aat/Gat	Aat/Gat	95	1
10	142921280	A	G	SNP	Hom	GRMZM2G121612	GRMZM2G121612		GRMZM2G121612_T01	Exon_10_142921158_142922606	3	NON_SYNONYMOUS_CODING	Aat/Gat	Aat/Gat	95	1
10	142921312	A	T	SNP	Hom	GRMZM2G121612	GRMZM2G121612		GRMZM2G121612_T02	Exon_10_142921158_142922606	3	SYNONYMOUS_CODING	tcA/tcT	tcA/tcT	105	4
10	142921312	A	T	SNP	Hom	GRMZM2G121612	GRMZM2G121612		GRMZM2G121612_T01	Exon_10_142921158_142922606	3	SYNONYMOUS_CODING	tcA/tcT	tcA/tcT	105	4
10	142921345	T	C	SNP	Hom	GRMZM2G121612	GRMZM2G121612		GRMZM2G121612_T02	Exon_10_142921158_142922606	3	SYNONYMOUS_CODING	acT/acC	acT/acC	116	4
10	142921345	T	C	SNP	Hom	GRMZM2G121612	GRMZM2G121612		GRMZM2G121612_T01	Exon_10_142921158_142922606	3	SYNONYMOUS_CODING	acT/acC	acT/acC	116	4
10	142921364	G	T	SNP	Hom	GRMZM2G121612	GRMZM2G121612		GRMZM2G121612_T02	Exon_10_142921158_142922606	3	NON_SYNONYMOUS_CODING	Gtt/Ttt	Gtt/Ttt	123	1
10	142921364	G	T	SNP	Hom	GRMZM2G121612	GRMZM2G121612		GRMZM2G121612_T01	Exon_10_142921158_142922606	3	NON_SYNONYMOUS_CODING	Gtt/Ttt	Gtt/Ttt	123	1
10	142921390	T	C	SNP	Hom	GRMZM2G121612	GRMZM2G121612		GRMZM2G121612_T02	Exon_10_142921158_142922606	3	SYNONYMOUS_CODING	agT/agC	agT/agC	131	2
10	142921390	T	C	SNP	Hom	GRMZM2G121612	GRMZM2G121612		GRMZM2G121612_T01	Exon_10_142921158_142922606	3	SYNONYMOUS_CODING	agT/agC	agT/agC	131	2
10	142921522	T	A	SNP	Hom	GRMZM2G121612	GRMZM2G121612		GRMZM2G121612_T02	Exon_10_142921158_142922606	3	SYNONYMOUS_CODING	gcT/gcA	gcT/gcA	175	4
10	142921522	T	A	SNP	Hom	GRMZM2G121612	GRMZM2G121612		GRMZM2G121612_T01	Exon_10_142921158_142922606	3	SYNONYMOUS_CODING	gcT/gcA	gcT/gcA	175	4
10	142921561	T	C	SNP	Hom	GRMZM2G121612	GRMZM2G121612		GRMZM2G121612_T02	Exon_10_142921158_142922606	3	SYNONYMOUS_CODING	agT/agC	agT/agC	188	2
10	142921561	T	C	SNP	Hom	GRMZM2G121612	GRMZM2G121612		GRMZM2G121612_T01	Exon_10_142921158_142922606	3	SYNONYMOUS_CODING	agT/agC	agT/agC	188	2
10	142921592	T	G	SNP	Hom	GRMZM2G121612	GRMZM2G121612		GRMZM2G121612_T02	Exon_10_142921158_142922606	3	NON_SYNONYMOUS_CODING	Ttt/Gtt	Ttt/Gtt	199	1
10	142921592	T	G	SNP	Hom	GRMZM2G121612	GRMZM2G121612		GRMZM2G121612_T01	Exon_10_142921158_142922606	3	NON_SYNONYMOUS_CODING	Ttt/Gtt	Ttt/Gtt	199	1
10	142921659	C	T	SNP	Hom	GRMZM2G121612	GRMZM2G121612		GRMZM2G121612_T02	Exon_10_142921158_142922606	3	NON_SYNONYMOUS_CODING	aCa/aTa	aCa/aTa	221	1
10	142921659	C	T	SNP	Hom	GRMZM2G121612	GRMZM2G121612		GRMZM2G121612_T01	Exon_10_142921158_142922606	3	NON_SYNONYMOUS_CODING	aCa/aTa	aCa/aTa	221	1
10	142921749	G	A	SNP	Hom	GRMZM2G121612	GRMZM2G121612		GRMZM2G121612_T02	Exon_10_142921158_142922606	3	NON_SYNONYMOUS_CODING	gGg/gAg	gGg/gAg	251	1
10	142921749	G	A	SNP	Hom	GRMZM2G121612	GRMZM2G121612		GRMZM2G121612_T01	Exon_10_142921158_142922606	3	NON_SYNONYMOUS_CODING	gGg/gAg	gGg/gAg	251	1
10	142921774	T	G	SNP	Hom	GRMZM2G121612	GRMZM2G121612		GRMZM2G121612_T02	Exon_10_142921158_142922606	3	NON_SYNONYMOUS_CODING	gaT/gaG	gaT/gaG	259	2
10	142921774	T	G	SNP	Hom	GRMZM2G121612	GRMZM2G121612		GRMZM2G121612_T01	Exon_10_142921158_142922606	3	NON_SYNONYMOUS_CODING	gaT/gaG	gaT/gaG	259	2
10	142921798	T	G	SNP	Hom	GRMZM2G121612	GRMZM2G121612		GRMZM2G121612_T02	Exon_10_142921158_142922606	3	NON_SYNONYMOUS_CODING	gaT/gaG	gaT/gaG	267	2
10	142921798	T	G	SNP	Hom	GRMZM2G121612	GRMZM2G121612		GRMZM2G121612_T01	Exon_10_142921158_142922606	3	NON_SYNONYMOUS_CODING	gaT/gaG	gaT/gaG	267	2
10	142921842	G	T	SNP	Hom	GRMZM2G121612	GRMZM2G121612		GRMZM2G121612_T02	Exon_10_142921158_142922606	3	NON_SYNONYMOUS_CODING	aGg/aTg	aGg/aTg	282	1
10	142921842	G	T	SNP	Hom	GRMZM2G121612	GRMZM2G121612		GRMZM2G121612_T01	Exon_10_142921158_142922606	3	NON_SYNONYMOUS_CODING	aGg/aTg	aGg/aTg	282	1
10	142921861	T	C	SNP	Hom	GRMZM2G121612	GRMZM2G121612		GRMZM2G121612_T02	Exon_10_142921158_142922606	3	SYNONYMOUS_CODING	gcT/gcC	gcT/gcC	288	4
10	142921861	T	C	SNP	Hom	GRMZM2G121612	GRMZM2G121612		GRMZM2G121612_T01	Exon_10_142921158_142922606	3	SYNONYMOUS_CODING	gcT/gcC	gcT/gcC	288	4
10	142921887	A	C	SNP	Hom	GRMZM2G121612	GRMZM2G121612		GRMZM2G121612_T02	Exon_10_142921158_142922606	3	NON_SYNONYMOUS_CODING	aAc/aCc	aAc/aCc	297	1
10	142921887	A	C	SNP	Hom	GRMZM2G121612	GRMZM2G121612		GRMZM2G121612_T01	Exon_10_142921158_142922606	3	NON_SYNONYMOUS_CODING	aAc/aCc	aAc/aCc	297	1
10	142921912	G	A	SNP	Hom	GRMZM2G121612	GRMZM2G121612		GRMZM2G121612_T02	Exon_10_142921158_142922606	3	SYNONYMOUS_CODING	gtG/gtA	gtG/gtA	305	4
10	142921912	G	A	SNP	Hom	GRMZM2G121612	GRMZM2G121612		GRMZM2G121612_T01	Exon_10_142921158_142922606	3	SYNONYMOUS_CODING	gtG/gtA	gtG/gtA	305	4
10	142922040	G	A	SNP	Hom	GRMZM2G121612	GRMZM2G121612		GRMZM2G121612_T02	Exon_10_142921158_142922606	3	NON_SYNONYMOUS_CODING	aGa/aAa	aGa/aAa	348	1
10	142922040	G	A	SNP	Hom	GRMZM2G121612	GRMZM2G121612		GRMZM2G121612_T01	Exon_10_142921158_142922606	3	NON_SYNONYMOUS_CODING	aGa/aAa	aGa/aAa	348	1
10	142922164	C	T	SNP	Hom	GRMZM2G121612	GRMZM2G121612		GRMZM2G121612_T02	Exon_10_142921158_142922606	3	SYNONYMOUS_CODING	ttC/ttT	ttC/ttT	389	2
10	142922164	C	T	SNP	Hom	GRMZM2G121612	GRMZM2G121612		GRMZM2G121612_T01	Exon_10_142921158_142922606	3	SYNONYMOUS_CODING	ttC/ttT	ttC/ttT	389	2
10	142922222	A	G	SNP	Hom	GRMZM2G121612	GRMZM2G121612		GRMZM2G121612_T02	Exon_10_142921158_142922606	3	NON_SYNONYMOUS_CODING	Aag/Gag	Aag/Gag	409	1
10	142922222	A	G	SNP	Hom	GRMZM2G121612	GRMZM2G121612		GRMZM2G121612_T01	Exon_10_142921158_142922606	3	NON_SYNONYMOUS_CODING	Aag/Gag	Aag/Gag	409	1
10	142922483	T	C	SNP	Hom	GRMZM2G121612	GRMZM2G121612		GRMZM2G121612_T02	Exon_10_142921158_142922606	3	NON_SYNONYMOUS_CODING	Tca/Cca	Tca/Cca	496	1
10	142922483	T	C	SNP	Hom	GRMZM2G121612	GRMZM2G121612		GRMZM2G121612_T01	Exon_10_142921158_142922606	3	NON_SYNONYMOUS_CODING	Tca/Cca	Tca/Cca	496	1
10	142928414	G	A	SNP	Hom	GRMZM2G121612	GRMZM2G121612		GRMZM2G121612_T02	Exon_10_142928235_142928417	12	SYNONYMOUS_CODING	ggG/ggA	ggG/ggA	1024	4
10	142928414	G	A	SNP	Hom	GRMZM2G121612	GRMZM2G121612		GRMZM2G121612_T01	Exon_10_142928235_142928417	12	SYNONYMOUS_CODING	ggG/ggA	ggG/ggA	1024	4
10	142928790	A	G	SNP	Hom	GRMZM2G121612	GRMZM2G121612		GRMZM2G121612_T01	Exon_10_142928731_142928842	14	SYNONYMOUS_CODING	acA/acG	acA/acG	1089	4
10	142929173	C	G	SNP	Hom	GRMZM2G121612	GRMZM2G121612		GRMZM2G121612_T02	Exon_10_142929143_142929377	16	NON_SYNONYMOUS_CODING	gaC/gaG	gaC/gaG	1137	2
10	142929173	C	G	SNP	Hom	GRMZM2G121612	GRMZM2G121612		GRMZM2G121612_T01	Exon_10_142929143_142929525	16	NON_SYNONYMOUS_CODING	gaC/gaG	gaC/gaG	1158	2
10	142957628	C	G	SNP	Hom	GRMZM2G121605	GRMZM2G121605		GRMZM2G121605_T01	Exon_10_142957097_142958170	3	NON_SYNONYMOUS_CODING	gaG/gaC	gaG/gaC	519	2
10	142958742	A	G	SNP	Hom	GRMZM2G121605	GRMZM2G121605		GRMZM2G121605_T01	Exon_10_142958662_142959564	1	SYNONYMOUS_CODING	tgT/tgC	tgT/tgC	223	2
10	142958775	A	G	SNP	Hom	GRMZM2G121605	GRMZM2G121605		GRMZM2G121605_T01	Exon_10_142958662_142959564	1	SYNONYMOUS_CODING	ttT/ttC	ttT/ttC	212	2
10	142958799	A	C	SNP	Hom	GRMZM2G121605	GRMZM2G121605		GRMZM2G121605_T01	Exon_10_142958662_142959564	1	SYNONYMOUS_CODING	ctT/ctG	ctT/ctG	204	4
10	143059012	G	A	SNP	Hom	GRMZM2G396856	GRMZM2G396856		GRMZM2G396856_T03	Exon_10_143058165_143059179	1	NON_SYNONYMOUS_CODING	aGt/aAt	aGt/aAt	41	1
10	143059021	G	T	SNP	Hom	GRMZM2G396856	GRMZM2G396856		GRMZM2G396856_T03	Exon_10_143058165_143059179	1	NON_SYNONYMOUS_CODING	gGa/gTa	gGa/gTa	44	1
10	143063063	C	T	SNP	Hom	GRMZM2G396856	GRMZM2G396856		GRMZM2G396856_T01	Exon_10_143062773_143063415	11	SYNONYMOUS_CODING	tcC/tcT	tcC/tcT	474	4
10	143063063	C	T	SNP	Hom	GRMZM2G396856	GRMZM2G396856		GRMZM2G396856_T02	Exon_10_143062773_143063379	11	SYNONYMOUS_CODING	tcC/tcT	tcC/tcT	474	4
10	143067192	T	A	SNP	Hom	GRMZM2G396846	GRMZM2G396846		GRMZM2G396846_T01	Exon_10_143066059_143067290	1	NON_SYNONYMOUS_CODING	Ttg/Atg	Ttg/Atg	338	2
10	143067258	G	C	SNP	Hom	GRMZM2G396846	GRMZM2G396846		GRMZM2G396846_T01	Exon_10_143066059_143067290	1	NON_SYNONYMOUS_CODING	Gat/Cat	Gat/Cat	360	1
10	143067277	G	A	SNP	Hom	GRMZM2G396846	GRMZM2G396846		GRMZM2G396846_T01	Exon_10_143066059_143067290	1	NON_SYNONYMOUS_CODING	gGc/gAc	gGc/gAc	366	1
10	143067452	G	T	SNP	Hom	GRMZM2G396846	GRMZM2G396846		GRMZM2G396846_T01	Exon_10_143067388_143067556	2	NON_SYNONYMOUS_CODING	gGg/gTg	gGg/gTg	392	1
10	143067474	T	A	SNP	Hom	GRMZM2G396846	GRMZM2G396846		GRMZM2G396846_T01	Exon_10_143067388_143067556	2	SYNONYMOUS_CODING	acT/acA	acT/acA	399	4
10	143067507	A	G	SNP	Hom	GRMZM2G396846	GRMZM2G396846		GRMZM2G396846_T01	Exon_10_143067388_143067556	2	SYNONYMOUS_CODING	gaA/gaG	gaA/gaG	410	2
10	143067512	C	G	SNP	Hom	GRMZM2G396846	GRMZM2G396846		GRMZM2G396846_T01	Exon_10_143067388_143067556	2	NON_SYNONYMOUS_CODING	aCg/aGg	aCg/aGg	412	1
10	143072305	C	A	SNP	Hom	GRMZM2G096107	GRMZM2G096107		GRMZM2G096107_T01	Exon_10_143071672_143072842	20	SYNONYMOUS_CODING	ccG/ccT	ccG/ccT	755	4
10	143072341	C	T	SNP	Hom	GRMZM2G096107	GRMZM2G096107		GRMZM2G096107_T01	Exon_10_143071672_143072842	20	SYNONYMOUS_CODING	tcG/tcA	tcG/tcA	743	4
10	143072416	A	G	SNP	Hom	GRMZM2G096107	GRMZM2G096107		GRMZM2G096107_T01	Exon_10_143071672_143072842	20	SYNONYMOUS_CODING	tgT/tgC	tgT/tgC	718	2
10	143072570	A	G	SNP	Hom	GRMZM2G096107	GRMZM2G096107		GRMZM2G096107_T01	Exon_10_143071672_143072842	20	NON_SYNONYMOUS_CODING	cTg/cCg	cTg/cCg	667	1
10	143072591	T	C	SNP	Hom	GRMZM2G096107	GRMZM2G096107		GRMZM2G096107_T01	Exon_10_143071672_143072842	20	NON_SYNONYMOUS_CODING	cAg/cGg	cAg/cGg	660	1
10	143072592	G	A	SNP	Hom	GRMZM2G096107	GRMZM2G096107		GRMZM2G096107_T01	Exon_10_143071672_143072842	20	STOP_GAINED	Cag/Tag	Cag/Tag	660	1
10	143072695	T	C	SNP	Hom	GRMZM2G096107	GRMZM2G096107		GRMZM2G096107_T01	Exon_10_143071672_143072842	20	SYNONYMOUS_CODING	gtA/gtG	gtA/gtG	625	4
10	143072781	C	G	SNP	Hom	GRMZM2G096107	GRMZM2G096107		GRMZM2G096107_T01	Exon_10_143071672_143072842	20	NON_SYNONYMOUS_CODING	Ggt/Cgt	Ggt/Cgt	597	1
10	143073530	A	G	SNP	Hom	GRMZM2G096107	GRMZM2G096107		GRMZM2G096107_T01	Exon_10_143073503_143073644	17	SYNONYMOUS_CODING	ggT/ggC	ggT/ggC	533	4
10	143073578	G	A	SNP	Hom	GRMZM2G096107	GRMZM2G096107		GRMZM2G096107_T01	Exon_10_143073503_143073644	17	SYNONYMOUS_CODING	taC/taT	taC/taT	517	2
10	143075919	A	G	SNP	Hom	GRMZM2G096107	GRMZM2G096107		GRMZM2G096107_T01	Exon_10_143075865_143075987	15	SYNONYMOUS_CODING	gcT/gcC	gcT/gcC	449	4
10	143075925	T	C	SNP	Hom	GRMZM2G096107	GRMZM2G096107		GRMZM2G096107_T01	Exon_10_143075865_143075987	15	SYNONYMOUS_CODING	cgA/cgG	cgA/cgG	447	4
10	143076123	C	T	SNP	Hom	GRMZM2G096107	GRMZM2G096107		GRMZM2G096107_T01	Exon_10_143076087_143076252	14	SYNONYMOUS_CODING	gcG/gcA	gcG/gcA	414	4
10	143076173	T	C	SNP	Hom	GRMZM2G096107	GRMZM2G096107		GRMZM2G096107_T01	Exon_10_143076087_143076252	14	NON_SYNONYMOUS_CODING	Att/Gtt	Att/Gtt	398	1
10	143076329	C	T	SNP	Hom	GRMZM2G096107	GRMZM2G096107		GRMZM2G096107_T01	Exon_10_143076316_143076419	13	NON_SYNONYMOUS_CODING	Gat/Aat	Gat/Aat	367	1
10	143079111	T	A	SNP	Hom	GRMZM2G096107	GRMZM2G096107		GRMZM2G096107_T01	Exon_10_143079063_143079160	12	SYNONYMOUS_CODING	ccA/ccT	ccA/ccT	320	4
10	143079126	G	A	SNP	Hom	GRMZM2G096107	GRMZM2G096107		GRMZM2G096107_T01	Exon_10_143079063_143079160	12	SYNONYMOUS_CODING	gcC/gcT	gcC/gcT	315	4
10	143079413	T	C	SNP	Hom	GRMZM2G096107	GRMZM2G096107		GRMZM2G096107_T01	Exon_10_143079277_143079479	11	SYNONYMOUS_CODING	tcA/tcG	tcA/tcG	258	4
10	143079631	G	A	SNP	Hom	GRMZM2G096107	GRMZM2G096107		GRMZM2G096107_T01	Exon_10_143079587_143079681	10	SYNONYMOUS_CODING	acC/acT	acC/acT	221	4
10	143081136	C	T	SNP	Hom	GRMZM2G096107	GRMZM2G096107		GRMZM2G096107_T01	Exon_10_143081115_143081189	6	SYNONYMOUS_CODING	ttG/ttA	ttG/ttA	120	2
10	143081485	G	T	SNP	Hom	GRMZM2G096107	GRMZM2G096107		GRMZM2G096107_T01	Exon_10_143081475_143081561	4	SYNONYMOUS_CODING	Cgg/Agg	Cgg/Agg	74	2
10	143081527	G	A	SNP	Hom	GRMZM2G096107	GRMZM2G096107		GRMZM2G096107_T01	Exon_10_143081475_143081561	4	NON_SYNONYMOUS_CODING	Cgc/Tgc	Cgc/Tgc	60	1
10	143081884	T	C	SNP	Hom	GRMZM2G096107	GRMZM2G096107		GRMZM2G096107_T01	Exon_10_143081863_143081995	2	SYNONYMOUS_CODING	ccA/ccG	ccA/ccG	6	4
10	143390533	C	G	SNP	Hom	GRMZM2G122897	GRMZM2G122897		GRMZM2G122897_T01	Exon_10_143390423_143390709	1	NON_SYNONYMOUS_CODING	gaG/gaC	gaG/gaC	24	2
10	143422320	G	A	SNP	Hom	GRMZM2G148492	GRMZM2G148492		GRMZM2G148492_T01	Exon_10_143421871_143422992	1	SYNONYMOUS_CODING	Ctg/Ttg	Ctg/Ttg	170	2
10	143442027	T	G	SNP	Hom	GRMZM2G148495	GRMZM2G148495		GRMZM2G148495_T01	Exon_10_143441814_143442333	1	NON_SYNONYMOUS_CODING	gaT/gaG	gaT/gaG	2	2
10	143442037	G	C	SNP	Hom	GRMZM2G148495	GRMZM2G148495		GRMZM2G148495_T01	Exon_10_143441814_143442333	1	NON_SYNONYMOUS_CODING	Gcc/Ccc	Gcc/Ccc	6	1
10	143442681	T	C	SNP	Hom	GRMZM2G148495	GRMZM2G148495		GRMZM2G148495_T01	Exon_10_143442664_143443046	3	SYNONYMOUS_CODING	gcT/gcC	gcT/gcC	140	4
10	143445876	T	C	SNP	Hom	GRMZM2G148499	GRMZM2G148499		GRMZM2G148499_T01	Exon_10_143445571_143446151	1	SYNONYMOUS_CODING	agT/agC	agT/agC	84	2
10	143461835	A	T	SNP	Hom	GRMZM2G148509	GRMZM2G148509		GRMZM2G148509_T01	Exon_10_143461477_143462117	1	NON_SYNONYMOUS_CODING	cAt/cTt	cAt/cTt	45	1
10	143461837	T	A	SNP	Hom	GRMZM2G148509	GRMZM2G148509		GRMZM2G148509_T01	Exon_10_143461477_143462117	1	NON_SYNONYMOUS_CODING	Tgt/Agt	Tgt/Agt	46	1
10	143461853	A	G	SNP	Hom	GRMZM2G148509	GRMZM2G148509		GRMZM2G148509_T01	Exon_10_143461477_143462117	1	NON_SYNONYMOUS_CODING	cAc/cGc	cAc/cGc	51	1
10	143461859	G	A	SNP	Hom	GRMZM2G148509	GRMZM2G148509		GRMZM2G148509_T01	Exon_10_143461477_143462117	1	NON_SYNONYMOUS_CODING	gGc/gAc	gGc/gAc	53	1
10	143461886	G	A	SNP	Hom	GRMZM2G148509	GRMZM2G148509		GRMZM2G148509_T01	Exon_10_143461477_143462117	1	STOP_GAINED	tGg/tAg	tGg/tAg	62	1
10	143461910	C	T	SNP	Hom	GRMZM2G148509	GRMZM2G148509		GRMZM2G148509_T01	Exon_10_143461477_143462117	1	NON_SYNONYMOUS_CODING	cCa/cTa	cCa/cTa	70	1
10	143461973	C	T	SNP	Hom	GRMZM2G148509	GRMZM2G148509		GRMZM2G148509_T01	Exon_10_143461477_143462117	1	NON_SYNONYMOUS_CODING	gCg/gTg	gCg/gTg	91	1
10	143461994	A	G	SNP	Hom	GRMZM2G148509	GRMZM2G148509		GRMZM2G148509_T01	Exon_10_143461477_143462117	1	NON_SYNONYMOUS_CODING	tAt/tGt	tAt/tGt	98	1
10	143462029	A	T	SNP	Hom	GRMZM2G148509	GRMZM2G148509		GRMZM2G148509_T01	Exon_10_143461477_143462117	1	NON_SYNONYMOUS_CODING	Atg/Ttg	Atg/Ttg	110	1
10	143462090	T	C	SNP	Hom	GRMZM2G148509	GRMZM2G148509		GRMZM2G148509_T01	Exon_10_143461477_143462117	1	NON_SYNONYMOUS_CODING	tTg/tCg	tTg/tCg	130	1
10	143481463	A	G	SNP	Hom	GRMZM2G448051	GRMZM2G448051		GRMZM2G448051_T01	Exon_10_143481339_143481530	2	NON_SYNONYMOUS_CODING	cAg/cGg	cAg/cGg	134	1
10	143481512	C	A	SNP	Hom	GRMZM2G448051	GRMZM2G448051		GRMZM2G448051_T01	Exon_10_143481339_143481530	2	SYNONYMOUS_CODING	gcC/gcA	gcC/gcA	150	4
10	143482211	G	A	SNP	Hom	GRMZM2G448051	GRMZM2G448051		GRMZM2G448051_T01	Exon_10_143482077_143482740	4	NON_SYNONYMOUS_CODING	Ggc/Agc	Ggc/Agc	258	1
10	143491570	G	A	SNP	Hom	GRMZM2G148594	GRMZM2G148594		GRMZM2G148594_T01	Exon_10_143491350_143492652	16	SYNONYMOUS_CODING	taC/taT	taC/taT	814	2
10	143491897	T	C	SNP	Hom	GRMZM2G148594	GRMZM2G148594		GRMZM2G148594_T01	Exon_10_143491350_143492652	16	SYNONYMOUS_CODING	ttA/ttG	ttA/ttG	705	2
10	143492596	A	T	SNP	Hom	GRMZM2G148594	GRMZM2G148594		GRMZM2G148594_T01	Exon_10_143491350_143492652	16	SYNONYMOUS_CODING	gtT/gtA	gtT/gtA	472	4
10	143495507	C	A	SNP	Hom	GRMZM2G148594	GRMZM2G148594		GRMZM2G148594_T01	Exon_10_143495428_143495521	9	SYNONYMOUS_CODING	cgG/cgT	cgG/cgT	257	4
10	143496319	T	C	SNP	Hom	GRMZM2G148594	GRMZM2G148594		GRMZM2G148594_T01	Exon_10_143496317_143496405	5	SYNONYMOUS_CODING	acA/acG	acA/acG	151	4
10	143506910	T	C	SNP	Hom	GRMZM2G148633	GRMZM2G148633		GRMZM2G148633_T01	Exon_10_143506750_143506980	2	NON_SYNONYMOUS_CODING	gTa/gCa	gTa/gCa	102	1
10	143507203	C	T	SNP	Hom	GRMZM2G148633	GRMZM2G148633		GRMZM2G148633_T01	Exon_10_143507194_143507250	4	NON_SYNONYMOUS_CODING	Cgc/Tgc	Cgc/Tgc	145	1
10	143512548	A	G	SNP	Hom	GRMZM2G448104	GRMZM2G448104		GRMZM2G448104_T02	Exon_10_143512527_143512802	19	SYNONYMOUS_CODING	gtT/gtC	gtT/gtC	239	4
10	143512548	A	G	SNP	Hom	GRMZM2G448104	GRMZM2G448104		GRMZM2G448104_T03	Exon_10_143512527_143512802	20	SYNONYMOUS_CODING	gtT/gtC	gtT/gtC	1087	4
10	143512548	A	G	SNP	Hom	GRMZM2G448104	GRMZM2G448104		GRMZM2G448104_T01	Exon_10_143512527_143512802	19	SYNONYMOUS_CODING	gtT/gtC	gtT/gtC	234	4
10	143531990	A	G	SNP	Hom	GRMZM2G448104	GRMZM2G448104		GRMZM2G448104_T03	Exon_10_143531668_143532040	8	SYNONYMOUS_CODING	gaT/gaC	gaT/gaC	284	2
10	143535666	C	G	SNP	Hom	GRMZM2G448104	GRMZM2G448104		GRMZM2G448104_T03	Exon_10_143535589_143535712	2	NON_SYNONYMOUS_CODING	Gcg/Ccg	Gcg/Ccg	10	1
10	143663324	G	A	SNP	Hom	GRMZM2G180471	GRMZM2G180471		GRMZM2G180471_T02	Exon_10_143663009_143663460	6	NON_SYNONYMOUS_CODING	gCg/gTg	gCg/gTg	284	1
10	143663324	G	A	SNP	Hom	GRMZM2G180471	GRMZM2G180471		GRMZM2G180471_T03	Exon_10_143662931_143663460	6	NON_SYNONYMOUS_CODING	gCg/gTg	gCg/gTg	284	1
10	143663324	G	A	SNP	Hom	GRMZM2G180471	GRMZM2G180471		GRMZM2G180471_T01	Exon_10_143662996_143663460	6	NON_SYNONYMOUS_CODING	gCg/gTg	gCg/gTg	284	1
10	143663626	T	C	SNP	Hom	GRMZM2G180471	GRMZM2G180471		GRMZM2G180471_T02	Exon_10_143663567_143663721	5	NON_SYNONYMOUS_CODING	Atc/Gtc	Atc/Gtc	219	1
10	143663626	T	C	SNP	Hom	GRMZM2G180471	GRMZM2G180471		GRMZM2G180471_T03	Exon_10_143663567_143663721	5	NON_SYNONYMOUS_CODING	Atc/Gtc	Atc/Gtc	219	1
10	143663626	T	C	SNP	Hom	GRMZM2G180471	GRMZM2G180471		GRMZM2G180471_T01	Exon_10_143663567_143663721	5	NON_SYNONYMOUS_CODING	Atc/Gtc	Atc/Gtc	219	1
10	143673863	C	G	SNP	Hom	GRMZM2G180471	GRMZM2G180471		GRMZM2G180471_T04	Exon_10_143673700_143674096	3	SYNONYMOUS_CODING	cgG/cgC	cgG/cgC	172	4
10	143673863	C	G	SNP	Hom	GRMZM2G180471	GRMZM2G180471		GRMZM2G180471_T02	Exon_10_143673820_143674096	4	SYNONYMOUS_CODING	cgG/cgC	cgG/cgC	172	4
10	143673863	C	G	SNP	Hom	GRMZM2G180471	GRMZM2G180471		GRMZM2G180471_T03	Exon_10_143673820_143674096	4	SYNONYMOUS_CODING	cgG/cgC	cgG/cgC	172	4
10	143673863	C	G	SNP	Hom	GRMZM2G180471	GRMZM2G180471		GRMZM2G180471_T01	Exon_10_143673820_143674096	4	SYNONYMOUS_CODING	cgG/cgC	cgG/cgC	172	4
10	143674085	C	A	SNP	Hom	GRMZM2G180471	GRMZM2G180471		GRMZM2G180471_T04	Exon_10_143673700_143674096	3	NON_SYNONYMOUS_CODING	tgG/tgT	tgG/tgT	98	1
10	143674085	C	A	SNP	Hom	GRMZM2G180471	GRMZM2G180471		GRMZM2G180471_T02	Exon_10_143673820_143674096	4	NON_SYNONYMOUS_CODING	tgG/tgT	tgG/tgT	98	1
10	143674085	C	A	SNP	Hom	GRMZM2G180471	GRMZM2G180471		GRMZM2G180471_T03	Exon_10_143673820_143674096	4	NON_SYNONYMOUS_CODING	tgG/tgT	tgG/tgT	98	1
10	143674085	C	A	SNP	Hom	GRMZM2G180471	GRMZM2G180471		GRMZM2G180471_T01	Exon_10_143673820_143674096	4	NON_SYNONYMOUS_CODING	tgG/tgT	tgG/tgT	98	1
10	143674226	A	G	SNP	Hom	GRMZM2G180471	GRMZM2G180471		GRMZM2G180471_T04	Exon_10_143674175_143674417	2	SYNONYMOUS_CODING	gaT/gaC	gaT/gaC	77	2
10	143674226	A	G	SNP	Hom	GRMZM2G180471	GRMZM2G180471		GRMZM2G180471_T02	Exon_10_143674175_143674417	3	SYNONYMOUS_CODING	gaT/gaC	gaT/gaC	77	2
10	143674226	A	G	SNP	Hom	GRMZM2G180471	GRMZM2G180471		GRMZM2G180471_T03	Exon_10_143674175_143674417	3	SYNONYMOUS_CODING	gaT/gaC	gaT/gaC	77	2
10	143674226	A	G	SNP	Hom	GRMZM2G180471	GRMZM2G180471		GRMZM2G180471_T01	Exon_10_143674175_143674417	3	SYNONYMOUS_CODING	gaT/gaC	gaT/gaC	77	2
10	143674322	C	T	SNP	Hom	GRMZM2G180471	GRMZM2G180471		GRMZM2G180471_T04	Exon_10_143674175_143674417	2	SYNONYMOUS_CODING	acG/acA	acG/acA	45	4
10	143674322	C	T	SNP	Hom	GRMZM2G180471	GRMZM2G180471		GRMZM2G180471_T02	Exon_10_143674175_143674417	3	SYNONYMOUS_CODING	acG/acA	acG/acA	45	4
10	143674322	C	T	SNP	Hom	GRMZM2G180471	GRMZM2G180471		GRMZM2G180471_T03	Exon_10_143674175_143674417	3	SYNONYMOUS_CODING	acG/acA	acG/acA	45	4
10	143674322	C	T	SNP	Hom	GRMZM2G180471	GRMZM2G180471		GRMZM2G180471_T01	Exon_10_143674175_143674417	3	SYNONYMOUS_CODING	acG/acA	acG/acA	45	4
10	143708947	T	G	SNP	Hom	GRMZM2G324781	GRMZM2G324781		GRMZM2G324781_T01	Exon_10_143708881_143709090	9	SYNONYMOUS_CODING	acA/acC	acA/acC	892	4
10	143708974	A	C	SNP	Hom	GRMZM2G324781	GRMZM2G324781		GRMZM2G324781_T01	Exon_10_143708881_143709090	9	SYNONYMOUS_CODING	gtT/gtG	gtT/gtG	883	4
10	143709007	C	G	SNP	Hom	GRMZM2G324781	GRMZM2G324781		GRMZM2G324781_T01	Exon_10_143708881_143709090	9	SYNONYMOUS_CODING	ccG/ccC	ccG/ccC	872	4
10	143709246	T	G	SNP	Hom	GRMZM2G324781	GRMZM2G324781		GRMZM2G324781_T01	Exon_10_143709192_143709698	8	SYNONYMOUS_CODING	gcA/gcC	gcA/gcC	826	4
10	143709552	T	C	SNP	Hom	GRMZM2G324781	GRMZM2G324781		GRMZM2G324781_T01	Exon_10_143709192_143709698	8	SYNONYMOUS_CODING	gcA/gcG	gcA/gcG	724	4
10	143709870	T	G	SNP	Hom	GRMZM2G324781	GRMZM2G324781		GRMZM2G324781_T01	Exon_10_143709826_143710047	7	NON_SYNONYMOUS_CODING	Att/Ctt	Att/Ctt	661	1
10	143711626	C	T	SNP	Hom	GRMZM2G324781	GRMZM2G324781		GRMZM2G324781_T01	Exon_10_143711133_143712090	5	SYNONYMOUS_CODING	ttG/ttA	ttG/ttA	393	2
10	143711770	C	T	SNP	Hom	GRMZM2G324781	GRMZM2G324781		GRMZM2G324781_T01	Exon_10_143711133_143712090	5	SYNONYMOUS_CODING	agG/agA	agG/agA	345	2
10	143711779	C	G	SNP	Hom	GRMZM2G324781	GRMZM2G324781		GRMZM2G324781_T01	Exon_10_143711133_143712090	5	SYNONYMOUS_CODING	tcG/tcC	tcG/tcC	342	4
10	143711951	T	C	SNP	Hom	GRMZM2G324781	GRMZM2G324781		GRMZM2G324781_T01	Exon_10_143711133_143712090	5	NON_SYNONYMOUS_CODING	gAc/gGc	gAc/gGc	285	1
10	143711970	C	T	SNP	Hom	GRMZM2G324781	GRMZM2G324781		GRMZM2G324781_T01	Exon_10_143711133_143712090	5	NON_SYNONYMOUS_CODING	Gac/Aac	Gac/Aac	279	1
10	143712783	C	G	SNP	Hom	GRMZM2G324781	GRMZM2G324781		GRMZM2G324781_T01	Exon_10_143712684_143712811	3	SYNONYMOUS_CODING	ccG/ccC	ccG/ccC	181	4
10	143713085	C	T	SNP	Hom	GRMZM2G324781	GRMZM2G324781		GRMZM2G324781_T01	Exon_10_143712944_143713112	2	NON_SYNONYMOUS_CODING	Ggc/Agc	Ggc/Agc	125	1
10	143713269	A	T	SNP	Hom	GRMZM2G324781	GRMZM2G324781		GRMZM2G324781_T01	Exon_10_143713207_143713551	1	NON_SYNONYMOUS_CODING	Tca/Aca	Tca/Aca	95	1
10	143713385	C	A	SNP	Hom	GRMZM2G324781	GRMZM2G324781		GRMZM2G324781_T01	Exon_10_143713207_143713551	1	NON_SYNONYMOUS_CODING	gGt/gTt	gGt/gTt	56	1
10	143713396	A	G	SNP	Hom	GRMZM2G324781	GRMZM2G324781		GRMZM2G324781_T01	Exon_10_143713207_143713551	1	SYNONYMOUS_CODING	taT/taC	taT/taC	52	2
10	143713399	G	A	SNP	Hom	GRMZM2G324781	GRMZM2G324781		GRMZM2G324781_T01	Exon_10_143713207_143713551	1	SYNONYMOUS_CODING	gaC/gaT	gaC/gaT	51	2
10	143713506	C	T	SNP	Hom	GRMZM2G324781	GRMZM2G324781		GRMZM2G324781_T01	Exon_10_143713207_143713551	1	NON_SYNONYMOUS_CODING	Gac/Aac	Gac/Aac	16	1
10	143717521	T	C	SNP	Hom	GRMZM2G023387	GRMZM2G023387		GRMZM2G023387_T01	Exon_10_143717248_143717649	3	SYNONYMOUS_CODING	gaA/gaG	gaA/gaG	120	2
10	143718523	G	C	SNP	Hom	GRMZM2G023387	GRMZM2G023387		GRMZM2G023387_T01	Exon_10_143718511_143718633	2	SYNONYMOUS_CODING	gtC/gtG	gtC/gtG	73	4
10	143718565	T	C	SNP	Hom	GRMZM2G023387	GRMZM2G023387		GRMZM2G023387_T01	Exon_10_143718511_143718633	2	SYNONYMOUS_CODING	ctA/ctG	ctA/ctG	59	4
10	143718616	C	T	SNP	Hom	GRMZM2G023387	GRMZM2G023387		GRMZM2G023387_T01	Exon_10_143718511_143718633	2	SYNONYMOUS_CODING	ggG/ggA	ggG/ggA	42	4
10	143739433	A	G	SNP	Hom	GRMZM2G097854	GRMZM2G097854		GRMZM2G097854_T01	Exon_10_143739227_143739439	3	SYNONYMOUS_CODING	ccA/ccG	ccA/ccG	169	4
10	143739433	A	G	SNP	Hom	GRMZM2G097854	GRMZM2G097854		GRMZM2G097854_T02	Exon_10_143739227_143739730	3	SYNONYMOUS_CODING	ccA/ccG	ccA/ccG	169	4
10	143739499	G	C	SNP	Hom	GRMZM2G097854	GRMZM2G097854		GRMZM2G097854_T02	Exon_10_143739227_143739730	3	SYNONYMOUS_CODING	tcG/tcC	tcG/tcC	191	4
10	143753175	C	A	SNP	Hom	GRMZM2G431504	GRMZM2G431504		GRMZM2G431504_T02	Exon_10_143752989_143753654	3	SYNONYMOUS_CODING	Cgg/Agg	Cgg/Agg	234	2
10	143753175	C	A	SNP	Hom	GRMZM2G431504	GRMZM2G431504		GRMZM2G431504_T01	Exon_10_143752989_143753362	3	SYNONYMOUS_CODING	Cgg/Agg	Cgg/Agg	234	2
10	144109430	C	G	SNP	Hom	GRMZM5G838853	GRMZM5G838853		GRMZM5G838853_T01	Exon_10_144109162_144109539	2	NON_SYNONYMOUS_CODING	Ctc/Gtc	Ctc/Gtc	201	1
10	144109449	A	C	SNP	Hom	GRMZM5G838853	GRMZM5G838853		GRMZM5G838853_T01	Exon_10_144109162_144109539	2	NON_SYNONYMOUS_CODING	gAc/gCc	gAc/gCc	207	1
10	144109450	C	G	SNP	Hom	GRMZM5G838853	GRMZM5G838853		GRMZM5G838853_T01	Exon_10_144109162_144109539	2	NON_SYNONYMOUS_CODING	gaC/gaG	gaC/gaG	207	2
10	144109463	G	T	SNP	Hom	GRMZM5G838853	GRMZM5G838853		GRMZM5G838853_T01	Exon_10_144109162_144109539	2	NON_SYNONYMOUS_CODING	Gct/Tct	Gct/Tct	212	1
10	144132974	A	G	SNP	Hom	GRMZM2G366270	GRMZM2G366270		GRMZM2G366270_T01	Exon_10_144132936_144133047	4	NON_SYNONYMOUS_CODING	aAt/aGt	aAt/aGt	62	1
10	144135254	A	C	SNP	Hom	GRMZM2G000650	GRMZM2G000650		GRMZM2G000650_T01	Exon_10_144135242_144135949	3	SYNONYMOUS_CODING	Aga/Cga	Aga/Cga	52	2
10	144143002	A	G	SNP	Hom	GRMZM2G000633	GRMZM2G000633		GRMZM2G000633_T01	Exon_10_144142963_144143208	1	NON_SYNONYMOUS_CODING	Tcc/Ccc	Tcc/Ccc	66	1
10	144144031	G	A	SNP	Hom	GRMZM2G000620	GRMZM2G000620		GRMZM2G000620_T01	Exon_10_144143811_144145220	1	SYNONYMOUS_CODING	acG/acA	acG/acA	43	4
10	144144498	A	G	SNP	Hom	GRMZM2G000620	GRMZM2G000620		GRMZM2G000620_T01	Exon_10_144143811_144145220	1	NON_SYNONYMOUS_CODING	aAg/aGg	aAg/aGg	199	1
10	144144505	T	G	SNP	Hom	GRMZM2G000620	GRMZM2G000620		GRMZM2G000620_T01	Exon_10_144143811_144145220	1	SYNONYMOUS_CODING	ctT/ctG	ctT/ctG	201	4
10	144144517	T	C	SNP	Hom	GRMZM2G000620	GRMZM2G000620		GRMZM2G000620_T01	Exon_10_144143811_144145220	1	SYNONYMOUS_CODING	gtT/gtC	gtT/gtC	205	4
10	144144553	T	G	SNP	Hom	GRMZM2G000620	GRMZM2G000620		GRMZM2G000620_T01	Exon_10_144143811_144145220	1	SYNONYMOUS_CODING	ggT/ggG	ggT/ggG	217	4
10	144144568	C	T	SNP	Hom	GRMZM2G000620	GRMZM2G000620		GRMZM2G000620_T01	Exon_10_144143811_144145220	1	SYNONYMOUS_CODING	cgC/cgT	cgC/cgT	222	4
10	144145096	C	T	SNP	Hom	GRMZM2G000620	GRMZM2G000620		GRMZM2G000620_T01	Exon_10_144143811_144145220	1	SYNONYMOUS_CODING	gcC/gcT	gcC/gcT	398	4
10	144145333	G	A	SNP	Hom	GRMZM2G000620	GRMZM2G000620		GRMZM2G000620_T01	Exon_10_144145325_144145432	2	NON_SYNONYMOUS_CODING	Gag/Aag	Gag/Aag	443	1
10	144145341	C	T	SNP	Hom	GRMZM2G000620	GRMZM2G000620		GRMZM2G000620_T01	Exon_10_144145325_144145432	2	SYNONYMOUS_CODING	gtC/gtT	gtC/gtT	445	4
10	144145356	T	C	SNP	Hom	GRMZM2G000620	GRMZM2G000620		GRMZM2G000620_T01	Exon_10_144145325_144145432	2	SYNONYMOUS_CODING	atT/atC	atT/atC	450	3
10	144145429	A	C	SNP	Hom	GRMZM2G000620	GRMZM2G000620		GRMZM2G000620_T01	Exon_10_144145325_144145432	2	SYNONYMOUS_CODING	Aga/Cga	Aga/Cga	475	2
10	144146272	G	T	SNP	Hom	GRMZM2G000620	GRMZM2G000620		GRMZM2G000620_T01	Exon_10_144146154_144146391	5	SYNONYMOUS_CODING	ctG/ctT	ctG/ctT	646	4
10	144146497	T	A	SNP	Hom	GRMZM2G000620	GRMZM2G000620		GRMZM2G000620_T01	Exon_10_144146485_144146632	6	SYNONYMOUS_CODING	tcT/tcA	tcT/tcA	690	4
10	144146517	G	A	SNP	Hom	GRMZM2G000620	GRMZM2G000620		GRMZM2G000620_T01	Exon_10_144146485_144146632	6	NON_SYNONYMOUS_CODING	gGc/gAc	gGc/gAc	697	1
10	144146796	T	C	SNP	Hom	GRMZM2G000620	GRMZM2G000620		GRMZM2G000620_T01	Exon_10_144146744_144146918	7	NON_SYNONYMOUS_CODING	cTg/cCg	cTg/cCg	753	1
10	144313014	G	A	SNP	Hom	GRMZM2G016097	GRMZM2G016097		GRMZM2G016097_T02	Exon_10_144313000_144313178	6	SYNONYMOUS_CODING	acG/acA	acG/acA	48	4
10	144313014	G	A	SNP	Hom	GRMZM2G016097	GRMZM2G016097		GRMZM2G016097_T01	Exon_10_144313000_144313476	5	SYNONYMOUS_CODING	acG/acA	acG/acA	133	4
10	144445068	C	G	SNP	Hom	GRMZM2G143102	GRMZM2G143102		GRMZM2G143102_T01	Exon_10_144444664_144446585	2	NON_SYNONYMOUS_CODING	gaC/gaG	gaC/gaG	208	2
10	144445710	C	T	SNP	Hom	GRMZM2G143102	GRMZM2G143102		GRMZM2G143102_T01	Exon_10_144444664_144446585	2	SYNONYMOUS_CODING	aaC/aaT	aaC/aaT	422	2
10	144445755	C	T	SNP	Hom	GRMZM2G143102	GRMZM2G143102		GRMZM2G143102_T01	Exon_10_144444664_144446585	2	SYNONYMOUS_CODING	tgC/tgT	tgC/tgT	437	2
10	144446031	C	T	SNP	Hom	GRMZM2G143102	GRMZM2G143102		GRMZM2G143102_T01	Exon_10_144444664_144446585	2	SYNONYMOUS_CODING	atC/atT	atC/atT	529	3
10	144447170	A	G	SNP	Hom	GRMZM2G443819	GRMZM2G443819		GRMZM2G443819_T01	Exon_10_144446992_144448153	2	SYNONYMOUS_CODING	agT/agC	agT/agC	384	2
10	144447299	T	C	SNP	Hom	GRMZM2G443819	GRMZM2G443819		GRMZM2G443819_T01	Exon_10_144446992_144448153	2	SYNONYMOUS_CODING	tcA/tcG	tcA/tcG	341	4
10	144447505	C	T	SNP	Hom	GRMZM2G443819	GRMZM2G443819		GRMZM2G443819_T01	Exon_10_144446992_144448153	2	NON_SYNONYMOUS_CODING	Gag/Aag	Gag/Aag	273	1
10	144447519	C	T	SNP	Hom	GRMZM2G443819	GRMZM2G443819		GRMZM2G443819_T01	Exon_10_144446992_144448153	2	NON_SYNONYMOUS_CODING	aGc/aAc	aGc/aAc	268	1
10	144447771	G	A	SNP	Hom	GRMZM2G443819	GRMZM2G443819		GRMZM2G443819_T01	Exon_10_144446992_144448153	2	NON_SYNONYMOUS_CODING	gCg/gTg	gCg/gTg	184	1
10	144447848	C	G	SNP	Hom	GRMZM2G443819	GRMZM2G443819		GRMZM2G443819_T01	Exon_10_144446992_144448153	2	SYNONYMOUS_CODING	tcG/tcC	tcG/tcC	158	4
10	144447923	T	C	SNP	Hom	GRMZM2G443819	GRMZM2G443819		GRMZM2G443819_T01	Exon_10_144446992_144448153	2	SYNONYMOUS_CODING	acA/acG	acA/acG	133	4
10	144447934	T	G	SNP	Hom	GRMZM2G443819	GRMZM2G443819		GRMZM2G443819_T01	Exon_10_144446992_144448153	2	NON_SYNONYMOUS_CODING	Aca/Cca	Aca/Cca	130	1
10	144447951	C	T	SNP	Hom	GRMZM2G443819	GRMZM2G443819		GRMZM2G443819_T01	Exon_10_144446992_144448153	2	NON_SYNONYMOUS_CODING	aGt/aAt	aGt/aAt	124	1
10	144448112	A	G	SNP	Hom	GRMZM2G443819	GRMZM2G443819		GRMZM2G443819_T01	Exon_10_144446992_144448153	2	SYNONYMOUS_CODING	gaT/gaC	gaT/gaC	70	2
10	144450050	T	C	SNP	Hom	GRMZM2G443819	GRMZM2G443819		GRMZM2G443819_T01	Exon_10_144449893_144450060	1	NON_SYNONYMOUS_CODING	aAc/aGc	aAc/aGc	4	1
10	144455149	A	G	SNP	Hom	GRMZM2G143071	GRMZM2G143071		GRMZM2G143071_T01	Exon_10_144455053_144455172	8	SYNONYMOUS_CODING	atT/atC	atT/atC	395	3
10	144455149	A	G	SNP	Hom	GRMZM2G143071	GRMZM2G143071		GRMZM2G143071_T02	Exon_10_144455053_144455172	8	SYNONYMOUS_CODING	atT/atC	atT/atC	395	3
10	144455283	A	T	SNP	Hom	GRMZM2G143071	GRMZM2G143071		GRMZM2G143071_T01	Exon_10_144455260_144455352	7	NON_SYNONYMOUS_CODING	Ttg/Atg	Ttg/Atg	380	2
10	144455283	A	T	SNP	Hom	GRMZM2G143071	GRMZM2G143071		GRMZM2G143071_T02	Exon_10_144455260_144455352	7	NON_SYNONYMOUS_CODING	Ttg/Atg	Ttg/Atg	380	2
10	144455289	G	C	SNP	Hom	GRMZM2G143071	GRMZM2G143071		GRMZM2G143071_T01	Exon_10_144455260_144455352	7	NON_SYNONYMOUS_CODING	Caa/Gaa	Caa/Gaa	378	1
10	144455289	G	C	SNP	Hom	GRMZM2G143071	GRMZM2G143071		GRMZM2G143071_T02	Exon_10_144455260_144455352	7	NON_SYNONYMOUS_CODING	Caa/Gaa	Caa/Gaa	378	1
10	144455316	A	T	SNP	Hom	GRMZM2G143071	GRMZM2G143071		GRMZM2G143071_T01	Exon_10_144455260_144455352	7	NON_SYNONYMOUS_CODING	Tta/Ata	Tta/Ata	369	2
10	144455316	A	T	SNP	Hom	GRMZM2G143071	GRMZM2G143071		GRMZM2G143071_T02	Exon_10_144455260_144455352	7	NON_SYNONYMOUS_CODING	Tta/Ata	Tta/Ata	369	2
10	144456121	T	C	SNP	Hom	GRMZM2G143071	GRMZM2G143071		GRMZM2G143071_T01	Exon_10_144455996_144456151	5	NON_SYNONYMOUS_CODING	Att/Gtt	Att/Gtt	289	1
10	144456121	T	C	SNP	Hom	GRMZM2G143071	GRMZM2G143071		GRMZM2G143071_T02	Exon_10_144455996_144456151	5	NON_SYNONYMOUS_CODING	Att/Gtt	Att/Gtt	289	1
10	144457291	T	C	SNP	Hom	GRMZM2G143071	GRMZM2G143071		GRMZM2G143071_T01	Exon_10_144457220_144457891	3	NON_SYNONYMOUS_CODING	Att/Gtt	Att/Gtt	226	1
10	144457291	T	C	SNP	Hom	GRMZM2G143071	GRMZM2G143071		GRMZM2G143071_T02	Exon_10_144457220_144457891	3	NON_SYNONYMOUS_CODING	Att/Gtt	Att/Gtt	226	1
10	144457300	C	T	SNP	Hom	GRMZM2G143071	GRMZM2G143071		GRMZM2G143071_T01	Exon_10_144457220_144457891	3	NON_SYNONYMOUS_CODING	Gac/Aac	Gac/Aac	223	1
10	144457300	C	T	SNP	Hom	GRMZM2G143071	GRMZM2G143071		GRMZM2G143071_T02	Exon_10_144457220_144457891	3	NON_SYNONYMOUS_CODING	Gac/Aac	Gac/Aac	223	1
10	144457382	A	G	SNP	Hom	GRMZM2G143071	GRMZM2G143071		GRMZM2G143071_T01	Exon_10_144457220_144457891	3	SYNONYMOUS_CODING	tcT/tcC	tcT/tcC	195	4
10	144457382	A	G	SNP	Hom	GRMZM2G143071	GRMZM2G143071		GRMZM2G143071_T02	Exon_10_144457220_144457891	3	SYNONYMOUS_CODING	tcT/tcC	tcT/tcC	195	4
10	144457386	T	A	SNP	Hom	GRMZM2G143071	GRMZM2G143071		GRMZM2G143071_T01	Exon_10_144457220_144457891	3	NON_SYNONYMOUS_CODING	gAt/gTt	gAt/gTt	194	1
10	144457386	T	A	SNP	Hom	GRMZM2G143071	GRMZM2G143071		GRMZM2G143071_T02	Exon_10_144457220_144457891	3	NON_SYNONYMOUS_CODING	gAt/gTt	gAt/gTt	194	1
10	144457456	G	C	SNP	Hom	GRMZM2G143071	GRMZM2G143071		GRMZM2G143071_T01	Exon_10_144457220_144457891	3	NON_SYNONYMOUS_CODING	Caa/Gaa	Caa/Gaa	171	1
10	144457456	G	C	SNP	Hom	GRMZM2G143071	GRMZM2G143071		GRMZM2G143071_T02	Exon_10_144457220_144457891	3	NON_SYNONYMOUS_CODING	Caa/Gaa	Caa/Gaa	171	1
10	144457513	C	T	SNP	Hom	GRMZM2G143071	GRMZM2G143071		GRMZM2G143071_T01	Exon_10_144457220_144457891	3	NON_SYNONYMOUS_CODING	Gca/Aca	Gca/Aca	152	1
10	144457513	C	T	SNP	Hom	GRMZM2G143071	GRMZM2G143071		GRMZM2G143071_T02	Exon_10_144457220_144457891	3	NON_SYNONYMOUS_CODING	Gca/Aca	Gca/Aca	152	1
10	144457522	C	T	SNP	Hom	GRMZM2G143071	GRMZM2G143071		GRMZM2G143071_T01	Exon_10_144457220_144457891	3	NON_SYNONYMOUS_CODING	Ggg/Agg	Ggg/Agg	149	1
10	144457522	C	T	SNP	Hom	GRMZM2G143071	GRMZM2G143071		GRMZM2G143071_T02	Exon_10_144457220_144457891	3	NON_SYNONYMOUS_CODING	Ggg/Agg	Ggg/Agg	149	1
10	144457582	C	T	SNP	Hom	GRMZM2G143071	GRMZM2G143071		GRMZM2G143071_T01	Exon_10_144457220_144457891	3	NON_SYNONYMOUS_CODING	Gcc/Acc	Gcc/Acc	129	1
10	144457582	C	T	SNP	Hom	GRMZM2G143071	GRMZM2G143071		GRMZM2G143071_T02	Exon_10_144457220_144457891	3	NON_SYNONYMOUS_CODING	Gcc/Acc	Gcc/Acc	129	1
10	144457629	G	A	SNP	Hom	GRMZM2G143071	GRMZM2G143071		GRMZM2G143071_T01	Exon_10_144457220_144457891	3	NON_SYNONYMOUS_CODING	cCt/cTt	cCt/cTt	113	1
10	144457629	G	A	SNP	Hom	GRMZM2G143071	GRMZM2G143071		GRMZM2G143071_T02	Exon_10_144457220_144457891	3	NON_SYNONYMOUS_CODING	cCt/cTt	cCt/cTt	113	1
10	144457667	C	A	SNP	Hom	GRMZM2G143071	GRMZM2G143071		GRMZM2G143071_T01	Exon_10_144457220_144457891	3	NON_SYNONYMOUS_CODING	aaG/aaT	aaG/aaT	100	2
10	144457667	C	A	SNP	Hom	GRMZM2G143071	GRMZM2G143071		GRMZM2G143071_T02	Exon_10_144457220_144457891	3	NON_SYNONYMOUS_CODING	aaG/aaT	aaG/aaT	100	2
10	144457701	A	T	SNP	Hom	GRMZM2G143071	GRMZM2G143071		GRMZM2G143071_T01	Exon_10_144457220_144457891	3	NON_SYNONYMOUS_CODING	tTt/tAt	tTt/tAt	89	1
10	144457701	A	T	SNP	Hom	GRMZM2G143071	GRMZM2G143071		GRMZM2G143071_T02	Exon_10_144457220_144457891	3	NON_SYNONYMOUS_CODING	tTt/tAt	tTt/tAt	89	1
10	144457724	T	C	SNP	Hom	GRMZM2G143071	GRMZM2G143071		GRMZM2G143071_T01	Exon_10_144457220_144457891	3	SYNONYMOUS_CODING	caA/caG	caA/caG	81	2
10	144457724	T	C	SNP	Hom	GRMZM2G143071	GRMZM2G143071		GRMZM2G143071_T02	Exon_10_144457220_144457891	3	SYNONYMOUS_CODING	caA/caG	caA/caG	81	2
10	144457810	C	G	SNP	Hom	GRMZM2G143071	GRMZM2G143071		GRMZM2G143071_T01	Exon_10_144457220_144457891	3	NON_SYNONYMOUS_CODING	Gga/Cga	Gga/Cga	53	1
10	144457810	C	G	SNP	Hom	GRMZM2G143071	GRMZM2G143071		GRMZM2G143071_T02	Exon_10_144457220_144457891	3	NON_SYNONYMOUS_CODING	Gga/Cga	Gga/Cga	53	1
10	144458779	A	C	SNP	Hom	GRMZM2G143071	GRMZM2G143071		GRMZM2G143071_T01	Exon_10_144458775_144458838	2	NON_SYNONYMOUS_CODING	gTc/gGc	gTc/gGc	24	1
10	144458779	A	C	SNP	Hom	GRMZM2G143071	GRMZM2G143071		GRMZM2G143071_T02	Exon_10_144458775_144458838	2	NON_SYNONYMOUS_CODING	gTc/gGc	gTc/gGc	24	1
10	144458787	C	A	SNP	Hom	GRMZM2G143071	GRMZM2G143071		GRMZM2G143071_T01	Exon_10_144458775_144458838	2	SYNONYMOUS_CODING	ccG/ccT	ccG/ccT	21	4
10	144458787	C	A	SNP	Hom	GRMZM2G143071	GRMZM2G143071		GRMZM2G143071_T02	Exon_10_144458775_144458838	2	SYNONYMOUS_CODING	ccG/ccT	ccG/ccT	21	4
10	144462912	T	C	SNP	Hom	GRMZM2G143035	GRMZM2G143035		GRMZM2G143035_T01	Exon_10_144461995_144463334	1	NON_SYNONYMOUS_CODING	Agt/Ggt	Agt/Ggt	56	1
10	144462913	A	G	SNP	Hom	GRMZM2G143035	GRMZM2G143035		GRMZM2G143035_T01	Exon_10_144461995_144463334	1	SYNONYMOUS_CODING	gaT/gaC	gaT/gaC	55	2
10	144463001	A	G	SNP	Hom	GRMZM2G143035	GRMZM2G143035		GRMZM2G143035_T01	Exon_10_144461995_144463334	1	NON_SYNONYMOUS_CODING	cTa/cCa	cTa/cCa	26	1
10	144463037	C	G	SNP	Hom	GRMZM2G143035	GRMZM2G143035		GRMZM2G143035_T01	Exon_10_144461995_144463334	1	NON_SYNONYMOUS_CODING	aGg/aCg	aGg/aCg	14	1
10	144463058	A	G	SNP	Hom	GRMZM2G143035	GRMZM2G143035		GRMZM2G143035_T01	Exon_10_144461995_144463334	1	NON_SYNONYMOUS_CODING	aTg/aCg	aTg/aCg	7	1
10	144469550	A	G	SNP	Hom	GRMZM2G037226	GRMZM2G037226		GRMZM2G037226_T01	Exon_10_144469324_144470979	1	NON_SYNONYMOUS_CODING	gTt/gCt	gTt/gCt	450	1
10	144469550	A	G	SNP	Hom	GRMZM2G037226	GRMZM2G037226		GRMZM2G037226_T02	Exon_10_144468823_144471037	1	NON_SYNONYMOUS_CODING	gTt/gCt	gTt/gCt	450	1
10	144469845	G	C	SNP	Hom	GRMZM2G037226	GRMZM2G037226		GRMZM2G037226_T01	Exon_10_144469324_144470979	1	NON_SYNONYMOUS_CODING	Cca/Gca	Cca/Gca	352	1
10	144469845	G	C	SNP	Hom	GRMZM2G037226	GRMZM2G037226		GRMZM2G037226_T02	Exon_10_144468823_144471037	1	NON_SYNONYMOUS_CODING	Cca/Gca	Cca/Gca	352	1
10	144470137	G	A	SNP	Hom	GRMZM2G037226	GRMZM2G037226		GRMZM2G037226_T01	Exon_10_144469324_144470979	1	SYNONYMOUS_CODING	ttC/ttT	ttC/ttT	254	2
10	144470137	G	A	SNP	Hom	GRMZM2G037226	GRMZM2G037226		GRMZM2G037226_T02	Exon_10_144468823_144471037	1	SYNONYMOUS_CODING	ttC/ttT	ttC/ttT	254	2
10	144470727	C	T	SNP	Hom	GRMZM2G037226	GRMZM2G037226		GRMZM2G037226_T01	Exon_10_144469324_144470979	1	NON_SYNONYMOUS_CODING	Gat/Aat	Gat/Aat	58	1
10	144470727	C	T	SNP	Hom	GRMZM2G037226	GRMZM2G037226		GRMZM2G037226_T02	Exon_10_144468823_144471037	1	NON_SYNONYMOUS_CODING	Gat/Aat	Gat/Aat	58	1
10	144725062	C	T	SNP	Hom	GRMZM2G427031	GRMZM2G427031		GRMZM2G427031_T01	Exon_10_144725039_144725158	11	SYNONYMOUS_CODING	gtC/gtT	gtC/gtT	450	4
10	144725153	G	C	SNP	Hom	GRMZM2G427031	GRMZM2G427031		GRMZM2G427031_T01	Exon_10_144725039_144725158	11	NON_SYNONYMOUS_CODING	Gtc/Ctc	Gtc/Ctc	481	1
10	144725153	G	C	SNP	Hom	GRMZM2G427031	GRMZM2G427031		GRMZM2G427031_T03	Exon_10_144724838_144725158	1	NON_SYNONYMOUS_CODING	Gtc/Ctc	Gtc/Ctc	30	1
10	144725606	A	T	SNP	Hom	GRMZM2G427031	GRMZM2G427031		GRMZM2G427031_T01	Exon_10_144725608_144725630	13	SPLICE_SITE_ACCEPTOR
10	144725956	C	T	SNP	Hom	GRMZM2G427031	GRMZM2G427031		GRMZM2G427031_T01	Exon_10_144725883_144726210	14	NON_SYNONYMOUS_CODING	Ccg/Tcg	Ccg/Tcg	543	1
10	144725956	C	T	SNP	Hom	GRMZM2G427031	GRMZM2G427031		GRMZM2G427031_T03	Exon_10_144725883_144726178	4	NON_SYNONYMOUS_CODING	Ccg/Tcg	Ccg/Tcg	115	1
10	144725986	G	A	SNP	Hom	GRMZM2G427031	GRMZM2G427031		GRMZM2G427031_T01	Exon_10_144725883_144726210	14	NON_SYNONYMOUS_CODING	Gaa/Aaa	Gaa/Aaa	553	1
10	144725986	G	A	SNP	Hom	GRMZM2G427031	GRMZM2G427031		GRMZM2G427031_T03	Exon_10_144725883_144726178	4	NON_SYNONYMOUS_CODING	Gaa/Aaa	Gaa/Aaa	125	1
10	144725996	A	G	SNP	Hom	GRMZM2G427031	GRMZM2G427031		GRMZM2G427031_T01	Exon_10_144725883_144726210	14	NON_SYNONYMOUS_CODING	aAt/aGt	aAt/aGt	556	1
10	144725996	A	G	SNP	Hom	GRMZM2G427031	GRMZM2G427031		GRMZM2G427031_T03	Exon_10_144725883_144726178	4	NON_SYNONYMOUS_CODING	aAt/aGt	aAt/aGt	128	1
10	144726079	T	A	SNP	Hom	GRMZM2G427031	GRMZM2G427031		GRMZM2G427031_T01	Exon_10_144725883_144726210	14	NON_SYNONYMOUS_CODING	Ttg/Atg	Ttg/Atg	584	2
10	144726079	T	A	SNP	Hom	GRMZM2G427031	GRMZM2G427031		GRMZM2G427031_T03	Exon_10_144725883_144726178	4	NON_SYNONYMOUS_CODING	Ttg/Atg	Ttg/Atg	156	2
10	144726087	A	T	SNP	Hom	GRMZM2G427031	GRMZM2G427031		GRMZM2G427031_T01	Exon_10_144725883_144726210	14	SYNONYMOUS_CODING	tcA/tcT	tcA/tcT	586	4
10	144726087	A	T	SNP	Hom	GRMZM2G427031	GRMZM2G427031		GRMZM2G427031_T03	Exon_10_144725883_144726178	4	SYNONYMOUS_CODING	tcA/tcT	tcA/tcT	158	4
10	144726091	T	C	SNP	Hom	GRMZM2G427031	GRMZM2G427031		GRMZM2G427031_T01	Exon_10_144725883_144726210	14	NON_SYNONYMOUS_CODING	Tca/Cca	Tca/Cca	588	1
10	144726091	T	C	SNP	Hom	GRMZM2G427031	GRMZM2G427031		GRMZM2G427031_T03	Exon_10_144725883_144726178	4	NON_SYNONYMOUS_CODING	Tca/Cca	Tca/Cca	160	1
10	144726257	C	T	SNP	Hom	GRMZM2G427031	GRMZM2G427031		GRMZM2G427031_T03	Exon_10_144726256_144726484	5	SYNONYMOUS_CODING	gtC/gtT	gtC/gtT	189	4
10	144726366	A	G	SNP	Hom	GRMZM2G427031	GRMZM2G427031		GRMZM2G427031_T01	Exon_10_144726288_144726484	15	NON_SYNONYMOUS_CODING	Aat/Gat	Aat/Gat	654	1
10	144726366	A	G	SNP	Hom	GRMZM2G427031	GRMZM2G427031		GRMZM2G427031_T03	Exon_10_144726256_144726484	5	NON_SYNONYMOUS_CODING	Aat/Gat	Aat/Gat	226	1
10	144726371	C	T	SNP	Hom	GRMZM2G427031	GRMZM2G427031		GRMZM2G427031_T01	Exon_10_144726288_144726484	15	SYNONYMOUS_CODING	gaC/gaT	gaC/gaT	655	2
10	144726371	C	T	SNP	Hom	GRMZM2G427031	GRMZM2G427031		GRMZM2G427031_T03	Exon_10_144726256_144726484	5	SYNONYMOUS_CODING	gaC/gaT	gaC/gaT	227	2
10	144726425	T	C	SNP	Hom	GRMZM2G427031	GRMZM2G427031		GRMZM2G427031_T01	Exon_10_144726288_144726484	15	SYNONYMOUS_CODING	gcT/gcC	gcT/gcC	673	4
10	144726425	T	C	SNP	Hom	GRMZM2G427031	GRMZM2G427031		GRMZM2G427031_T03	Exon_10_144726256_144726484	5	SYNONYMOUS_CODING	gcT/gcC	gcT/gcC	245	4
10	144726633	G	A	SNP	Hom	GRMZM2G427031	GRMZM2G427031		GRMZM2G427031_T01	Exon_10_144726609_144726813	16	SYNONYMOUS_CODING	ctG/ctA	ctG/ctA	701	4
10	144726633	G	A	SNP	Hom	GRMZM2G427031	GRMZM2G427031		GRMZM2G427031_T03	Exon_10_144726609_144726813	6	SYNONYMOUS_CODING	ctG/ctA	ctG/ctA	273	4
10	144727371	T	C	SNP	Hom	GRMZM2G427031	GRMZM2G427031		GRMZM2G427031_T03	Exon_10_144727348_144727744	7	SYNONYMOUS_CODING	ggT/ggC	ggT/ggC	341	4
10	144728319	G	A	SNP	Hom	GRMZM2G427031	GRMZM2G427031		GRMZM2G427031_T01	Exon_10_144728227_144728338	17	SYNONYMOUS_CODING	caG/caA	caG/caA	792	2
10	144728484	G	A	SNP	Hom	GRMZM2G427031	GRMZM2G427031		GRMZM2G427031_T01	Exon_10_144728430_144728843	18	NON_SYNONYMOUS_CODING	gGa/gAa	gGa/gAa	817	1
10	144728505	A	G	SNP	Hom	GRMZM2G427031	GRMZM2G427031		GRMZM2G427031_T01	Exon_10_144728430_144728843	18	NON_SYNONYMOUS_CODING	cAg/cGg	cAg/cGg	824	1
10	144728552	G	T	SNP	Hom	GRMZM2G427031	GRMZM2G427031		GRMZM2G427031_T01	Exon_10_144728430_144728843	18	NON_SYNONYMOUS_CODING	Gct/Tct	Gct/Tct	840	1
10	144728631	C	A	SNP	Hom	GRMZM2G427031	GRMZM2G427031		GRMZM2G427031_T01	Exon_10_144728430_144728843	18	NON_SYNONYMOUS_CODING	gCa/gAa	gCa/gAa	866	1
10	144728639	A	G	SNP	Hom	GRMZM2G427031	GRMZM2G427031		GRMZM2G427031_T01	Exon_10_144728430_144728843	18	NON_SYNONYMOUS_CODING	Aca/Gca	Aca/Gca	869	1
10	144728680	G	A	SNP	Hom	GRMZM2G427031	GRMZM2G427031		GRMZM2G427031_T01	Exon_10_144728430_144728843	18	SYNONYMOUS_CODING	ggG/ggA	ggG/ggA	882	4
10	144728684	A	G	SNP	Hom	GRMZM2G427031	GRMZM2G427031		GRMZM2G427031_T01	Exon_10_144728430_144728843	18	NON_SYNONYMOUS_CODING	Aag/Gag	Aag/Gag	884	1
10	144728739	A	G	SNP	Hom	GRMZM2G427031	GRMZM2G427031		GRMZM2G427031_T01	Exon_10_144728430_144728843	18	NON_SYNONYMOUS_CODING	gAa/gGa	gAa/gGa	902	1
10	144728740	A	T	SNP	Hom	GRMZM2G427031	GRMZM2G427031		GRMZM2G427031_T01	Exon_10_144728430_144728843	18	NON_SYNONYMOUS_CODING	gaA/gaT	gaA/gaT	902	2
10	144731494	C	G	SNP	Hom	GRMZM2G427031	GRMZM2G427031		GRMZM2G427031_T04	Exon_10_144731444_144732059	2	NON_SYNONYMOUS_CODING	gCg/gGg	gCg/gGg	9	1
10	144731494	C	G	SNP	Hom	GRMZM2G427031	GRMZM2G427031		GRMZM2G427031_T01	Exon_10_144731476_144732059	19	NON_SYNONYMOUS_CODING	gCg/gGg	gCg/gGg	943	1
10	144731555	A	G	SNP	Hom	GRMZM2G427031	GRMZM2G427031		GRMZM2G427031_T04	Exon_10_144731444_144732059	2	SYNONYMOUS_CODING	gcA/gcG	gcA/gcG	29	4
10	144731555	A	G	SNP	Hom	GRMZM2G427031	GRMZM2G427031		GRMZM2G427031_T01	Exon_10_144731476_144732059	19	SYNONYMOUS_CODING	gcA/gcG	gcA/gcG	963	4
10	144731657	C	T	SNP	Hom	GRMZM2G427031	GRMZM2G427031		GRMZM2G427031_T04	Exon_10_144731444_144732059	2	SYNONYMOUS_CODING	aaC/aaT	aaC/aaT	63	2
10	144731657	C	T	SNP	Hom	GRMZM2G427031	GRMZM2G427031		GRMZM2G427031_T01	Exon_10_144731476_144732059	19	SYNONYMOUS_CODING	aaC/aaT	aaC/aaT	997	2
10	144731916	A	G	SNP	Hom	GRMZM2G427031	GRMZM2G427031		GRMZM2G427031_T04	Exon_10_144731444_144732059	2	NON_SYNONYMOUS_CODING	Atc/Gtc	Atc/Gtc	150	1
10	144731916	A	G	SNP	Hom	GRMZM2G427031	GRMZM2G427031		GRMZM2G427031_T01	Exon_10_144731476_144732059	19	NON_SYNONYMOUS_CODING	Atc/Gtc	Atc/Gtc	1084	1
10	144732002	T	C	SNP	Hom	GRMZM2G427031	GRMZM2G427031		GRMZM2G427031_T04	Exon_10_144731444_144732059	2	SYNONYMOUS_CODING	caT/caC	caT/caC	178	2
10	144732002	T	C	SNP	Hom	GRMZM2G427031	GRMZM2G427031		GRMZM2G427031_T01	Exon_10_144731476_144732059	19	SYNONYMOUS_CODING	caT/caC	caT/caC	1112	2
10	144734369	C	G	SNP	Hom	GRMZM2G427031	GRMZM2G427031		GRMZM2G427031_T01	Exon_10_144734245_144735125	21	NON_SYNONYMOUS_CODING	aCa/aGa	aCa/aGa	1242	1
10	144734659	A	G	SNP	Hom	GRMZM2G427031	GRMZM2G427031		GRMZM2G427031_T01	Exon_10_144734245_144735125	21	NON_SYNONYMOUS_CODING	Atc/Gtc	Atc/Gtc	1339	1
10	144734681	G	A	SNP	Hom	GRMZM2G427031	GRMZM2G427031		GRMZM2G427031_T01	Exon_10_144734245_144735125	21	NON_SYNONYMOUS_CODING	gGt/gAt	gGt/gAt	1346	1
10	144734940	T	A	SNP	Hom	GRMZM2G427031	GRMZM2G427031		GRMZM2G427031_T01	Exon_10_144734245_144735125	21	SYNONYMOUS_CODING	atT/atA	atT/atA	1432	3
10	144735255	G	T	SNP	Hom	GRMZM2G427031	GRMZM2G427031		GRMZM2G427031_T01	Exon_10_144735231_144735522	22	SYNONYMOUS_CODING	ctG/ctT	ctG/ctT	1502	4
10	144735471	A	T	SNP	Hom	GRMZM2G427031	GRMZM2G427031		GRMZM2G427031_T01	Exon_10_144735231_144735522	22	SYNONYMOUS_CODING	tcA/tcT	tcA/tcT	1574	4
10	144736150	G	A	SNP	Hom	GRMZM2G427031	GRMZM2G427031		GRMZM2G427031_T01	Exon_10_144736130_144737074	23	SYNONYMOUS_CODING	aaG/aaA	aaG/aaA	1598	2
10	144736342	A	G	SNP	Hom	GRMZM2G427031	GRMZM2G427031		GRMZM2G427031_T01	Exon_10_144736130_144737074	23	SYNONYMOUS_CODING	agA/agG	agA/agG	1662	2
10	144738132	T	C	SNP	Hom	GRMZM2G427031	GRMZM2G427031		GRMZM2G427031_T01	Exon_10_144738109_144738380	24	SYNONYMOUS_CODING	gaT/gaC	gaT/gaC	1914	2
10	144738228	C	T	SNP	Hom	GRMZM2G427031	GRMZM2G427031		GRMZM2G427031_T01	Exon_10_144738109_144738380	24	SYNONYMOUS_CODING	atC/atT	atC/atT	1946	3
10	144738894	A	T	SNP	Hom	GRMZM2G427031	GRMZM2G427031		GRMZM2G427031_T01	Exon_10_144738888_144739736	25	SYNONYMOUS_CODING	ggA/ggT	ggA/ggT	1999	4
10	144739023	T	C	SNP	Hom	GRMZM2G427031	GRMZM2G427031		GRMZM2G427031_T01	Exon_10_144738888_144739736	25	SYNONYMOUS_CODING	cgT/cgC	cgT/cgC	2042	4
10	144739029	T	C	SNP	Hom	GRMZM2G427031	GRMZM2G427031		GRMZM2G427031_T01	Exon_10_144738888_144739736	25	SYNONYMOUS_CODING	acT/acC	acT/acC	2044	4
10	144750682	A	G	SNP	Hom	GRMZM2G128549	GRMZM2G128549		GRMZM2G128549_T01	Exon_10_144750588_144752098	1	NON_SYNONYMOUS_CODING	Acg/Gcg	Acg/Gcg	25	1
10	144752052	C	T	SNP	Hom	GRMZM2G128549	GRMZM2G128549		GRMZM2G128549_T01	Exon_10_144750588_144752098	1	SYNONYMOUS_CODING	gaC/gaT	gaC/gaT	481	2
10	144752505	G	A	SNP	Hom	GRMZM2G128549	GRMZM2G128549		GRMZM2G128549_T01	Exon_10_144752183_144753159	2	SYNONYMOUS_CODING	acG/acA	acG/acA	604	4
10	144844612	C	G	SNP	Hom	GRMZM2G114434	GRMZM2G114434		GRMZM2G114434_T01	Exon_10_144844366_144845147	1	NON_SYNONYMOUS_CODING	gCc/gGc	gCc/gGc	19	1
10	144914101	A	G	SNP	Hom	GRMZM2G085236	GRMZM2G085236		GRMZM2G085236_T02	Exon_10_144913723_144914958	7	SYNONYMOUS_CODING	gaT/gaC	gaT/gaC	1030	2
10	144914101	A	G	SNP	Hom	GRMZM2G085236	GRMZM2G085236		GRMZM2G085236_T01	Exon_10_144913379_144914958	9	SYNONYMOUS_CODING	gaT/gaC	gaT/gaC	1150	2
10	144914101	A	G	SNP	Hom	GRMZM2G085236	GRMZM2G085236		GRMZM2G085236_T03	Exon_10_144913723_144914958	3	SYNONYMOUS_CODING	gaT/gaC	gaT/gaC	621	2
10	144914349	T	C	SNP	Hom	GRMZM2G085236	GRMZM2G085236		GRMZM2G085236_T02	Exon_10_144913723_144914958	7	NON_SYNONYMOUS_CODING	Atc/Gtc	Atc/Gtc	948	1
10	144914349	T	C	SNP	Hom	GRMZM2G085236	GRMZM2G085236		GRMZM2G085236_T01	Exon_10_144913379_144914958	9	NON_SYNONYMOUS_CODING	Atc/Gtc	Atc/Gtc	1068	1
10	144914349	T	C	SNP	Hom	GRMZM2G085236	GRMZM2G085236		GRMZM2G085236_T03	Exon_10_144913723_144914958	3	NON_SYNONYMOUS_CODING	Atc/Gtc	Atc/Gtc	539	1
10	144914362	T	A	SNP	Hom	GRMZM2G085236	GRMZM2G085236		GRMZM2G085236_T02	Exon_10_144913723_144914958	7	SYNONYMOUS_CODING	tcA/tcT	tcA/tcT	943	4
10	144914362	T	A	SNP	Hom	GRMZM2G085236	GRMZM2G085236		GRMZM2G085236_T01	Exon_10_144913379_144914958	9	SYNONYMOUS_CODING	tcA/tcT	tcA/tcT	1063	4
10	144914362	T	A	SNP	Hom	GRMZM2G085236	GRMZM2G085236		GRMZM2G085236_T03	Exon_10_144913723_144914958	3	SYNONYMOUS_CODING	tcA/tcT	tcA/tcT	534	4
10	144914458	A	G	SNP	Hom	GRMZM2G085236	GRMZM2G085236		GRMZM2G085236_T02	Exon_10_144913723_144914958	7	SYNONYMOUS_CODING	ttT/ttC	ttT/ttC	911	2
10	144914458	A	G	SNP	Hom	GRMZM2G085236	GRMZM2G085236		GRMZM2G085236_T01	Exon_10_144913379_144914958	9	SYNONYMOUS_CODING	ttT/ttC	ttT/ttC	1031	2
10	144914458	A	G	SNP	Hom	GRMZM2G085236	GRMZM2G085236		GRMZM2G085236_T03	Exon_10_144913723_144914958	3	SYNONYMOUS_CODING	ttT/ttC	ttT/ttC	502	2
10	144915220	G	C	SNP	Hom	GRMZM2G085236	GRMZM2G085236		GRMZM2G085236_T02	Exon_10_144915139_144915380	6	SYNONYMOUS_CODING	gtC/gtG	gtC/gtG	717	4
10	144915220	G	C	SNP	Hom	GRMZM2G085236	GRMZM2G085236		GRMZM2G085236_T01	Exon_10_144915139_144915380	8	SYNONYMOUS_CODING	gtC/gtG	gtC/gtG	837	4
10	144915220	G	C	SNP	Hom	GRMZM2G085236	GRMZM2G085236		GRMZM2G085236_T03	Exon_10_144915139_144915380	2	SYNONYMOUS_CODING	gtC/gtG	gtC/gtG	308	4
10	144915235	A	G	SNP	Hom	GRMZM2G085236	GRMZM2G085236		GRMZM2G085236_T02	Exon_10_144915139_144915380	6	SYNONYMOUS_CODING	ctT/ctC	ctT/ctC	712	4
10	144915235	A	G	SNP	Hom	GRMZM2G085236	GRMZM2G085236		GRMZM2G085236_T01	Exon_10_144915139_144915380	8	SYNONYMOUS_CODING	ctT/ctC	ctT/ctC	832	4
10	144915235	A	G	SNP	Hom	GRMZM2G085236	GRMZM2G085236		GRMZM2G085236_T03	Exon_10_144915139_144915380	2	SYNONYMOUS_CODING	ctT/ctC	ctT/ctC	303	4
10	144915325	G	A	SNP	Hom	GRMZM2G085236	GRMZM2G085236		GRMZM2G085236_T02	Exon_10_144915139_144915380	6	SYNONYMOUS_CODING	ctC/ctT	ctC/ctT	682	4
10	144915325	G	A	SNP	Hom	GRMZM2G085236	GRMZM2G085236		GRMZM2G085236_T01	Exon_10_144915139_144915380	8	SYNONYMOUS_CODING	ctC/ctT	ctC/ctT	802	4
10	144915325	G	A	SNP	Hom	GRMZM2G085236	GRMZM2G085236		GRMZM2G085236_T03	Exon_10_144915139_144915380	2	SYNONYMOUS_CODING	ctC/ctT	ctC/ctT	273	4
10	144916934	G	A	SNP	Hom	GRMZM2G085236	GRMZM2G085236		GRMZM2G085236_T02	Exon_10_144916682_144916998	3	SYNONYMOUS_CODING	Ctg/Ttg	Ctg/Ttg	230	2
10	144916934	G	A	SNP	Hom	GRMZM2G085236	GRMZM2G085236		GRMZM2G085236_T01	Exon_10_144916682_144916998	5	SYNONYMOUS_CODING	Ctg/Ttg	Ctg/Ttg	350	2
10	144919554	G	A	SNP	Hom	GRMZM2G085236	GRMZM2G085236		GRMZM2G085236_T02	Exon_10_144919473_144920040	1	SYNONYMOUS_CODING	ggC/ggT	ggC/ggT	94	4
10	144919554	G	A	SNP	Hom	GRMZM2G085236	GRMZM2G085236		GRMZM2G085236_T01	Exon_10_144919473_144919849	3	SYNONYMOUS_CODING	ggC/ggT	ggC/ggT	214	4
10	144919716	G	C	SNP	Hom	GRMZM2G085236	GRMZM2G085236		GRMZM2G085236_T02	Exon_10_144919473_144920040	1	SYNONYMOUS_CODING	gtC/gtG	gtC/gtG	40	4
10	144919716	G	C	SNP	Hom	GRMZM2G085236	GRMZM2G085236		GRMZM2G085236_T01	Exon_10_144919473_144919849	3	SYNONYMOUS_CODING	gtC/gtG	gtC/gtG	160	4
10	144919818	G	C	SNP	Hom	GRMZM2G085236	GRMZM2G085236		GRMZM2G085236_T02	Exon_10_144919473_144920040	1	SYNONYMOUS_CODING	cgC/cgG	cgC/cgG	6	4
10	144919818	G	C	SNP	Hom	GRMZM2G085236	GRMZM2G085236		GRMZM2G085236_T01	Exon_10_144919473_144919849	3	SYNONYMOUS_CODING	cgC/cgG	cgC/cgG	126	4
10	144920286	T	G	SNP	Hom	GRMZM2G085236	GRMZM2G085236		GRMZM2G085236_T01	Exon_10_144920279_144920333	2	SYNONYMOUS_CODING	tcA/tcC	tcA/tcC	113	4
10	144920728	A	G	SNP	Hom	GRMZM2G085236	GRMZM2G085236		GRMZM2G085236_T01	Exon_10_144920473_144921010	1	SYNONYMOUS_CODING	gaT/gaC	gaT/gaC	12	2
10	144936117	T	C	SNP	Hom	AC189795.3_FG001	AC189795.3_FG001		AC189795.3_FGT001	Exon_10_144935718_144936437	1	NON_SYNONYMOUS_CODING	gTa/gCa	gTa/gCa	131	1
10	144957179	A	G	SNP	Hom	GRMZM2G044100	GRMZM2G044100		GRMZM2G044100_T01	Exon_10_144957116_144957300	3	NON_SYNONYMOUS_CODING	Atc/Gtc	Atc/Gtc	119	1
10	144957351	C	T	SNP	Hom	GRMZM2G044100	GRMZM2G044100		GRMZM2G044100_T02	Exon_10_144957349_144957941	2	STOP_GAINED	Caa/Taa	Caa/Taa	41	1
10	144957360	C	T	SNP	Hom	GRMZM2G044100	GRMZM2G044100		GRMZM2G044100_T02	Exon_10_144957349_144957941	2	SYNONYMOUS_CODING	Ctg/Ttg	Ctg/Ttg	44	2
10	144957391	T	C	SNP	Hom	GRMZM2G044100	GRMZM2G044100		GRMZM2G044100_T02	Exon_10_144957349_144957941	2	NON_SYNONYMOUS_CODING	tTc/tCc	tTc/tCc	54	1
10	144957479	C	T	SNP	Hom	GRMZM2G044100	GRMZM2G044100		GRMZM2G044100_T02	Exon_10_144957349_144957941	2	SYNONYMOUS_CODING	gtC/gtT	gtC/gtT	83	4
10	144957479	C	T	SNP	Hom	GRMZM2G044100	GRMZM2G044100		GRMZM2G044100_T01	Exon_10_144957416_144957700	4	SYNONYMOUS_CODING	gtC/gtT	gtC/gtT	180	4
10	144957545	G	C	SNP	Hom	GRMZM2G044100	GRMZM2G044100		GRMZM2G044100_T02	Exon_10_144957349_144957941	2	SYNONYMOUS_CODING	gcG/gcC	gcG/gcC	105	4
10	144957545	G	C	SNP	Hom	GRMZM2G044100	GRMZM2G044100		GRMZM2G044100_T01	Exon_10_144957416_144957700	4	SYNONYMOUS_CODING	gcG/gcC	gcG/gcC	202	4
10	144957651	A	G	SNP	Hom	GRMZM2G044100	GRMZM2G044100		GRMZM2G044100_T02	Exon_10_144957349_144957941	2	NON_SYNONYMOUS_CODING	Act/Gct	Act/Gct	141	1
10	144957651	A	G	SNP	Hom	GRMZM2G044100	GRMZM2G044100		GRMZM2G044100_T01	Exon_10_144957416_144957700	4	NON_SYNONYMOUS_CODING	Act/Gct	Act/Gct	238	1
10	144978506	A	G	SNP	Hom	GRMZM2G127668	GRMZM2G127668		GRMZM2G127668_T02	Exon_10_144978459_144979060	1	NON_SYNONYMOUS_CODING	Acg/Gcg	Acg/Gcg	2	1
10	144978506	A	G	SNP	Hom	GRMZM2G127668	GRMZM2G127668		GRMZM2G127668_T01	Exon_10_144978459_144978924	1	NON_SYNONYMOUS_CODING	Acg/Gcg	Acg/Gcg	2	1
10	144978512	A	G	SNP	Hom	GRMZM2G127668	GRMZM2G127668		GRMZM2G127668_T02	Exon_10_144978459_144979060	1	NON_SYNONYMOUS_CODING	Agc/Ggc	Agc/Ggc	4	1
10	144978512	A	G	SNP	Hom	GRMZM2G127668	GRMZM2G127668		GRMZM2G127668_T01	Exon_10_144978459_144978924	1	NON_SYNONYMOUS_CODING	Agc/Ggc	Agc/Ggc	4	1
10	144978625	T	C	SNP	Hom	GRMZM2G127668	GRMZM2G127668		GRMZM2G127668_T02	Exon_10_144978459_144979060	1	SYNONYMOUS_CODING	gcT/gcC	gcT/gcC	41	4
10	144978625	T	C	SNP	Hom	GRMZM2G127668	GRMZM2G127668		GRMZM2G127668_T01	Exon_10_144978459_144978924	1	SYNONYMOUS_CODING	gcT/gcC	gcT/gcC	41	4
10	144979355	T	C	SNP	Hom	GRMZM2G127668	GRMZM2G127668		GRMZM2G127668_T01	Exon_10_144979216_144979540	2	SYNONYMOUS_CODING	Ttg/Ctg	Ttg/Ctg	188	2
10	144979844	C	T	SNP	Hom	GRMZM2G127668	GRMZM2G127668		GRMZM2G127668_T01	Exon_10_144979752_144980157	3	SYNONYMOUS_CODING	caC/caT	caC/caT	280	2
10	144983179	G	A	SNP	Hom	GRMZM2G003190	GRMZM2G003190		GRMZM2G003190_T01	Exon_10_144982981_144983196	7	NON_SYNONYMOUS_CODING	aCg/aTg	aCg/aTg	262	1
10	144983562	A	G	SNP	Hom	GRMZM2G003190	GRMZM2G003190		GRMZM2G003190_T01	Exon_10_144983552_144983670	5	NON_SYNONYMOUS_CODING	gTg/gCg	gTg/gCg	231	1
10	144983653	T	C	SNP	Hom	GRMZM2G003190	GRMZM2G003190		GRMZM2G003190_T01	Exon_10_144983552_144983670	5	NON_SYNONYMOUS_CODING	Atc/Gtc	Atc/Gtc	201	1
10	144983837	A	T	SNP	Hom	GRMZM2G003190	GRMZM2G003190		GRMZM2G003190_T01	Exon_10_144983764_144983866	4	SYNONYMOUS_CODING	gcT/gcA	gcT/gcA	170	4
10	144984495	G	A	SNP	Hom	GRMZM2G003190	GRMZM2G003190		GRMZM2G003190_T01	Exon_10_144984450_144984586	3	SYNONYMOUS_CODING	ctC/ctT	ctC/ctT	145	4
10	144985424	T	C	SNP	Hom	GRMZM2G003190	GRMZM2G003190		GRMZM2G003190_T01	Exon_10_144985387_144985535	2	SYNONYMOUS_CODING	gcA/gcG	gcA/gcG	102	4
10	144986135	A	C	SNP	Hom	GRMZM2G003190	GRMZM2G003190		GRMZM2G003190_T01	Exon_10_144986098_144986585	1	NON_SYNONYMOUS_CODING	Ttg/Gtg	Ttg/Gtg	53	2
10	145019186	C	G	SNP	Hom	GRMZM2G331770	GRMZM2G331770		GRMZM2G331770_T01	Exon_10_145019145_145019217	1	SYNONYMOUS_CODING	ctC/ctG	ctC/ctG	14	4
10	145019196	G	C	SNP	Hom	GRMZM2G331770	GRMZM2G331770		GRMZM2G331770_T01	Exon_10_145019145_145019217	1	NON_SYNONYMOUS_CODING	Gtg/Ctg	Gtg/Ctg	18	1
10	145019639	G	A	SNP	Hom	GRMZM2G331770	GRMZM2G331770		GRMZM2G331770_T01	Exon_10_145019551_145019650	3	NON_SYNONYMOUS_CODING	gGg/gAg	gGg/gAg	70	1
10	145175157	C	T	SNP	Hom	GRMZM2G086136	GRMZM2G086136		GRMZM2G086136_T01	Exon_10_145174954_145175300	1	SYNONYMOUS_CODING	Ctg/Ttg	Ctg/Ttg	11	2
10	145175183	A	G	SNP	Hom	GRMZM2G086136	GRMZM2G086136		GRMZM2G086136_T01	Exon_10_145174954_145175300	1	SYNONYMOUS_CODING	gcA/gcG	gcA/gcG	19	4
10	145176044	C	T	SNP	Hom	GRMZM2G086136	GRMZM2G086136		GRMZM2G086136_T01	Exon_10_145176037_145176172	4	SYNONYMOUS_CODING	Ctg/Ttg	Ctg/Ttg	143	2
10	145188221	G	C	SNP	Hom	GRMZM2G086030	GRMZM2G086030		GRMZM2G086030_T01	Exon_10_145188197_145188255	6	NON_SYNONYMOUS_CODING	gGc/gCc	gGc/gCc	206	1
10	145189181	A	G	SNP	Hom	GRMZM2G086030	GRMZM2G086030		GRMZM2G086030_T01	Exon_10_145188842_145189375	9	NON_SYNONYMOUS_CODING	Act/Gct	Act/Gct	409	1
10	145189186	T	G	SNP	Hom	GRMZM2G086030	GRMZM2G086030		GRMZM2G086030_T01	Exon_10_145188842_145189375	9	SYNONYMOUS_CODING	acT/acG	acT/acG	410	4
10	145189191	G	A	SNP	Hom	GRMZM2G086030	GRMZM2G086030		GRMZM2G086030_T01	Exon_10_145188842_145189375	9	NON_SYNONYMOUS_CODING	gGt/gAt	gGt/gAt	412	1
10	145189195	A	G	SNP	Hom	GRMZM2G086030	GRMZM2G086030		GRMZM2G086030_T01	Exon_10_145188842_145189375	9	SYNONYMOUS_CODING	tcA/tcG	tcA/tcG	413	4
10	145189314	T	C	SNP	Hom	GRMZM2G086030	GRMZM2G086030		GRMZM2G086030_T01	Exon_10_145188842_145189375	9	NON_SYNONYMOUS_CODING	aTg/aCg	aTg/aCg	453	1
10	145189577	G	A	SNP	Hom	GRMZM2G086030	GRMZM2G086030		GRMZM2G086030_T01	Exon_10_145189469_145189659	10	NON_SYNONYMOUS_CODING	Gtc/Atc	Gtc/Atc	510	1
10	145190069	T	G	SNP	Hom	GRMZM2G086030	GRMZM2G086030		GRMZM2G086030_T01	Exon_10_145189934_145190378	11	SYNONYMOUS_CODING	ctT/ctG	ctT/ctG	582	4
10	145191864	T	C	SNP	Hom	GRMZM2G086030	GRMZM2G086030		GRMZM2G086030_T01	Exon_10_145191847_145191939	15	SYNONYMOUS_CODING	gtT/gtC	gtT/gtC	821	4
10	145192120	A	T	SNP	Hom	GRMZM2G086030	GRMZM2G086030		GRMZM2G086030_T01	Exon_10_145192033_145192134	16	NON_SYNONYMOUS_CODING	Agc/Tgc	Agc/Tgc	876	1
10	145192350	T	C	SNP	Hom	GRMZM2G086030	GRMZM2G086030		GRMZM2G086030_T01	Exon_10_145192261_145192365	17	SYNONYMOUS_CODING	acT/acC	acT/acC	910	4
10	145194384	G	T	SNP	Hom	GRMZM2G086030	GRMZM2G086030		GRMZM2G086030_T01	Exon_10_145194283_145194414	20	NON_SYNONYMOUS_CODING	gaG/gaT	gaG/gaT	1055	2
10	145194550	G	A	SNP	Hom	GRMZM2G086030	GRMZM2G086030		GRMZM2G086030_T01	Exon_10_145194494_145194606	21	SYNONYMOUS_CODING	gcG/gcA	gcG/gcA	1084	4
10	145194713	A	G	SNP	Hom	GRMZM2G086030	GRMZM2G086030		GRMZM2G086030_T01	Exon_10_145194683_145194764	22	SYNONYMOUS_CODING	ccA/ccG	ccA/ccG	1113	4
10	145195666	T	G	SNP	Hom	GRMZM2G086030	GRMZM2G086030		GRMZM2G086030_T01	Exon_10_145195502_145197508	23	NON_SYNONYMOUS_CODING	caT/caG	caT/caG	1185	2
10	145195812	G	A	SNP	Hom	GRMZM2G086030	GRMZM2G086030		GRMZM2G086030_T01	Exon_10_145195502_145197508	23	NON_SYNONYMOUS_CODING	gGt/gAt	gGt/gAt	1234	1
10	145195814	A	G	SNP	Hom	GRMZM2G086030	GRMZM2G086030		GRMZM2G086030_T01	Exon_10_145195502_145197508	23	NON_SYNONYMOUS_CODING	Agt/Ggt	Agt/Ggt	1235	1
10	145195866	A	G	SNP	Hom	GRMZM2G086030	GRMZM2G086030		GRMZM2G086030_T01	Exon_10_145195502_145197508	23	NON_SYNONYMOUS_CODING	gAc/gGc	gAc/gGc	1252	1
10	145195903	A	T	SNP	Hom	GRMZM2G086030	GRMZM2G086030		GRMZM2G086030_T01	Exon_10_145195502_145197508	23	SYNONYMOUS_CODING	tcA/tcT	tcA/tcT	1264	4
10	145195978	C	T	SNP	Hom	GRMZM2G086030	GRMZM2G086030		GRMZM2G086030_T01	Exon_10_145195502_145197508	23	SYNONYMOUS_CODING	agC/agT	agC/agT	1289	2
10	145196004	T	C	SNP	Hom	GRMZM2G086030	GRMZM2G086030		GRMZM2G086030_T01	Exon_10_145195502_145197508	23	NON_SYNONYMOUS_CODING	cTa/cCa	cTa/cCa	1298	1
10	145196044	C	T	SNP	Hom	GRMZM2G086030	GRMZM2G086030		GRMZM2G086030_T01	Exon_10_145195502_145197508	23	SYNONYMOUS_CODING	ttC/ttT	ttC/ttT	1311	2
10	145196238	T	G	SNP	Hom	GRMZM2G086030	GRMZM2G086030		GRMZM2G086030_T01	Exon_10_145195502_145197508	23	NON_SYNONYMOUS_CODING	aTt/aGt	aTt/aGt	1376	1
10	145196248	T	C	SNP	Hom	GRMZM2G086030	GRMZM2G086030		GRMZM2G086030_T01	Exon_10_145195502_145197508	23	SYNONYMOUS_CODING	gaT/gaC	gaT/gaC	1379	2
10	145196262	C	T	SNP	Hom	GRMZM2G086030	GRMZM2G086030		GRMZM2G086030_T01	Exon_10_145195502_145197508	23	NON_SYNONYMOUS_CODING	gCa/gTa	gCa/gTa	1384	1
10	145196422	C	T	SNP	Hom	GRMZM2G086030	GRMZM2G086030		GRMZM2G086030_T01	Exon_10_145195502_145197508	23	SYNONYMOUS_CODING	atC/atT	atC/atT	1437	3
10	145196952	A	G	SNP	Hom	GRMZM2G086030	GRMZM2G086030		GRMZM2G086030_T01	Exon_10_145195502_145197508	23	NON_SYNONYMOUS_CODING	aAt/aGt	aAt/aGt	1614	1
10	145203612	C	T	SNP	Hom	AC204437.3_FG004	AC204437.3_FG004		AC204437.3_FGT004	Exon_10_145202943_145203656	1	STOP_GAINED	Cga/Tga	Cga/Tga	224	2
10	145203618	G	A	SNP	Hom	AC204437.3_FG004	AC204437.3_FG004		AC204437.3_FGT004	Exon_10_145202943_145203656	1	NON_SYNONYMOUS_CODING	Ggc/Agc	Ggc/Agc	226	1
10	145203636	A	G	SNP	Hom	AC204437.3_FG004	AC204437.3_FG004		AC204437.3_FGT004	Exon_10_145202943_145203656	1	NON_SYNONYMOUS_CODING	Agt/Ggt	Agt/Ggt	232	1
10	145203647	A	G	SNP	Hom	AC204437.3_FG004	AC204437.3_FG004		AC204437.3_FGT004	Exon_10_145202943_145203656	1	SYNONYMOUS_CODING	ctA/ctG	ctA/ctG	235	4
10	145204446	A	C	SNP	Hom	GRMZM2G064831	GRMZM2G064831		GRMZM2G064831_T01	Exon_10_145204435_145204570	7	NON_SYNONYMOUS_CODING	Tgt/Ggt	Tgt/Ggt	243	1
10	145204528	T	A	SNP	Hom	GRMZM2G064831	GRMZM2G064831		GRMZM2G064831_T01	Exon_10_145204435_145204570	7	SYNONYMOUS_CODING	ctA/ctT	ctA/ctT	215	4
10	145204531	C	G	SNP	Hom	GRMZM2G064831	GRMZM2G064831		GRMZM2G064831_T01	Exon_10_145204435_145204570	7	SYNONYMOUS_CODING	acG/acC	acG/acC	214	4
10	145204567	G	A	SNP	Hom	GRMZM2G064831	GRMZM2G064831		GRMZM2G064831_T01	Exon_10_145204435_145204570	7	SYNONYMOUS_CODING	gcC/gcT	gcC/gcT	202	4
10	145204684	A	T	SNP	Hom	GRMZM2G064831	GRMZM2G064831		GRMZM2G064831_T01	Exon_10_145204677_145204794	6	NON_SYNONYMOUS_CODING	Tac/Aac	Tac/Aac	199	1
10	145204685	A	G	SNP	Hom	GRMZM2G064831	GRMZM2G064831		GRMZM2G064831_T01	Exon_10_145204677_145204794	6	SYNONYMOUS_CODING	gaT/gaC	gaT/gaC	198	2
10	145204748	A	G	SNP	Hom	GRMZM2G064831	GRMZM2G064831		GRMZM2G064831_T01	Exon_10_145204677_145204794	6	SYNONYMOUS_CODING	ccT/ccC	ccT/ccC	177	4
10	145205030	T	C	SNP	Hom	GRMZM2G064831	GRMZM2G064831		GRMZM2G064831_T01	Exon_10_145204942_145205043	5	SYNONYMOUS_CODING	aaA/aaG	aaA/aaG	132	2
10	145205030	T	C	SNP	Hom	GRMZM2G064831	GRMZM2G064831		GRMZM2G064831_T02	Exon_10_145204831_145205043	5	SYNONYMOUS_CODING	aaA/aaG	aaA/aaG	132	2
10	146294550	C	T	SNP	Hom	GRMZM2G058588	GRMZM2G058588		GRMZM2G058588_T01	Exon_10_146294251_146295099	1	SYNONYMOUS_CODING	ccG/ccA	ccG/ccA	124	4
