# Supplementary material for: Sequence and Ionomic Analysis of Divergent Strains of Maize Inbred Line B73 with an Altered Growth Phenotype
Source: PLoS One. 2014 May 7;9(5):e96782. doi: 10.1371/journal.pone.0096782 (PMC4013074; doi:10.1371/journal.pone.0096782)
Supplement: Table S2 — List of 121 differentially expressed genes with functional annotation. (XLSX) [file pone.0096782.s005.xlsx]

## Sheet: DE genes
gene	located in introgression	locus	sample_1	sample_2	value_1	value_2	log2.fold_change.	test_stat	p_value	q_value	source	accession	annotation_AGPv3
GRMZM2G002010		8:78831712-78832735	setA	setB	1.98879	0	-Inf	NA	5e-05	0.00146508	NA	NA	Uncharacterized protein
GRMZM2G087893		5:37174058-37175833	setA	setB	0	5.26142	Inf	NA	5e-05	0.00146508	NA	NA	NA
GRMZM2G377663		6:152803657-152805574	setA	setB	0	1.36888	Inf	NA	5e-05	0.00146508	NA	NA	Uncharacterized protein
GRMZM5G803802		1:66755074-66755914	setA	setB	1.53374	0	-Inf	NA	5e-05	0.00146508	RefSeq peptide	NP_001146188	Uncharacterized protein
GRMZM5G832452		3:40874493-40875361	setA	setB	4.12184	0	-Inf	NA	5e-05	0.00146508	UniProtKB/TrEMBL	C4J7H7	Uncharacterized protein
GRMZM5G854604	X	10:143901463-143902327	setA	setB	5.21967	0	-Inf	NA	5e-05	0.00146508	UniProtKB/TrEMBL	B6SHA9	Uncharacterized protein
GRMZM5G876960		6:88147580-88148356	setA	setB	0	20.3769	Inf	NA	5e-05	0.00146508	NA	NA	Uncharacterized protein
GRMZM5G896983	X	10:144195253-144195832	setA	setB	7.74964	0	-Inf	NA	5e-05	0.00146508	RefSeq peptide	NP_001146597	Uncharacterized protein
GRMZM2G049021		5:133618125-133626411	setA	setB	0.124719	54.0934	8.76063	9.48605	5e-05	0.00146508	RefSeq peptide	NP_001148649	Isochorismatase family protein rutB
GRMZM2G048403		1:210102760-210126447	setA	setB	0.0232181	2.22423	6.58191	7.95694	5e-05	0.00146508	NA	NA	NA
GRMZM2G479746		6:32536876-32553298	setA	setB	15.8999	0.209843	-6.24356	-9.45526	5e-05	0.00146508	UniProtKB/TrEMBL	B4FKD8	Uncharacterized protein
GRMZM2G078465		7:140007358-140009147	setA	setB	51.3354	1.31505	-5.28677	-13.5046	5e-05	0.00146508	RefSeq peptide	NP_001150551	Uncharacterized protein
GRMZM2G048475		1:210098312-210101744	setA	setB	0.0359491	1.38605	5.26888	5.18682	0.0006	0.0117408	NA	NA	NA
GRMZM2G177104		7:725415-726516	setA	setB	0.270292	8.95983	5.05088	9.3211	5e-05	0.00146508	NA	NA	NA
GRMZM2G135011		1:285927069-285928089	setA	setB	0.0542278	1.69059	4.96235	5.40947	0.0001	0.00264088	RefSeq peptide	NP_001146387	Uncharacterized protein
GRMZM2G013630		5:136305945-136307736	setA	setB	0.0599213	1.84234	4.94232	3.88805	5e-05	0.00146508	RefSeq peptide	NP_001149379	Polyphosphoinositide binding protein Ssh2p
GRMZM2G089288		7:8901781-8904176	setA	setB	0.076331	2.07515	4.7648	4.33867	5e-05	0.00146508	RefSeq peptide	NP_001151768	Uncharacterized protein
GRMZM2G026930		3:216304733-216306568	setA	setB	2.20553	0.0986795	-4.48223	-5.0595	5e-05	0.00146508	UniProtKB/Swiss-Prot	P51108	Dihydroflavonol-4-reductase
GRMZM2G127251		6:106835032-106836712	setA	setB	2.56243	0.125355	-4.35342	-7.96093	5e-05	0.00146508	RefSeq peptide	NP_001142105	Uncharacterized protein
GRMZM2G087101		3:209593098-209594907	setA	setB	0.310796	6.29822	4.34091	9.44905	5e-05	0.00146508	NA	NA	NA
GRMZM2G031827		8:70136196-70144793	setA	setB	0.770651	15.2054	4.30236	8.30521	5e-05	0.00146508	RefSeq peptide	NP_001148499	Splicing factor U2af subunit isoform 1, Splicing factor U2af subunit isoform 2, Splicing factor U2af subunit isoform 3, Splicing factor U2af subunit isoform 4, Splicing factor U2af subunit isoform 5
GRMZM2G148495	X	10:143441813-143443046	setA	setB	2.78058	0.148297	-4.22883	-6.78565	5e-05	0.00146508	RefSeq peptide	NP_001145547	Uncharacterized protein
GRMZM5G827186		7:158690996-158695418	setA	setB	0.123401	2.1924	4.15108	5.70539	5e-05	0.00146508	RefSeq peptide	NP_001140974	Tic20-like protein, Uncharacterized protein
GRMZM2G166218		4:188327735-188329012	setA	setB	0.0613827	1.08563	4.14456	3.76058	0.00025	0.00571881	RefSeq peptide	NP_001145316	Uncharacterized protein
GRMZM2G064091		3:227085018-227087548	setA	setB	115.562	7.49596	-3.94641	-14.5109	5e-05	0.00146508	NA	NA	NA
GRMZM2G052796		3:69204453-69205156	setA	setB	1.44499	21.0442	3.86428	9.44461	5e-05	0.00146508	NA	NA	NA
GRMZM2G360023		3:22737685-22738486	setA	setB	0.221541	3.2019	3.85328	7.128	5e-05	0.00146508	RefSeq peptide	NP_001143053	Putative uncharacterized protein
GRMZM2G110511		8:167407655-167409403	setA	setB	1.0596	0.0781542	-3.76105	-5.75826	5e-05	0.00146508	UniProtKB/Swiss-Prot	Q8RXA5	Cis-zeatin O-glucosyltransferase 2
GRMZM2G345700		2:10539345-10540455	setA	setB	5.06533	65.3317	3.68906	12.2597	5e-05	0.00146508	RefSeq peptide	NP_001140565	36.4 kDa proline-rich protein, Uncharacterized protein
GRMZM2G126239		3:214857326-214861719	setA	setB	0.472337	5.52393	3.54781	5.13342	5e-05	0.00146508	RefSeq peptide	NP_001150230	Homeobox-leucine zipper protein ATHB-4
GRMZM2G035421		8:173349890-173353964	setA	setB	0.647053	7.17722	3.47147	9.23692	5e-05	0.00146508	NA	NA	Putative phospholipase, patatin family protein
GRMZM2G000812		5:126816125-126819003	setA	setB	5.3884	0.489786	-3.45963	-7.1522	5e-05	0.00146508	RefSeq peptide	NP_001168479	Uncharacterized protein
GRMZM2G016890		10:34232716-34238135	setA	setB	0.407816	4.25429	3.38293	5.10249	5e-05	0.00146508	UniProtKB/Swiss-Prot	P49235	Beta-glucosidase, chloroplastic
GRMZM2G000620	X	10:144143810-144147098	setA	setB	11.1788	1.07497	-3.3784	-9.7378	5e-05	0.00146508	RefSeq peptide	NP_001147960	Serine/threonine-protein kinase
GRMZM2G077718		2:185611281-185612173	setA	setB	0.503121	5.17396	3.36229	5.16181	5e-05	0.00146508	NA	NA	NA
GRMZM2G165390		9:11774732-11776491	setA	setB	1.61826	0.159775	-3.34034	-5.42261	5e-05	0.00146508	UniProtKB/Swiss-Prot	P16167	Anthocyanidin 3-O-glucosyltransferase
GRMZM2G161905		9:155596297-155597233	setA	setB	11.1538	1.1343	-3.29766	-9.15216	5e-05	0.00146508	UniProtKB/TrEMBL	Q9FQB4	Glutathione S-transferase GST 25
GRMZM2G090245		6:161451717-161452634	setA	setB	0.159279	1.56241	3.29415	3.95636	5e-05	0.00146508	RefSeq peptide	NP_001130872	Uncharacterized protein
GRMZM2G015542		9:130293816-130297505	setA	setB	2.4505	0.250575	-3.28976	-7.31903	5e-05	0.00146508	RefSeq peptide	NP_001146497	Putative cytochrome P450 superfamily protein, Uncharacterized protein
GRMZM2G005066		9:9740802-9741876	setA	setB	6.1342	0.639411	-3.26206	-7.91995	5e-05	0.00146508	UniProtKB/Swiss-Prot	P10290	Anthocyanin regulatory C1 protein
GRMZM2G036554		10:87419520-87421049	setA	setB	4.536	0.489079	-3.21328	-6.3429	5e-05	0.00146508	NA	NA	Putative HLH DNA-binding domain superfamily protein
GRMZM2G073916		8:91681549-91689395	setA	setB	0.122988	1.12548	3.19395	4.72044	5e-05	0.00146508	RefSeq peptide	NP_001148399	Protein aq_1857
GRMZM2G142241		9:132317534-132318333	setA	setB	0.134326	1.14455	3.09096	5.21694	0.00085	0.015327	NA	NA	Uncharacterized protein
GRMZM2G047368		7:41539129-41540625	setA	setB	147.576	17.4146	-3.08309	-10.1954	5e-05	0.00146508	UniProtKB/Swiss-Prot	Q9ATM5	Aquaporin PIP2-6
GRMZM2G146004		8:5186350-5187295	setA	setB	0.856356	7.12975	3.05757	7.2628	5e-05	0.00146508	NA	NA	Uncharacterized protein
GRMZM2G017319		1:255323651-255325701	setA	setB	0.42075	3.4569	3.03844	5.97998	5e-05	0.00146508	NA	NA	NA
GRMZM2G044902		1:77144728-77146171	setA	setB	1.32108	10.6754	3.01451	6.78175	5e-05	0.00146508	RefSeq peptide	NP_001131814	Uncharacterized protein
GRMZM5G827496		6:146693245-146696531	setA	setB	20.592	2.63086	-2.96848	-10.3962	5e-05	0.00146508	RefSeq peptide	NP_001142266	Uncharacterized protein
GRMZM2G447151		1:258800054-258800675	setA	setB	25.5559	3.28929	-2.95781	-10.823	5e-05	0.00146508	RefSeq peptide	NP_001147398	Putative auxin-induced protein family, SAUR14-auxin-responsive SAUR family member
GRMZM2G126858	X	10:142431764-142442301	setA	setB	2.08877	14.9778	2.8421	8.6048	5e-05	0.00146508	NA	NA	Putative leucine-rich repeat receptor-like protein kinase family protein
GRMZM2G055802		1:293997055-293998873	setA	setB	0.592256	4.20926	2.82927	6.29787	5e-05	0.00146508	NA	NA	NA
AC205886.3_FG001		6:90807105-90815834	setA	setB	2.42978	17.243	2.82711	7.36741	5e-05	0.00146508	NA	NA	Putative ribosomal protein S4 (RPS4A) family protein
GRMZM2G179294		5:180731982-180733210	setA	setB	0.452137	3.11721	2.78542	6.07421	5e-05	0.00146508	RefSeq peptide	NP_001105929	High affinity nitrate transporter
GRMZM2G154735		2:222209220-222210456	setA	setB	7.57242	1.10091	-2.78205	-7.38479	5e-05	0.00146508	RefSeq peptide	NP_001147407	HVA22-like protein e
GRMZM2G128832		7:33171857-33172502	setA	setB	1.38946	9.42414	2.76183	7.66264	5e-05	0.00146508	UniProtKB/TrEMBL	B6TRJ1	Putative uncharacterized protein
GRMZM2G349791		4:1294605-1296012	setA	setB	3.57257	0.529901	-2.75317	-6.3667	5e-05	0.00146508	RefSeq peptide	NP_001150654	O-methyltransferase ZRP4
GRMZM2G346312		3:169317027-169317342	setA	setB	1.23162	8.25639	2.74495	8.90126	5e-05	0.00146508	RefSeq peptide	NP_001168149	Uncharacterized protein
GRMZM2G155525	X	1:293033527-293035348	setA	setB	6.69909	1.00439	-2.73765	-7.3405	5e-05	0.00146508	RefSeq peptide	NP_001148896	Metal ion binding protein
GRMZM2G413315		1:11114483-11114932	setA	setB	0.969729	6.42286	2.72756	6.26794	5e-05	0.00146508	NA	NA	NA
GRMZM2G458659		4:147253235-147255634	setA	setB	103.748	16.571	-2.64635	-7.87096	5e-05	0.00146508	RefSeq peptide	NP_001130686	Uncharacterized protein
GRMZM5G858609		2:57107355-57109918	setA	setB	3.30751	0.538697	-2.6182	-4.95913	5e-05	0.00146508	NA	NA	NA
GRMZM2G035444		1:172897702-172899238	setA	setB	0.20643	1.2573	2.60661	4.54834	5e-05	0.00146508	UniProtKB/Swiss-Prot	B6TUH4	CASP-like protein 2
GRMZM2G105140		3:217462231-217464092	setA	setB	0.229023	1.37977	2.59086	4.91354	5e-05	0.00146508	NA	NA	NA
GRMZM2G151227		2:223888705-223892691	setA	setB	15.3528	2.58074	-2.57265	-8.84993	5e-05	0.00146508	UniProtKB/Swiss-Prot	P24824	Chalcone synthase WHP1
GRMZM2G063244		8:1141429-1145642	setA	setB	1.56654	0.272531	-2.52309	-4.42959	5e-05	0.00146508	RefSeq peptide	NP_001150495	Peptidyl-prolyl cis-trans isomerase
GRMZM2G340257		1:295260463-295261556	setA	setB	14.7412	2.5711	-2.5194	-8.4614	5e-05	0.00146508	NA	NA	NA
GRMZM2G170017		5:188857164-188858944	setA	setB	2.55556	0.449751	-2.50644	-5.39994	5e-05	0.00146508	RefSeq peptide	NP_001147467	Carbonyl reductase 1, Uncharacterized protein
GRMZM2G115698		9:58623136-58628518	setA	setB	1.33135	7.37778	2.4703	5.5736	5e-05	0.00146508	RefSeq peptide	NP_001136649	Uncharacterized protein
GRMZM2G122187		4:11330400-11331868	setA	setB	0.411025	2.26197	2.46028	5.34899	5e-05	0.00146508	NA	NA	Uncharacterized protein
GRMZM2G108949		1:229359021-229359995	setA	setB	2.11077	0.387133	-2.44687	-5.16168	5e-05	0.00146508	NA	NA	NA
GRMZM2G067600		3:214820492-214821231	setA	setB	4.95648	0.9093	-2.44649	-4.63033	5e-05	0.00146508	UniProtKB/TrEMBL	B6SJA5	Putative uncharacterized protein
GRMZM2G433731		2:225857202-225861698	setA	setB	1.36113	0.253539	-2.42452	-5.11649	5e-05	0.00146508	NA	NA	NA
GRMZM2G046952		10:132098076-132099489	setA	setB	0.286907	1.53932	2.42364	3.66532	5e-05	0.00146508	RefSeq peptide	NP_001147663	FIP1
GRMZM2G025459		8:120217908-120221032	setA	setB	0.522921	2.79263	2.41696	3.88841	5e-05	0.00146508	RefSeq peptide	NP_001152166	SNF1 protein kinase regulatory subunit beta-1, Uncharacterized protein
GRMZM2G143035	X	10:144461994-144463334	setA	setB	2.95362	0.553604	-2.41556	-5.30044	5e-05	0.00146508	NA	NA	Uncharacterized protein
GRMZM2G068707		2:88090082-88091258	setA	setB	0.955271	5.09596	2.41537	6.22499	5e-05	0.00146508	RefSeq peptide	NP_001141334	Uncharacterized protein
GRMZM2G110726		9:3927309-3937141	setA	setB	2.36869	12.4274	2.39137	5.52738	5e-05	0.00146508	RefSeq peptide	NP_001148787	Putative HSP20-like chaperone domain family protein, Uncharacterized protein
GRMZM2G122577		6:123914237-123915179	setA	setB	10.7003	2.05106	-2.38321	-8.12549	5e-05	0.00146508	RefSeq DNA	NM_001153037	Uncharacterized protein
GRMZM2G355752		2:233550346-233551880	setA	setB	181.605	34.827	-2.38253	-9.04222	5e-05	0.00146508	RefSeq peptide	NP_001152179	Early light-induced protein
GRMZM2G139744		1:245159702-245165127	setA	setB	10.2667	1.97316	-2.37939	-5.56857	5e-05	0.00146508	RefSeq peptide	NP_001150506	Sec20 family protein
GRMZM2G046615		5:71263183-71266012	setA	setB	31.4313	6.07581	-2.37105	-7.6357	5e-05	0.00146508	RefSeq peptide	NP_001105854	Terpene synthase 2
GRMZM2G360681		6:160621047-160624717	setA	setB	1.0952	0.213224	-2.36075	-4.65311	5e-05	0.00146508	RefSeq peptide	NP_001104935	Heat-shock protein 101, Uncharacterized protein
GRMZM2G076343		2:113312678-113314160	setA	setB	1.85647	0.362414	-2.35685	-5.32228	5e-05	0.00146508	RefSeq peptide	NP_001151080	Uncharacterized protein
GRMZM5G878558		5:210731863-210735309	setA	setB	1.72515	8.77494	2.34667	7.38512	5e-05	0.00146508	RefSeq peptide	NP_001169343	Uncharacterized protein
GRMZM5G884151		9:142015408-142016063	setA	setB	6.04803	30.2681	2.32326	9.07253	5e-05	0.00146508	NA	NA	Uncharacterized protein
GRMZM2G085086		2:83492107-83493198	setA	setB	5.28502	1.0652	-2.31078	-5.86241	5e-05	0.00146508	RefSeq peptide	NP_001151691	Uncharacterized protein
GRMZM2G454424		6:40610616-40613120	setA	setB	3.86227	0.781335	-2.30544	-5.90166	5e-05	0.00146508	NA	NA	Uncharacterized protein
GRMZM2G134888		6:110576546-110582798	setA	setB	0.782313	3.86076	2.30307	5.82896	5e-05	0.00146508	RefSeq peptide	NP_001150669	Amino acid permease, Uncharacterized protein
GRMZM2G011006		5:196800957-196801916	setA	setB	10.0416	49.5036	2.30154	9.5634	5e-05	0.00146508	RefSeq peptide	NP_001132067	Uncharacterized protein
GRMZM2G061900	X	1:293135179-293138761	setA	setB	16.2338	3.31002	-2.29409	-6.19609	5e-05	0.00146508	RefSeq peptide	NP_001140371	Ras-related protein ARA-3, Uncharacterized protein
GRMZM2G165914		3:229034521-229037318	setA	setB	0.217479	1.05582	2.27941	4.45899	5e-05	0.00146508	NA	NA	NA
GRMZM2G457346		1:268936877-268937518	setA	setB	3.89201	0.815105	-2.25546	-5.34244	5e-05	0.00146508	RefSeq peptide	NP_001148039	Seed maturation protein PM41
GRMZM2G022679		3:196062523-196064578	setA	setB	2.53253	0.531352	-2.25284	-5.2133	5e-05	0.00146508	NA	NA	NA
GRMZM2G040115		2:2034097-2037481	setA	setB	6.66138	1.39862	-2.25181	-6.16107	5e-05	0.00146508	RefSeq peptide	NP_001146258	Uncharacterized protein
GRMZM5G803276		7:42333607-42333804	setA	setB	974.236	206.471	-2.23833	-43.1044	5e-05	0.00146508	NA	NA	NA
GRMZM2G043336		3:132154768-132156292	setA	setB	0.659934	3.09614	2.23008	4.74999	5e-05	0.00146508	NA	NA	NA
GRMZM2G123842		8:52841994-52842865	setA	setB	0.423777	1.98192	2.22552	4.43389	0.0001	0.00264088	RefSeq peptide	NP_001169759	Uncharacterized protein
GRMZM2G170400		6:162306496-162311290	setA	setB	2.16897	10.1326	2.22392	5.60711	5e-05	0.00146508	RefSeq peptide	NP_001169597	S-adenosyl-L-methionine: phosphoethanolamine N-methyltransferase, Uncharacterized protein
GRMZM2G090379		1:174932177-174933091	setA	setB	0.61764	2.84568	2.20393	5.62154	5e-05	0.00146508	NA	NA	NA
GRMZM5G855743		7:22317883-22319193	setA	setB	0.277562	1.27486	2.19945	3.89048	5e-05	0.00146508	NA	NA	NA
GRMZM2G168898		6:159147008-159148433	setA	setB	5.45037	24.1469	2.14741	7.35589	5e-05	0.00146508	RefSeq peptide	NP_001105819	Hemoglobin 2, Hemoglobin 2Non-symbiotic hemoglobin 2, Non-symbiotic hemoglobin 2
AC226736.2_FG002		9:112697476-112698391	setA	setB	0.407084	1.77705	2.12609	3.81363	5e-05	0.00146508	NA	NA	Uncharacterized protein
GRMZM2G049378		8:148645308-148647993	setA	setB	8.64824	1.98152	-2.1258	-5.9963	5e-05	0.00146508	RefSeq peptide	NP_001148292	Putative homeodomain-like transcription factor superfamily protein, SANT/MYB protein, Uncharacterized protein
GRMZM2G047292		2:139185151-139187472	setA	setB	0.548675	2.38245	2.11842	3.93358	5e-05	0.00146508	NA	NA	Stachyose synthase
GRMZM2G172710		3:152775333-152781491	setA	setB	3.51976	0.814365	-2.11173	-4.53881	5e-05	0.00146508	UniProtKB/TrEMBL	B6U4X6	Putative uncharacterized protein
GRMZM2G466563		1:220848985-220851551	setA	setB	2.04488	0.474543	-2.10741	-4.29162	5e-05	0.00146508	NA	NA	NA
GRMZM2G061439		3:214372583-214373319	setA	setB	2.22298	9.52014	2.09849	6.36356	5e-05	0.00146508	NA	NA	NA
GRMZM2G360219		8:152588872-152592285	setA	setB	1.3812	0.324575	-2.0893	-4.70785	5e-05	0.00146508	NA	NA	Putative leucine-rich repeat receptor-like protein kinase family protein
GRMZM2G557158		7:68596996-68597472	setA	setB	0.354423	1.49853	2.08	4.09291	0.00165	0.0254703	NA	NA	NA
GRMZM2G100412		5:15313257-15315513	setA	setB	3.14877	0.745704	-2.07811	-4.7811	5e-05	0.00146508	NA	NA	NA
GRMZM2G549568		4:240810555-240812268	setA	setB	17.6907	4.1935	-2.07677	-4.71522	5e-05	0.00146508	RefSeq peptide	NP_001168292	Uncharacterized protein
GRMZM2G149647		1:33459255-33460463	setA	setB	1.97667	0.472874	-2.06355	-4.25472	5e-05	0.00146508	RefSeq peptide	NP_001105583	Heat shock protein 26, Small heat shock protein
GRMZM2G106344		8:171709671-171712582	setA	setB	8.06113	1.92856	-2.06346	-5.41836	5e-05	0.00146508	RefSeq peptide	NP_001131397	Protein disulfide isomerase, Uncharacterized protein
GRMZM2G113203		9:57011528-57017762	setA	setB	20.3356	4.87184	-2.06147	-6.34222	5e-05	0.00146508	RefSeq peptide	NP_001105942	Uncharacterized protein
GRMZM5G881135		Mt:262383-262761	setA	setB	0.567276	2.35605	2.05425	5.03772	0.00145	0.0231369	UniProtKB/Swiss-Prot	P60099	Ribosomal protein S12, mitochondrial
GRMZM2G551472		4:143623593-143624701	setA	setB	0.303939	1.25777	2.04901	2.20007	0.0012	0.0200335	NA	NA	NA
GRMZM2G117956		9:117306635-117309311	setA	setB	3.99271	0.965202	-2.04846	-5.5697	5e-05	0.00146508	RefSeq peptide	NP_001147660	Proline oxidase
GRMZM2G170692		5:186795549-186798126	setA	setB	8.04197	1.95689	-2.03899	-6.59073	5e-05	0.00146508	RefSeq peptide	NP_001168086	Phenylalanine ammonia-lyase
GRMZM2G012140		9:126718178-126723107	setA	setB	1.69932	0.41629	-2.0293	-4.76625	5e-05	0.00146508	NA	NA	Uncharacterized protein
GRMZM2G068519		7:38539989-38542053	setA	setB	0.630936	2.53939	2.00892	3.37818	5e-05	0.00146508	UniProtKB/TrEMBL	B6SH11	Putative uncharacterized protein
GRMZM2G085236	X	10:144913378-144921010	setA	setB	6.8386	1.70216	-2.00633	-4.91226	5e-05	0.00146508	NA	NA	Uncharacterized protein
